# Supplementary material for: Knowledge and practice of hand hygiene among hospitalised patients in a tertiary general hospital in China and their attitudes: a cross-sectional survey
Source: PubMed Central journal article supplement — BMJ Open. 2019 Jun 11;9(6):e027736. doi: 10.1136/bmjopen-2018-027736 (PMC6575675; doi:10.1136/bmjopen-2018-027736), 2019-06-11
Supplement: bmjopen-2018-027736.draft_revisions.pdf [file bmjopen-2018-027736.draft_revisions.pdf]

# BMJ Open

BMJ Open is committed to open peer review. As part of this commitment we make the peer review history of every article we publish publicly available.

When an article is published we post the peer reviewers' comments and the authors' responses online. We also post the versions of the paper that were used during peer review. These are the versions that the peer review comments apply to.

The versions of the paper that follow are the versions that were submitted during the peer review process. They are not the versions of record or the final published versions. They should not be cited or distributed as the published version of this manuscript.

BMJ Open is an open access journal and the full, final, typeset and author-corrected version of record of the manuscript is available on our site with no access controls, subscription charges or pay-per-view fees (<http://bmjopen.bmj.com>).

If you have any questions on BMJ Open's open peer review process please email [info.bmjopen@bmj.com](mailto:info.bmjopen@bmj.com)

# BMJ Open

## Knowledge and Practice of Hand Hygiene Among Hospitalized Patients in a Tertiary General Hospital in China and Their Attitudes: A Cross-Sectional Survey

|                               |                                                                                                                                                                                                                                                                                                                                        |
|-------------------------------|----------------------------------------------------------------------------------------------------------------------------------------------------------------------------------------------------------------------------------------------------------------------------------------------------------------------------------------|
| Journal:                      | <i>BMJ Open</i>                                                                                                                                                                                                                                                                                                                        |
| Manuscript ID                 | bmjopen-2018-027736                                                                                                                                                                                                                                                                                                                    |
| Article Type:                 | Research                                                                                                                                                                                                                                                                                                                               |
| Date Submitted by the Author: | 07-Nov-2018                                                                                                                                                                                                                                                                                                                            |
| Complete List of Authors:     | LI, Yunxia; Xiangya Hospital Central South University, LIU, Yaohong; Xiangya Hospital Central South University, ZENG, Li; Xiangya Hospital Central South University, CHEN, Chong; Xiangya Hospital Central South University, MO, Dan; Xiangya Hospital Central South University, YUAN, Sue; Xiangya Hospital Central South University, |
| Keywords:                     | Infection control < INFECTIOUS DISEASES, Public health < INFECTIOUS DISEASES, Epidemiology < INFECTIOUS DISEASES                                                                                                                                                                                                                       |
|                               |                                                                                                                                                                                                                                                                                                                                        |

SCHOLARONE™  
Manuscripts

1  
2  
3  
4  
5 **Knowledge and Practice of Hand Hygiene Among Hospitalized Patients in a**  
6 **Tertiary General Hospital in China and Their Attitudes: A Cross-Sectional**  
7 **Survey**  
8  
9  
10  
11  
12

13 LI Yunxia<sup>1,2</sup>, LIU Yaohong<sup>3</sup>, ZENG Li<sup>4</sup>, CHEN Chong<sup>5</sup>, MO Dan<sup>1</sup>, YUAN Sue<sup>1,2\*</sup>  
14  
15

16 <sup>1</sup> Infectious Diseases Department, Xiangya Hospital of Central South University, Changsha,  
17  
18 China  
19  
20

21 <sup>2</sup> Xiangya Nursing School, Central South University, Changsha, China  
22

23 <sup>3</sup> Colorectal and Anal Surgical Department, Xiangya Hospital of Central South  
24  
25 University, Changsha, China  
26  
27

28 <sup>4</sup> Burns Department, Xiangya Hospital of Central South University, Changsha, China  
29  
30

31 <sup>5</sup> Cardiology Department, Xiangya Hospital of Central South University, Changsha,  
32  
33 China  
34  
35

36 **\*Correspondence to** YUAN Sue, PhD, RN, Infectious Diseases Department, Xiangya Hospital  
37  
38 of Central South University, 87 Xiangya Rd, Changsha, Hunan 410008, P.R. China.  
39  
40

41 **Tel:** +86 13873158943; **E-mail address:** 248143918@qq.com  
42  
43  
44  
45  
46  
47  
48  
49  
50  
51  
52  
53  
54  
55  
56  
57  
58  
59  
60

## Abstract

**Objectives:** We aimed to gain a better understanding of patients' practice of hand hygiene and their knowledge and attitudes.

**Design:** A Cross-Sectional Survey.

**Setting:** A 3500-bed university-affiliated medical hospital in China.

**Participants:** Inpatients and their family members or caregivers.

**Methods:** An anonymous, self-reported questionnaire were used to collect data.

**Results:** Of the 310 respondents, 47.4% had received hand hygiene education, and 13.5% had a completing understanding of hand hygiene. A majority of patients believed that handwashing was important for disease recovery, and that it could prevent infection development. A total of 62.3% of patients washed their hands less than 5 times a day and 49.0% spent less than 1 minute every time. With regards to the seven steps of handwashing, 96.45% of the respondents adhered to the first step (washing the palms), but only 20.6% adhered to the fifth step (thumbs) and 17.7% to the sixth step (fingertips). Most respondents washed their hands only when visibly dirty. Few patients washed their hands before drinking fluids, and before and after interacting with visitors. hand hygiene compliance was lower among ICU patients than medical patients.

**Conclusions:** Hand hygiene is considered important by most patients. However, the levels of knowledge and compliance are unsatisfactory. Multifaceted and dedicated efforts are needed to improve patient hand hygiene compliance.

**Keywords:** Patient hand hygiene, Inpatient, Health care-associated infection, China

### Strengths and limitations of this study

- We measured the hand hygiene knowledge, attitude, and performance from the prospects of patient view.
- We designed the questionnaire combines both WHO and CDC patient hand hygiene related policies.
- A stratified random sampling method was used in order to make the sample representative.
- This is a single-center cross-sectional survey, our results may not be applicable to all other institutions.
- There is a need for further observational studies including quantitative hand bacterial cultures to verify the results of this study.

## INTRODUCTION

Health care-associated infections (HCAIs) are major risk factors for the development of sepsis,<sup>1</sup> which affects more than 30 million patients every year, worldwide, leading to 6 million potential deaths.<sup>2</sup> Both the Centers for Disease Control and Prevention (CDC) and World Health Organization (WHO) consider hand hygiene (HH) to be the most important factor in the prevention of HCAIs and the spread of pathogens.<sup>3,4</sup> The practice of effective HH plays a key role in the prevention of healthcare-associated sepsis.<sup>5</sup> Great efforts have been made to improve the performance of “My 5 moments for hand hygiene” among healthcare workers (HCWs), and this has had a global improvement. However, the role of patient hand hygiene (PHH) has been underestimated. Emerging evidence suggests that most infections occur as a result of bacteria present within a patient’s own flora as well as bacteria present on surfaces within the healthcare environment;<sup>6-8</sup> therefore, the adequate practice of PHH could decrease pathogen transmission and the risk of HCAIs.<sup>9</sup> However, few studies have investigated PHH in China, with some of them focusing on the role of patients as monitors or auditors in the improvement of HCW HH compliance.<sup>10</sup> Thus, the purpose of this cross-sectional study was to investigate inpatient knowledge, as well as the attitudes towards and practice of PHH during hospital stay, and to characterize and identify the factors influencing practice compliance. The results may contribute to the design of more successful PHH promotion strategies.

1  
2  
3  
4  
5 In this study, PHH was defined as HH practices performed by a patient on his or her own  
6 hands, including handwashing, and the use of alcohol-based hand rubs (ABHRs) and disinfecting  
7 wipes.<sup>9</sup> In certain situations, this care may have to be provided to patients by professional  
8 caregivers or family members.  
9  
10  
11  
12  
13  
14

## 15 **METHODS**

16  
17  
18 This cross-sectional, single-center study was performed at a 3500-bed university-affiliated  
19 medical hospital between November 2017 and December 2017. The study was approved by the  
20 hospital's institutional review board (No. 201708955).  
21  
22  
23  
24

### 25 **Participants**

26  
27  
28 The study was conducted in 71 clinical wards, including the departments of internal  
29 medicine, surgery, obstetrics and gynecology, pediatrics and infectious diseases, and intensive  
30 care units (ICUs). Outpatient wards, operating rooms, psychiatric wards, isolation wards, and  
31 emergency rooms were excluded.  
32  
33  
34  
35  
36  
37  
38

39 Patients were enrolled through a random sampling method using a random number table.  
40  
41 Firstly, data on the number of beds in each ward were obtained from the hospital management  
42 department, and a total of 3,000 of these beds met our inclusion criteria in terms of ward type.  
43  
44 Secondly, according to the largest sample size formula of simple random sampling, with values  
45 of  $\Pi=0.5$ ,  $\alpha=0.05$ , and  $\delta=0.05$ , a total sample size of 385 was obtained. After correction, the  
46  
47 required sample size was 342, but taking into consideration a no-response rate of 10%, a total of  
48  
49  
50  
51  
52  
53  
54  
55  
56  
57  
58  
59  
60

1  
2  
3  
4  
5 376 patients were required. Finally, patients from each ward were randomly selected using an 8:1  
6  
7  
8 proportion.  
9

10 Hospitalized patients who provided verbal informed consent and agreed to voluntarily  
11  
12 participate in this study were included. Exclusion criteria were: patients with an admission time  
13  
14 less than 24 hours, patients who did not return to their bed due to surgery or transfer to the ICU,  
15  
16 and those with mental status changes. Family members or caregivers were enrolled in the case of  
17  
18 patients with impaired consciousness, who were critically ill, or who were under the age of 14  
19  
20 years. Only family members who stayed with the patients in the wards for more than 1 day were  
21  
22 enrolled. Visitors, friends, and family members who had only short visits with the patients were  
23  
24 excluded. The nurses who were in charge of the eligible patients were selected.  
25  
26  
27  
28  
29  
30

### 31 **Questionnaires**

32  
33  
34 In this study, the survey instrument was a self-designed structured questionnaire that was  
35  
36 based on “When should you wash your hands” released by the CDC in 2016,<sup>11</sup> and the “Standard  
37  
38 for hand hygiene for health care workers in health care settings” issued by the National Health  
39  
40 Commission of the People's Republic of China in 2009.<sup>12</sup> Experts from the Department of  
41  
42 Infectious Diseases were also consulted in this regard. The questionnaire comprised two parts.  
43  
44  
45 The first part was designed to allow for the primary nurse to assess the elicited patient disease  
46  
47 information, such as diagnosis, whether surgery was performed, or if there was any infection  
48  
49 during the hospital stay.  
50  
51  
52  
53  
54  
55  
56  
57  
58  
59  
60



1  
2  
3  
4  
5 The second part pertaining to PHH was designed for patients and their families or  
6 caregivers, and comprises 4 sections. Section 1 pertained to patients' demographic data,  
7 including ward type, bed number, place of residence, income, and number of hospitalizations.  
8 Section 2 pertained to caregiver information, such as if the respondent is a family member or  
9 caregiver, his/her relationship with the patient, length of hospital stay, education, and occupation.  
10 Section 3 addressed PHH knowledge and attitudes, while Section 4 evaluated patients' practice  
11 of HH, including handwashing moments, steps, number of wash times daily, minutes taken every  
12 time, and ways in which hands were dried. The PHH moments were scaled as 'seldom',  
13 'sometimes', 'often', and 'always'. 'Not applicable' was selected for those who reported that  
14 they did not perform the procedure and therefore did not encounter that moment.  
15  
16  
17  
18  
19  
20  
21  
22  
23  
24  
25  
26  
27  
28  
29  
30

### 31 **Implementation**

32  
33  
34 The survey was conducted by eight research assistants, all of whom were team members  
35 who participated in all study meetings and discussions, who had knowledge on HH and its  
36 association with HCAI, and who had received unified training on how to fill out the  
37 questionnaire. The research assistants first obtained approval from the head nurses in the study  
38 wards, and then distributed questionnaires to the participants and provided instructions. The  
39 purpose of the study was explained to the respondents and informed verbal consent was obtained  
40 before investigation. Participants were informed that the questionnaire content would not involve  
41 invasive measurements or invade privacy, and would not cause injury to the body or mind. All  
42  
43  
44  
45  
46  
47  
48  
49  
50  
51  
52  
53  
54  
55  
56  
57  
58  
59  
60

1  
2  
3  
4  
5 eligible patients and their families/caregivers were informed that participation in the study was  
6  
7 voluntarily, and that refusal to participate or withdrawal from the study at any point for any  
8  
9 reason would not influence medical decisions. The participants were assured that their  
10  
11 information would only be used for research and that strict confidentiality would be maintained,  
12  
13 as well as that their data would not be used for business or other purposes without their  
14  
15 permission. The questionnaires were distributed and collected on the spot through SO JUMP (a  
16  
17 professional online questionnaire platform). A small gift (a piece of soap) valued at  
18  
19 approximately \$0.50 was given to each respondent who completed the questionnaire.  
20  
21  
22  
23  
24  
25

### 26 **Patient and public involvement**

27  
28  
29 The current study did not include patient and public involvement.  
30

### 31 **Statistical analysis**

32  
33  
34 Questionnaire data are presented as the number of participants and percentages. A  
35  
36 Kruskal-Wallis H test was applied to analyze the PHH implementation rate in the different  
37  
38 departments. Binary logistic regression analysis was used to identify the demographic predictors  
39  
40 for the respondents who had performed HH in the moment “after using the toilet, bedpan, or  
41  
42 commode”. Only those who responded “always” were included in the analysis. Univariate  
43  
44 analysis by non-conditional logistic regression was used to compare each demographic variable  
45  
46 in the different groups. Variables with a *P* value <.10 were further tested in the multivariate  
47  
48  
49  
50  
51  
52  
53  
54  
55  
56  
57  
58  
59  
60

1  
2  
3  
4  
5 logistic regression analysis by the enter method. A 2-tailed *P* value of 0.05 was considered  
6  
7  
8 statistically significant.  
9

## 10 **RESULTS**

### 11 **Population characteristics**

12  
13  
14  
15  
16 A total of 310 respondents, including 242 patients (78.1%) and 68 family members/  
17  
18 caregivers (21.9%), completed the questionnaire. The total response rate was 82.4% (310 of 376).  
19  
20  
21 The respondents' characteristics are summarized in Table 1. A total of 46.8% of the participants  
22  
23 were women, and most of them (86.8%) were married. The majority (79.7%) had a high school  
24  
25 education or lower. More than half of the participants (64.5%) were urban or town dwellers, and  
26  
27 a similar proportion (66.5%) had an annual income <50,000 RMB (~US\$7,987). Most  
28  
29 respondents (62.3%) had been hospitalized previously, and 27.7% reported having an infection at  
30  
31 present.  
32  
33  
34  
35

### 36 **Patients' performance of hand hygiene and their knowledge and attitudes**

37  
38  
39 Most of the participants (72.2%) reported that they did not know about HH or knew very  
40  
41 little about it. Less than half (47.4%) of the respondents had received HH education before; of  
42  
43 them, HCWs (95, 35.6%) and television (76, 28.5%) were the main resources. A majority  
44  
45 (94.2%) of the participants believed that handwashing was important for disease recovery, and  
46  
47 almost the same percentage (93.2%) of them believed that handwashing could prevent infection  
48  
49 spread among patients.  
50  
51  
52  
53  
54  
55  
56  
57  
58  
59  
60

1  
2  
3  
4  
5 More than half (62.2%) of the patients washed their hands less than 5 times a day, and  
6  
7  
8 approximately half (49.0%) of them spent less than 1 minute washing their hands every time.  
9  
10 Washing hands under flowing water (64.7%) was the main route of washing, compared to  
11  
12 washing in a basin or using ABHRs; however, only 13.4% and 25.6% of the patients used hand  
13  
14 sanitizers and soap, respectively. A total of 41.9% of the respondents reported that they had a  
15  
16 dedicated hand towel, but only 20.0% and 21.6%, respectively, chose a dedicated hand towel or  
17  
18 tissue to wipe their hands (Table 2).  
19  
20  
21  
22

### 23 **Patients' practice of the '7 steps to handwashing'**

24  
25  
26 The results of patients' practice of the '7 steps to handwashing' are displayed in  
27  
28 Supplemental figure 1. Most respondents washed their hands with adherence to the first step (rub  
29  
30 palms together: 96.45%, 299 of 310). More than half of them practiced the second step (rub the  
31  
32 back of both hands: 66.13%, 205 of 310) and third step (interlace fingers and rub hands together:  
33  
34 66.77%, 207 of 310). A slightly lower number of participants (56.77%, 176 of 310) adhered to  
35  
36 the seventh step (rub both wrists in a rotating manner). The implementation rates of the fourth  
37  
38 step (interlock fingers and rub the back of fingers of both hands: 26.77%, 83 of 310), and sixth  
39  
40 step (rub fingers on palm for both hands: 20.65%, 64 of 310) were lower. However, the fifth step  
41  
42 (rub thumb in a rotating manner followed by the area between index finger and thumb for both  
43  
44 hands) had the worst execution rate (17.74%, 55 of 310).  
45  
46  
47  
48  
49  
50

### 51 **Patient hand hygiene moments**

1  
2  
3  
4  
5 Three-quarters (75.8%; 235 of 310) of the respondents washed their hands after using the  
6 toilet/bedpan/commode, and 86.1% washed their hands when they were visibly dirty (Table 3).  
7  
8 Approximately half (47.7%) of the patients washed their hands before touching any breaks in the  
9 skin, whereas the implementation rates before any care procedures (19.0%, 59 of 310) and  
10 dialysis/contact with IV lines or other tubes (19.7%, 61 of 310) were low. The performance of  
11 handwashing before drinking fluids (11.0%, 34 of 310), as well as before and after interacting  
12 with visitors (11.9%, 37 of 310 vs 13.2%, 41 of 310) was also very low.  
13  
14  
15  
16  
17  
18  
19  
20  
21  
22  
23

### 24 **Patient hand hygiene moments in different departments**

25  
26 Participants in the Department of Internal Medicine had a relatively high execution rate of  
27 HH when their hands were visibly dirty (96.4%, 106 of 110), before eating (82.7%, 91 of 110),  
28 and before touching any breaks in the skin (71.8%, 79 of 110). Those in the Department of  
29 Surgery tended to wash their hands after using the toilet/bedpan/commode (94.4%, 136 of 144)  
30 and after coughing, sneezing, or touching the nose or mouth (50.7%, 73 of 144). Those in the  
31 Department of Infectious Diseases had good performance rates of handwashing before  
32 interacting with visitors (40.0%, 6 of 15) (Table 4). There were significant differences in this  
33 regard between the different departments in the Kruskal-Wallis H test ( $H=19.838$ ,  $P=0.001$ ).  
34  
35  
36  
37  
38  
39  
40  
41  
42  
43  
44  
45

### 46 **Significant predictors of PHH moments**

47  
48 A majority of the respondents (75.8%, 235 of 310) “Always” performed HH after using the  
49 toilet/ bedpan/commode (Table 5), and the univariate analysis identified one significant predictor:  
50  
51  
52  
53  
54  
55  
56  
57  
58  
59  
60

1  
2  
3  
4  
5 very few ICU patients practiced HH compared to medical patients (odds ratio [OR]= 0.08, 95%  
6 confidence interval [CI]: 0.02-0.41,  $P = 0.002$ ). In the multivariate analysis, we found two  
7  
8 significant variables: being a farmer rather than a clerk (adjusted OR= 0.18, 95% CI: 0.05-0.61,  
9  
10  $P = 0.004$ ) and being a freelancer (adjusted OR=0.18, 95% CI: (0.05-0.62,  $P = 0.007$ ). Medical  
11  
12 patients had a higher HH performance rate than those in the Department of  
13  
14 Obstetrics-Gynecology (adjusted OR= 0.18, 95% CI: 0.04-0.80,  $P = 0.02$ ) and ICU (adjusted  
15  
16 OR= 0.06, 95% CI: 0.01-0.45,  $P = 0.006$ ).  
17  
18  
19  
20  
21  
22

## 23 **DISCUSSION**

24  
25  
26 In the present study, we examined hospitalized patients' knowledge of, attitudes towards,  
27  
28 and practice of HH. Our findings demonstrate that patients' knowledge on HH is lacking;  
29  
30 although they are aware of the universal importance of HH practice, they clean their hands less  
31  
32 frequently in the hospital.  
33  
34  
35

36  
37 Although patients had a positive attitude towards HH, their knowledge was insufficient. A  
38  
39 majority of the participants (94.2%) held the view that handwashing was important for recovery  
40  
41 from disease, and most of them (93.2%) believed that handwashing could prevent the  
42  
43 development of infection; however, more than half (52.6%) of the respondents did not receive  
44  
45 HH education, and only 13.5% patients had complete awareness on HH. Our findings differ from  
46  
47 those of Nabavi et al.,<sup>13</sup> who found that while Iranian residents had a moderate knowledge of HH,  
48  
49 their attitudes toward the various aspects of HCAI were negative. This could be attributed to the  
50  
51  
52  
53  
54  
55  
56  
57  
58  
59  
60

1  
2  
3  
4  
5 fact that the present study's hospital attaches great importance to HCW HH and has implemented  
6 the WHO's multimodal HH improvement strategies;<sup>14</sup> therefore, the study participants were in an  
7 atmosphere in which the importance of HH is highlighted daily, leading them to believe in its  
8 importance. However, due to their poor educational background and non-provision of  
9 information by HCWs, they were unaware of why HH was important. Therefore, inpatients need  
10 to receive better training on HH if the rates of HCAI are to be lowered.  
11  
12  
13  
14  
15  
16  
17  
18  
19  
20

21 Patients' performance of standard HH (step, frequency, duration) is poor, and the existing  
22 facilities and products are routinely underutilized. Only 17.7% (55 of 310) of patients washed  
23 their fingertips and 20.6% (55 of 310) washed their thumbs, consistent with the findings of  
24 previous studies.<sup>15</sup> Although the WHO's multimodal HH improvement strategies have been  
25 implemented by our hospital's Infection Control Committee with the provision of sinks and wash  
26 basins for the performance of soap-and-water cleaning in every patient's room, and the provision  
27 of ABHR for waterless hand cleaning in the rooms and corridors for all HCWs and patients,<sup>14</sup> the  
28 frequency and duration of handwashing were not satisfactory in this study. Among all  
29 participants, 62.2% washed their hands less than 5 times every day and 49.0% spent less than 1  
30 minute every time. Moreover, 35.3% of patients washed their hands without running water, and  
31 only 13.4%, 25.6% and 14.4% used hand sanitizers, soap and ABHR, respectively. Previous  
32 studies demonstrated that washing hands with soap and water or ABHR is more effective than  
33 washing with tap water alone in removing pathogens,<sup>16</sup> and that providing staff education on the  
34  
35  
36  
37  
38  
39  
40  
41  
42  
43  
44  
45  
46  
47  
48  
49  
50  
51  
52  
53  
54  
55  
56  
57  
58  
59  
60

1  
2  
3  
4  
5 importance of PHH in infection prevention can improve PHH performance.<sup>17</sup> Therefore, staff  
6  
7  
8 should receive education on the importance of PHH in the prevention of hospital-acquired  
9  
10  
11 infection; second, staff need to be instructed to provide verbal PHH education to all newly  
12  
13 admitted patients, and to provide reminders, assistance, and encouragement for PHH practice.<sup>18</sup>  
14  
15  
16 In addition, it is also important to ensure that HH products—such as alcohol-based hand wipes or  
17  
18 ABHR—are accessible to patients who are bedridden and are unable to get to the sink.<sup>19</sup> Staff or  
19  
20  
21 family members should be instructed to provide assistance to improve PHH opportunities.<sup>18</sup> The  
22  
23 use of a personalized verbal electronic audio reminder (EAR) has previously been suggested to  
24  
25  
26 improve PHH while minimizing increases in the workload of HCWs.<sup>20</sup>  
27  
28

29  
30  
31 Hands were washed most frequently when they were visibly dirty and after using the toilet,  
32  
33 but less frequently before drinking fluids and taking medicine, which would be the optimal time  
34  
35 for the prevention of fecal-oral transmission. In this study, 75.8% of the participants washed their  
36  
37 hands after using the toilet/bedpan/commode, but only 11.0% of them washed their hands before  
38  
39 drinking fluids. Similar results have been observed in other study on patients in transplant  
40  
41 units.<sup>21</sup> This may be because some patients may believe that their hands do not require washing  
42  
43 until they are visibly dirty, and that simple contact does not require handwashing; others may not  
44  
45  
46 have awareness of optimal HH habits.<sup>20</sup> Hospital environments are often contaminated with  
47  
48  
49 hospital-acquired pathogens,<sup>16-18</sup> therefore, there is a need for education campaigns aimed at  
50  
51  
52  
53  
54  
55  
56  
57  
58  
59  
60



1  
2  
3  
4  
5 patient-initiated HH and HH that is directly observed before meals and the intake of medications  
6  
7  
8 during hospitalization.<sup>22</sup>  
9

10 Our results also revealed that only 11.9% of the patients washed their hands before  
11  
12 interacting with visitors and 13.2% washed their hands after the visitors left. Visitors may be  
13  
14 vectors of pathogenic organisms that are potentially dangerous, particularly to  
15  
16 immunocompromised patients.<sup>23</sup> If visitors carry certain pathogenic organisms on their hands  
17  
18 and do not perform HH upon entry to the hospital, vulnerable patient populations may be at an  
19  
20 increased risk for infection if they do not wash their hands after the visitors leave.<sup>24</sup> Similarly, if  
21  
22 patients carrying pathogenic bacteria do not wash their hands before contact with visitors, the  
23  
24 risk of visitors developing infection increases, leading to the spread of pathogens that may be a  
25  
26 threat to public health. Thus, to win the battle against HCAs, there is a need for coordinated  
27  
28 effort to enforce HH that includes patients, as well as their families, and visitors.<sup>25</sup> In addition to  
29  
30 providing better signage and education among care providers<sup>26,27</sup>, other hospital approaches,  
31  
32 such as the installation of more strict visiting infrastructure (i.e., ICU doors that will not open if  
33  
34 ABHR is not used) might be considered.<sup>23</sup>  
35  
36  
37  
38  
39  
40  
41  
42  
43

44 The present study resulted in some significant findings, the most significant being that ICU  
45  
46 patients rarely practice HH compared to those in other departments. This is not surprising as  
47  
48 patients in the ICU are generally critically ill or unconsciousness, and they cannot wash their  
49  
50 hands by themselves. Even the assistance of professional caregivers does not seem to work. This  
51  
52  
53  
54  
55  
56  
57  
58  
59  
60

1  
2  
3  
4  
5 suggests the importance of the role of caregivers in ensuring adequate HH in such functionally  
6  
7  
8 dependent patients. To the best of our knowledge, this study is the first to provide data on ICU  
9  
10  
11 PHH, since most previous studies on ICU HH focused on HCWs or patients' families.<sup>23,28</sup>  
12  
13 Considering that multidrug-resistant acinetobacter baumannii infection are highly in ICU <sup>29</sup> and  
14  
15 ICU patients are the most susceptible populations to nosocomial infections,<sup>30</sup> attention must be  
16  
17 given to improving their adherence to HH rules to reduce hospital infections.  
18  
19

20  
21 Our study has several limitations. First, since this is a single-center cross-sectional survey,  
22  
23 our results may not be applicable to all other institutions. Thus, it is recommended that a  
24  
25 multi-center study with a large sample size be conducted in the future. Second, our inclusion of  
26  
27 certain patients and wards may have resulted in selection bias. Physically weak patients were  
28  
29 also recruited in the present study, and their families or caregivers filled out the questionnaire;  
30  
31 therefore, there is a possibility that the family members of caregivers may have provided  
32  
33 information on their own HH situation rather than that of the patients. Therefore, there is a need  
34  
35 for further observational studies including quantitative hand bacterial cultures to verify the  
36  
37 results of this study. Nonetheless, we believe that this study included a representative sample of  
38  
39 inpatients. Third, the study was conducted using a convenience sampling method in the category  
40  
41 of family members. Finally, our questionnaire was not pretested.  
42  
43  
44  
45  
46  
47  
48  
49  
50  
51  
52  
53  
54  
55  
56  
57  
58  
59  
60

## CONCLUSIONS

In conclusion, this study demonstrated that HH is considered important by most patients. However, their levels of knowledge and practice were unsatisfactory. These results suggest that multifaceted and dedicated efforts are needed to correct this knowledge and behavior. In addition, special attention should be given to those HH moments the compliance rates to which were the lowest, such as before drinking fluids, as well as before interacting with visitors and after they leave.

## Acknowledgments

The authors thank Li Hao RN, Luo Zi-zhao RN, Zhong Xu RN, Luo Yan RN and Hu Chun-Ping RN for their assistance with data collection, as well as the ward nurse leaders, nursing staff, and patients of the hospital for their willingness to participate. We also would like to thank Editage [www.editage.cn] for English language editing.

## Footnotes

**Contributors:** LYX and YSE contributed to the study conception and design, data collection, analysis, interpretation and drafting the manuscript. LYH and CC contributed to the data collection and data management. MD contributed to the study design, data acquisition and interpretation. All authors critically revised the manuscript and approved the final version.

**Competing interests:** None declared.

**Funding:** This research did not receive any specific grant from funding agencies in the public, commercial, or not-for-profit sectors.

**Ethics approval:** The study was approved by the Institutional Review Board of Xiangya Hospital, Central South University (No. 201708955).

**Data sharing statement:** Extra data can be extracted by emailing the corresponding author YSE.

## References

1. Seymour CW, Liu VX, Iwashyna TJ, Brunkhorst FM, Rea TD, Scherag A, et al. Assessment of clinical criteria for sepsis: For the Third International Consensus Definitions for Sepsis and Septic Shock (Sepsis-3). *JAMA* 2016;315:762-74. doi: 10.1001/jama.2016.0288
2. Fleischmann C, Scherag A, Adhikari NK, Hartog CS, Tsaganos T, Schlattmann P, et al. Assessment of Global incidence and mortality of hospital-treated sepsis. Current estimates and limitations. *Am J Respir Crit Care Med* 2016;193:259-72. doi: 10.1164/rccm.201504-0781OC.
3. Boyce J M, Didier P. Guideline for hand hygiene in health-care settings: Recommendations of the Healthcare Infection Control Practices Advisory Committee and the HICPAC/ SHEA/ APIC/ IDSA Hand Hygiene Task Force. *Infect Control Hosp Epidemiol* 2002;30:S3-S40.
4. Pittet D, Allegranzi B, Boyce J. The World Health Organization Guidelines on Hand Hygiene in Health Care and Their Consensus Recommendations. *Infect Control Hosp Epidemiol* 2009;30:611-22. doi: 10.1086/600379.2009;30:611-22.
5. Saito H, Borzykowski T, Kilpatrick C, Pires D, Allegranzi B, Pittet D. "It's in your hands - prevent sepsis in health care"; 5 May 2018 World Health Organization (WHO) SAVE LIVES: Clean Your Hands campaign. *Am J Infect Control* 2018;39:1-2. doi: 10.1016/j.ajic.2018.02.006.
6. Meng X, Liu S, Duan J, et al. Risk factors and medical costs for healthcare-associated carbapenem-resistant *Escherichia coli* infection among hospitalized patients in a Chinese teaching hospital. *Bmc Infectious Diseases* 2017; 17(1): 82. doi:10.1186/s12879-016-2176-9.

- 1  
2  
3  
4  
5  
6  
7  
8  
9  
10  
11  
12  
13  
14  
15  
16  
17  
18  
19  
20  
21  
22  
23  
24  
25  
26  
27  
28  
29  
30  
31  
32  
33  
34  
35  
36  
37  
38  
39  
40  
41  
42  
43  
44  
45  
46  
47  
48  
49  
50  
51  
52  
53  
54  
55  
56  
57  
58  
59  
60
7. Li C, Duan J, Liu S, et al. Assessing the risk and disease burden of *Clostridium difficile* infection among patients with hospital-acquired pneumonia at a University Hospital in Central China. *Infection* 2017; 45(5): 621-628. doi: 10.1007/s15010-017-1024-1.
  8. Cao W, Zhou R, Ou X, et al. Prevalence of hepatitis B virus, hepatitis C virus, human immunodeficiency virus and *Treponema pallidum* infections in hospitalized patients before transfusion in Xiangya hospital Central South University, China from 2011 to 2016. *BMC Infectious Diseases* 2018; 18: 145. doi: 10.1186/s12879-018-3051-7.
  9. Landers T, Abusalem S, Coty MB, Bingham J. Patient-centered hand hygiene: the next step in infection prevention. *Am J Infect Control* 2012;40:S11-S17. doi: 10.1016/j.ajic.2012.02.006.
  10. Alzyood M, Jackson D, Brooke J, Aveyard H. An integrative review exploring the perceptions of patients and healthcare professionals towards patient involvement in promoting hand hygiene compliance in the hospital setting. *J Clin Nurs* 2018;27:1329-45. doi: 10.1111/jocn.14305.
  11. <https://www.cdc.gov/handwashing/when-how-handwashing.html>
  12. National Health Commission of the People's Republic of China. "Standard for hand hygiene for healthcare workers in healthcare settings" [S]. [2009-04-01/ 2009-12-01].  
<http://www.nhfpc.gov.cn/zhuz/s9496/200904/40118/files/5fe4afce5b874512a9780c724a4d5be0.pdf>

- 1  
2  
3  
4  
5  
6  
7  
8  
9  
10  
11  
12  
13  
14  
15  
16  
17  
18  
19  
20  
21  
22  
23  
24  
25  
26  
27  
28  
29  
30  
31  
32  
33  
34  
35  
36  
37  
38  
39  
40  
41  
42  
43  
44  
45  
46  
47  
48  
49  
50  
51  
52  
53  
54  
55  
56  
57  
58  
59  
60
13. Mahmoud N, Mostafa AM, Latif G, Mohammad M. Knowledge, attitudes, and practices study on hand hygiene among Imam Hossein Hospital's residents in 2013. *Iran Red Crescent Med J* 2015;17:e19606. doi: 10.5812/ircmj.19606.
14. World Health Organization. A guide to the implementation of the WHO multimodal hand hygiene improvement strategy. Geneva, Switzerland: World Health Organization; 2009.
15. Taylor LJ. An evaluation of hand washing techniques. *Nurs Times* 1978;74:108-10.
16. Huang GKL, Stewardson AJ, Grayson ML. Back to basics: hand hygiene and isolation. *Curr Opin Infect Dis* 2014;27:379-89. doi: 10.1097/QCO.0000000000000080
17. Ardizzzone LL, Smolowitz J, Kline N, Thorn B, Larson EL. Patient hand hygiene practices in surgical patients. *Am J Infect Control* 2013;41:487-91. doi: 10.1016/j.ajic.2012.05.029
18. Pokrywka M, Buraczewski M, Frank D, Dixon H, Ferrelli J, Shutt K, et al. Can improving patient hand hygiene impact *Clostridium difficile* infection events at an academic medical center? *Am J Infect Control* 2017;45:959-63. doi: 10.1016/j.ajic.2017.06.019
19. Mac W, Kiernan M, Wilson J, Loveday H, Bradley C. Assessment of the efficacy of a patient hand wipe: development of a test method. *J Hosp Infect* 2017;98:339-44. doi: 10.1016/j.jhin.2017.08.013
20. Knighton SC, Dolansky M, Donskey C, Warner C, Rai H, Higgins PA. Use of a verbal electronic audio reminder with a patient hand hygiene bundle to increase independent patient

1  
2  
3  
4  
5 hand hygiene practices of older adults in an acute care setting. *Am J Infect Control*

6  
7  
8 2018;46:610-6. doi: 10.1016/j.ajic.2018.01.005

9  
10 21. Srigley JA, Furness CD, Gardam M. Measurement of patient hand hygiene in multi-organ  
11 transplant units using a novel technology: an observational study. *Infect Control Hosp Epidemiol*  
12 2014;35:1336-41. doi: 10.1086/678419.

13  
14  
15  
16 22. Rai H, Knighton S, Zabarsky TF, Donskey CJ. Comparison of ethanol hand sanitizer versus  
17 moist towelette packets for mealtime patient hand hygiene. *Am J Infect Control* 2017;45:1033-4.  
18  
19  
20  
21  
22  
23  
24  
25  
26  
27  
28  
29  
30  
31  
32  
33  
34  
35  
36  
37  
38  
39  
40  
41  
42  
43  
44  
45  
46  
47  
48  
49  
50  
51  
52  
53  
54  
55  
56  
57  
58  
59  
60  
doi: 10.1016/j.ajic.2017.03.018.

23. Birnbach DJ, Rosen LF, Fitzpatrick M, Arheart KL, Munoz-Price LS. An evaluation of hand  
hygiene in an intensive care unit: Are visitors a potential vector for pathogens? *J Infect Public*  
*Health* 2015;8:570-4. doi: 10.1016/j.jiph.2015.04.027.

24. Okada J, Yamamizu Y, Fukai K. Effectiveness of hand hygiene depends on the patient's  
health condition and care environment. *Jpn J Nurs Sci* 2016;13:413-23.  
doi: 10.1111/jjns.12122

25. Randle J, Arthur A, Vaughan N. Twenty-four hour observational study of hospital hand  
hygiene compliance. *J Hosp Infect* 2010;76:252-5. doi: 10.1016/j.jhin.2010.06.027

26. Lei J H, Guo Y J, Chen Z, et al. Problem/case-based learning with competition introduced in  
severe infection education: an exploratory study. *Springerplus* 2016; 5(1):1821. doi:  
10.1186/s40064-016-3532-3.



1  
2  
3  
4  
5 27. Xie J, Ming Y, Ding S, et al. Rising Need for Health Education Among Renal Transplant  
6 Patients and Caregiving Competence in Care Providers. *Progress in Transplantation* 2017;  
7  
8 27(2):180. doi: 10.1177/1526924817699962.  
9  
10

11  
12  
13 28. Scheithauer S, Oude-Aost J, Heimann K, Haefner H, Schwanz T, Waitschies B, et al. Hand  
14 hygiene in pediatric and neonatal intensive care unit patients: daily opportunities and indication-  
15 and profession-specific analyses of compliance. *Am J Infect Control* 2011;39:732-7.  
16  
17 doi:10.1016/j.ajic.2010.12.020.  
18  
19

20  
21 29. He L, Meng J, Huang D, et al. Multidrug-resistant *Acinetobacter Baumannii* infection in  
22 Intensive Care Unit: A retrospective analysis. *Zhong nan da xue xue bao. Yi xue ban = Journal*  
23 of Central South University. *Medical sciences* 2015; 40(12):1327-1332. doi:  
24  
25 10.11817/j.issn.1672-7347.2015.12.007.  
26  
27

28  
29 30. Zhou P, Xiong X, Li C, Wu A. Association of Length of Stay With Contamination of  
30 Multidrug-Resistant Organisms in the Environment and Colonization in the Rectum of Intensive  
31 Care Unit Patients in China. *Infect Control Hosp Epidemiol* 2016; 37(1):120-1.  
32  
33 doi: 10.1017/ice.2015.282.  
34  
35  
36  
37  
38  
39  
40  
41  
42  
43  
44  
45  
46  
47  
48  
49  
50  
51  
52  
53  
54  
55  
56  
57  
58  
59  
60

**Table 1** Demographic characteristics of the 310 patients and their family members or caregivers.

| Characteristic             | Participants (%) |
|----------------------------|------------------|
| Identity                   |                  |
| Patient                    | 242 (78.1)       |
| Family members/caregivers  | 68 (21.9)        |
| Sex                        |                  |
| Female                     | 145 (46.8)       |
| Male                       | 165 (53.2)       |
| Age, years                 |                  |
| <30                        | 57 (18.4)        |
| 30-39                      | 34 (11.0)        |
| 40-49                      | 56 (18.1)        |
| 50-59                      | 72 (23.2)        |
| ≥60                        | 91 (29.4)        |
| Marital status             |                  |
| Unmarried                  | 36 (11.6)        |
| Married                    | 269 (86.8)       |
| Divorced                   | 1 (0.3)          |
| Widowed                    | 4 (1.3)          |
| Education level            |                  |
| Primary or below           | 77 (24.8)        |
| Junior high school         | 88 (28.4)        |
| Senior high school         | 62 (20.0)        |
| Technical secondary school | 20 (6.5)         |
| College                    | 34 (11.0)        |
| Undergraduate              | 28 (9.0)         |
| Postgraduate or above      | 1 (0.3)          |
| Occupation                 |                  |
| Farmer                     | 67 (21.6)        |
| Worker                     | 27 (8.7)         |
| Clerk                      | 47 (15.2)        |
| Medical staff              | 2 (0.6)          |
| Teacher                    | 3 (1.0)          |
| Student                    | 13 (4.2)         |
| Freelancer                 | 34 (11.0)        |
| Unemployed                 | 45 (14.5)        |
| Retiree                    | 72 (23.2)        |
| Place of residence         |                  |

1  
2  
3  
4  
5  
6  
7  
8  
9  
10  
11  
12  
13  
14  
15  
16  
17  
18  
19  
20  
21  
22  
23  
24  
25  
26  
27  
28  
29  
30  
31  
32  
33  
34  
35  
36  
37  
38  
39  
40  
41  
42  
43  
44  
45  
46  
47  
48  
49  
50  
51  
52  
53  
54  
55  
56  
57  
58  
59  
60

|                                  |            |
|----------------------------------|------------|
| Urban                            | 147 (47.4) |
| Town                             | 53 (17.1)  |
| Village                          | 110 (35.5) |
| Income (RMB/year)†               |            |
| <50,000                          | 206 (66.5) |
| 50,000~100,000                   | 80 (25.8)  |
| 100,000~200,000                  | 18 (5.8)   |
| >200,000                         | 6 (1.9)    |
| Number of hospitalizations       |            |
| 1                                | 117 (37.7) |
| 2                                | 74 (23.9)  |
| ≥3                               | 119 (38.4) |
| Ward                             |            |
| Medical ward                     | 110 (35.5) |
| Surgical ward                    | 144 (46.5) |
| Obstetrics/gynecology ward       | 23 (7.4)   |
| Pediatric ward                   | 9 (2.9)    |
| Infectious diseases ward         | 15 (4.8)   |
| Intensive care unit              | 9 (2.9)    |
| Was surgery performed this time? |            |
| Yes                              | 132 (42.6) |
| No                               | 178 (57.4) |
| Is there any infection?          |            |
| Yes                              | 86 (27.7)  |
| No                               | 224 (72.3) |

---

† 50,000 RMB ≈ US\$7,209

**Table 2** Performance of hand hygiene and knowledge and attitudes among the 310 patients and their family members or caregivers.

| Items                                                    | Total n(%) |
|----------------------------------------------------------|------------|
| <b>Knowledge and attitude</b>                            |            |
| Have you received any education related to hand hygiene? |            |
| Yes                                                      | 147 (47.4) |
| No                                                       | 163 (52.6) |
| Hand hygiene knowledge sources                           |            |
| Television                                               | 76 (28.5)  |
| Newspaper                                                | 20 (7.5)   |
| Magazine                                                 | 18 (6.7)   |
| Internet                                                 | 37 (13.9)  |
| Medical staff                                            | 95 (35.6)  |
| Other                                                    | 21 (7.9)   |
| Do you know anything about hand hygiene?                 |            |
| Don't know                                               | 126 (40.6) |
| A little                                                 | 98 (31.6)  |
| Most                                                     | 44 (14.2)  |
| All                                                      | 42 (13.5)  |
| Is handwashing important for recovery from disease?      |            |
| Yes                                                      | 292 (94.2) |
| No                                                       | 18 (5.8)   |
| Can handwashing prevent infection in patients?           |            |
| Yes                                                      | 289 (93.2) |
| No                                                       | 21 (6.8)   |
| <b>Performance</b>                                       |            |
| How many times do you wash your hands every day?         |            |
| ≤2                                                       | 48 (15.5)  |
| 3~5                                                      | 145 (46.8) |
| 6~10                                                     | 69 (22.3)  |
| >10                                                      | 48 (15.5)  |
| How long does it take to wash your hands every time?     |            |
| <1 min                                                   | 152 (49.0) |
| 1~2 min                                                  | 135 (43.5) |
| ≥ 2 min                                                  | 23 (7.4)   |
| Handwashing ways                                         |            |
| Wash basin                                               | 560(18.9)  |
| Flowing water                                            | 1913(64.7) |

1  
2  
3  
4  
5  
6  
7  
8  
9  
10  
11  
12  
13  
14  
15  
16  
17  
18  
19  
20  
21  
22  
23  
24  
25  
26  
27  
28  
29  
30  
31  
32  
33  
34  
35  
36  
37  
38  
39  
40  
41  
42  
43  
44  
45  
46  
47  
48  
49  
50  
51  
52  
53  
54  
55  
56  
57  
58  
59  
60

|                                      |            |
|--------------------------------------|------------|
| Alcohol-based hand rub               | 484(16.4)  |
| Handwashing products                 |            |
| Tap water only                       | 1797(46.6) |
| Hand sanitizer                       | 516(13.4)  |
| Soap                                 | 987(25.6)  |
| Alcohol-based hand rub               | 555(14.4)  |
| Ways in which you wipe your hands    |            |
| Hand towel                           | 976(20.0)  |
| Any towel                            | 819(17.5)  |
| Disposable tissues                   | 1012(21.6) |
| Clothes on my body                   | 410(8.8)   |
| Wave hands in the air                | 873(18.7)  |
| Face towel                           | 588(12.6)  |
| Do you have a dedicated hand towel?  |            |
| Yes                                  | 130 (41.9) |
| No                                   | 180 (58.1) |
| Times of hand towel washes every day |            |
| 0                                    | 10(7.7)    |
| 1                                    | 32(24.6)   |
| 2                                    | 29(22.3)   |
| 3                                    | 25(19.2)   |
| 4                                    | 27(20.8)   |
| Wash once every few days             | 7(5.4)     |

---

**Table 3** Patient hand hygiene moments.

| <b>Moments</b>                                                                         | <b>Seldom<br/>n(%)</b> | <b>Sometimes<br/>n(%)</b> | <b>Often<br/>n(%)</b> | <b>Always<br/>n(%)</b> | <b>Not<br/>applicable†</b> |
|----------------------------------------------------------------------------------------|------------------------|---------------------------|-----------------------|------------------------|----------------------------|
| 1. After using the toilet, bedpan, or commode                                          | 21(6.8)                | 15(4.8)                   | 39(12.6)              | 235(75.8)              | 0(0.0)                     |
| 2. When returning to the room after a test or procedure                                | 91(29.4)               | 43(13.8)                  | 54(17.4)              | 120(38.7)              | 0(0.0)                     |
| 3. Before eating                                                                       | 41(13.2)               | 37(11.9)                  | 68(21.9)              | 164(52.9)              | 0(0.0)                     |
| 4. Before drinking fluids                                                              | 160(51.6)              | 63(20.3)                  | 53(17.1)              | 34(11.0)               | 0(0.0)                     |
| 5. Before taking medicine                                                              | 130(41.9)              | 49(15.8)                  | 62(20.0)              | 66(21.3)               | 3(0.9)                     |
| 6. When visibly dirty                                                                  | 11(3.5)                | 9(2.9)                    | 23(7.4)               | 267(86.1)              | 0(0.0)                     |
| 7. Before touching any breaks in the skin<br>(e.g., wounds, dressing, tubes)           | 56(18.1)               | 36(11.6)                  | 61(19.7)              | 147(47.4)              | 10(3.1)                    |
| 8. Before any care procedures<br>(e.g., dialysis, IV‡ drug administration, injections) | 145(46.8)              | 54(17.4)                  | 52(16.8)              | 59(19.0)               | 0(0.0)                     |
| 9. Before dialysis, contact with IV lines or other tubes                               | 139(44.8)              | 60(19.4)                  | 44(14.2)              | 61(19.7)               | 6(1.9)                     |
| 10. After coughing, sneezing, or touching nose or mouth                                | 102(32.9)              | 61(19.7)                  | 61(19.7)              | 86(27.7)               | 0(0.0)                     |
| 11. Before interacting with visitors                                                   | 198(63.8)              | 37(11.9)                  | 38(12.3)              | 37(11.9)               | 0(0.0)                     |
| 12. After visitors leave                                                               | 190(61.3)              | 46(14.8)                  | 33(10.6)              | 41(13.2)               | 0(0.0)                     |
| 13. When there is concern about whether hands are clean                                | 78(25.1)               | 57(18.4)                  | 83(26.8)              | 87(28.1)               | 5(1.5%)                    |

† “Not applicable” represents patients who reported that they did not perform the procedure and therefore did not encounter that moment.

‡ “IV” intravenous.

**Table 4** Patients who “always” or “often” practiced hand hygiene in the different departments.

| Moments                                                                             | Medical<br>Wards<br>n/N(%) | Surgical<br>Wards<br>n/N(%) | Obstetrics/<br>gynecology<br>wards<br>n/N(%) | Pediatric<br>wards<br>n/N(%) | Infectious<br>diseases<br>wards<br>n/N(%) | ICU†<br>n/N(%) | Total<br>n/N(%) |
|-------------------------------------------------------------------------------------|----------------------------|-----------------------------|----------------------------------------------|------------------------------|-------------------------------------------|----------------|-----------------|
| 1. After using the toilet, bedpan, or commode                                       | 99/110(90.0)               | 136/144(94.4)               | 19/23(82.6)                                  | 7/9(77.8)                    | 10/15(66.7)                               | 3/9(33.3)      | 274/310(88.4)   |
| 2. When returning to the room after a test or procedure                             | 71/110(64.5)               | 75/144(52.1)                | 12/23(52.2)                                  | 7/9(77.8)                    | 7/15(46.7)                                | 2/9(22.2)      | 174/310(56.1)   |
| 3. Before eating                                                                    | 91/110(82.7)               | 108/144(75.0)               | 15/23(65.2)                                  | 7/9(77.8)                    | 9/15(60.0)                                | 2/9(22.2)      | 232/310(74.8)   |
| 4. Before drinking fluids                                                           | 35/110(31.8)               | 38/144(26.4)                | 4/23(17.4)                                   | 4/9(44.4)                    | 5/15(33.3)                                | 1/9(11.1)      | 87/310(28.1)    |
| 5. Before taking medicine                                                           | 45/110(40.9)               | 59/144(41.0)                | 12/23(52.2)                                  | 6/9(66.7)                    | 4/15(26.7)                                | 2/9(22.2)      | 128/310(41.3)   |
| 6. When visibly dirty                                                               | 106/110(96.4)              | 138/144(95.8)               | 22/23(95.7)                                  | 7/9(77.8)                    | 12/15(80.0)                               | 5/9(55.6)      | 290/310(93.5)   |
| 7. Before touching any breaks in the skin (e.g., wounds, dressing, tubes)           | 79/110(71.8)               | 98/144(68.1)                | 15/23(65.2)                                  | 5/9(55.6)                    | 9/15(60.0)                                | 2/9(22.2)      | 75/310(24.2)    |
| 8. Before any care procedures (e.g., dialysis, IV‡ drug administration, injections) | 41/110(37.3)               | 51/144(35.4)                | 8/23(34.8)                                   | 4/9(44.4)                    | 5/15(33.3)                                | 2/9(22.2)      | 111/310(35.8)   |
| 9. Before dialysis, contact with IV lines or other tubes                            | 37/110(33.6)               | 49/144(34.0)                | 9/23(39.1)                                   | 4/9(44.4)                    | 4/15(26.7)                                | 2/9(22.2)      | 105/310(33.9)   |
| 10. After coughing, sneezing, or touching the nose or mouth                         | 51/110(46.4)               | 73/144(50.7)                | 10/23(43.5)                                  | 4/9(44.4)                    | 7/15(46.7)                                | 2/9(22.2)      | 147/310(47.4)   |
| 11. Before interacting with visitors                                                | 23/110(20.9)               | 34/144(23.6)                | 8/23(34.8)                                   | 3/9(33.3)                    | 6/15(40.0)                                | 1/9(11.1)      | 75/310(24.2)    |
| 12. After visitors leave                                                            | 25/110(22.7)               | 32/144(22.2)                | 5/23(21.7)                                   | 4/9(44.4)                    | 6/15(40.0)                                | 2/9(22.2)      | 74/310(23.9)    |
| 13. When there is concern about whether hands are clean                             | 66/110(60.0)               | 72/144(50.0)                | 13/23(56.5)                                  | 6/9(66.7)                    | 9/15(60.0)                                | 4/9(44.4)      | 170/310(54.8)   |
| Kruskal-Wallis H                                                                    | 574.47                     | 556.01                      | 548.99                                       | 669.5                        | 535.47                                    | 196.56         | 19.838          |
| P-value                                                                             |                            |                             |                                              |                              |                                           |                | 0.001           |

† ICU, intensive care unit; ‡ IV, intravenous.

**Table 5** Identity of participants who “always” performed hand hygiene after using the toilet, bedpan, or commode using the characteristics of the patients and their family members of caregivers.

| Characteristic             | “Always” perform hand hygiene<br>n/N (%) | Unadjusted OR <sup>†</sup> |         | Adjusted OR |         |
|----------------------------|------------------------------------------|----------------------------|---------|-------------|---------|
|                            |                                          | OR (95%CI) <sup>‡</sup>    | P-value | OR (95% CI) | P-value |
| Identity                   |                                          |                            |         |             |         |
| Patient                    | 186/242(76.9)                            | 1                          |         |             |         |
| Family members/caregivers  | 49/68(72.1)                              | 0.78(0.42-1.43)            | 0.42    |             |         |
| Sex                        |                                          |                            |         |             |         |
| Male                       | 125/165(75.8)                            | 1                          |         |             |         |
| Female                     | 110/145(75.9)                            | 1.01(0.60-1.69)            | 0.98    |             |         |
| Age, years                 |                                          |                            |         |             |         |
| <30                        | 39/57(68.4)                              | 1                          |         |             |         |
| 30-39                      | 28/34(82.4)                              | 2.15(0.76-6.12)            | 0.15    |             |         |
| 40-49                      | 43/56(76.8)                              | 1.39(0.61-3.15)            | 0.44    |             |         |
| 50-59                      | 54/72(75.0)                              | 1.49(0.69-3.26)            | 0.31    |             |         |
| ≥60                        | 71/91(78.9)                              | 1.64(0.78-3.46)            | 0.20    |             |         |
| Marriage                   |                                          |                            |         |             |         |
| Unmarried                  | 26/36(72.2)                              | 1                          |         |             |         |
| Married                    | 205/269(76.2)                            | 1.23(0.56-2.69)            | 0.60    |             |         |
| Divorced                   | 1/1(100)                                 | /                          | 1.00    |             |         |
| Death of a spouse          | 3/4(75.0)                                | 1.15(0.11-12.44)           | 0.91    |             |         |
| Education level            |                                          |                            |         |             |         |
| Primary or below           | 59/77(76.6)                              | 1                          |         |             |         |
| Junior high school         | 59/88(67.0)                              | 0.62(0.31-1.24)            | 0.18    |             |         |
| Senior high school         | 51/62(82.3)                              | 1.41(0.61-3.27)            | 0.42    |             |         |
| Technical secondary school | 14/20(70.0)                              | 0.71(0.24-2.12)            | 0.54    |             |         |
| College                    | 28/34(82.4)                              | 1.42(0.51-3.98)            | 0.50    |             |         |
| Undergraduate              | 23/28(82.1)                              | 1.40(0.47-4.22)            | 0.55    |             |         |



|    |                            |               |                  |      |                 |       |
|----|----------------------------|---------------|------------------|------|-----------------|-------|
| 1  |                            |               |                  |      |                 |       |
| 2  |                            |               |                  |      |                 |       |
| 3  | Postgraduate or above      | 1/1(100)      | /                | 1.00 |                 |       |
| 4  | Occupation                 |               |                  |      |                 |       |
| 5  |                            |               |                  |      |                 |       |
| 6  | Farmer                     | 56/67(83.6)   | 1                |      | 1               |       |
| 7  | Worker                     | 23/27(85.2)   | 1.13(0.33-3.92)  | 0.85 | 0.85(0.21-3.39) | 0.82  |
| 8  | Clerk                      | 34/47(72.3)   | 0.51(0.21-1.28)  | 0.15 | 0.18(0.05-0.61) | 0.006 |
| 9  | Medical staff              | 2/2(100)      | /                | 1.00 | /               | 1.00  |
| 10 | Teacher                    | 2/3(66.7)     | 0.39(0.03-4.72)  | 0.46 | 0.15(0.01-2.26) | 0.17  |
| 11 | Student                    | 8/13(61.5)    | 0.31(0.09-1.14)  | 0.08 | 0.22(0.04-1.24) | 0.09  |
| 12 | Freelancers                | 23/34(67.6)   | 0.41(0.16-1.08)  | 0.07 | 0.18(0.05-0.62) | 0.007 |
| 13 | Unemployed                 | 34/45(75.6)   | 0.61(0.24-1.55)  | 0.30 | 0.58(0.21-1.61) | 0.29  |
| 14 | Retiree                    | 53/72(73.6)   | 0.55(0.24-1.26)  | 0.16 | 0.36(0.12-1.08) | 0.07  |
| 15 | Place of residence         |               |                  |      |                 |       |
| 16 |                            |               |                  |      |                 |       |
| 17 | Urban                      | 117/147(79.6) | 1                |      |                 |       |
| 18 | Town                       | 37/53(69.8)   | 0.59(0.29-1.21)  | 0.15 |                 |       |
| 19 | Village                    | 81/110(73.6)  | 0.72(0.40-1.28)  | 0.26 |                 |       |
| 20 | Income (RMB/year)          |               |                  |      |                 |       |
| 21 |                            |               |                  |      |                 |       |
| 22 | <50,000                    | 153/206(74.3) | 1                |      |                 |       |
| 23 | 50,000~100,000             | 61/80(76.3)   | 1.19(0.65-2.20)  | 0.57 |                 |       |
| 24 | 100,000~200,000            | 16/18(88.9)   | 1.73(0.48-6.22)  | 0.40 |                 |       |
| 25 | >200,000                   | 5/6(83.3)     | 1.73(0.20-15.16) | 0.62 |                 |       |
| 26 | Number of hospitalizations |               |                  |      |                 |       |
| 27 |                            |               |                  |      |                 |       |
| 28 | 1                          | 87/117(74.4)  | 1                |      |                 |       |
| 29 | 2                          | 59/74(79.7)   | 1.36(0.67-2.74)  | 0.40 |                 |       |
| 30 | ≥3                         | 89/119(74.8)  | 1.02(0.57-1.84)  | 0.94 |                 |       |
| 31 | Ward                       |               |                  |      |                 |       |
| 32 |                            |               |                  |      |                 |       |
| 33 | Medical ward               | 86/110(78.2)  | 1                |      | 1               |       |
| 34 | Surgical ward              | 117/144(81.3) | 1.21(0.65-2.24)  | 0.55 | 1.27(0.58-2.80) | 0.55  |
| 35 | Obstetrics/gynecology ward | 14/23(60.9)   | 0.43(0.17-1.13)  | 0.09 | 0.18(0.04-0.80) | 0.02  |
| 36 | Pediatric ward             | 6/9(66.7)     | 0.56(0.13-3.40)  | 0.43 | 0.95(0.12-7.39) | 0.96  |
| 37 | Infectious diseases ward   | 10/15(66.7)   | 0.56(0.17-1.79)  | 0.33 | 0.51(0.13-2.04) | 0.34  |
| 38 |                            |               |                  |      |                 |       |
| 39 |                            |               |                  |      |                 |       |
| 40 |                            |               |                  |      |                 |       |
| 41 |                            |               |                  |      |                 |       |
| 42 |                            |               |                  |      |                 |       |
| 43 |                            |               |                  |      |                 |       |
| 44 |                            |               |                  |      |                 |       |
| 45 |                            |               |                  |      |                 |       |
| 46 |                            |               |                  |      |                 |       |
| 47 |                            |               |                  |      |                 |       |

|                                  |               |                 |       |                 |       |
|----------------------------------|---------------|-----------------|-------|-----------------|-------|
| ICU§                             | 2/9(22.2)     | 0.08(0.02-0.41) | 0.002 | 0.06(0.01-0.45) | 0.006 |
| Was surgery performed this time? |               |                 |       |                 |       |
| No                               | 135/178(75.8) | 1               |       |                 |       |
| Yes                              | 100/132(75.8) | 0.99(0.59-1.68) | 0.99  |                 |       |
| Is there any infection?          |               |                 |       |                 |       |
| No                               | 171/224(76.3) | 1               |       |                 |       |
| Yes                              | 64/86(74.4)   | 0.90(0.51-1.60) | 0.72  |                 |       |

† OR, odds ratio; ‡ CI, confidence interval; § ICU, intensive care unit.

1  
2  
3  
4  
5 **Figure legends**  
6

7 **Supplemental figure 1. Seven-steps to handwashing**  
8

- 9 1. Rub palms together  
10 2. Rub the back of both hands  
11 3. Interlace fingers and rub hands together  
12 4. Interlock fingers and rub the back of fingers of both hands  
13 5. Rub thumb in a rotating manner followed by the area between index finger and  
14 thumb for both hands  
15 6. Rub fingers on palm for both hands  
16 7. Rub both wrists in a rotating manner  
17  
18  
19  
20  
21  
22  
23  
24  
25  
26  
27  
28  
29  
30  
31  
32  
33  
34  
35  
36  
37  
38  
39  
40  
41  
42  
43  
44  
45  
46  
47  
48  
49  
50  
51  
52  
53  
54  
55  
56  
57  
58  
59  
60

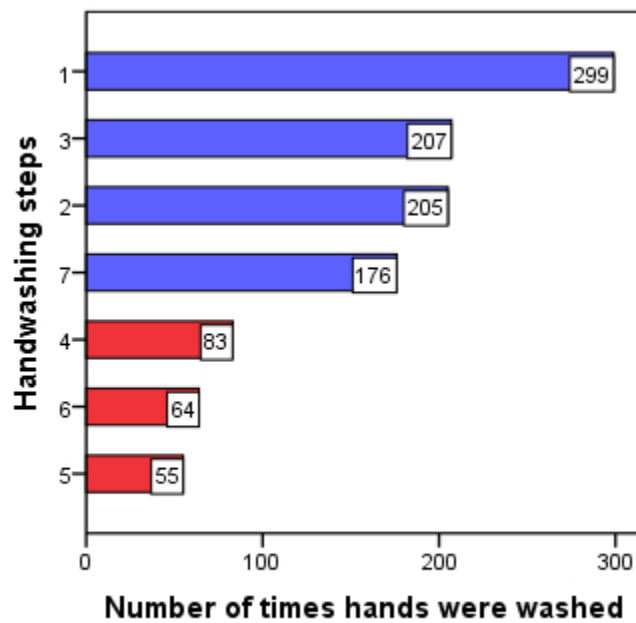

28x28mm (300 x 300 DPI)

1  
2 **Supplementary File 1**  
3  
4  
5

6 STROBE Statement—Checklist of items that should be included in reports of *cross-sectional studies*  
7  
8  
9

|                              | Item No | Recommendation                                                                                                                                                                       | Page No |
|------------------------------|---------|--------------------------------------------------------------------------------------------------------------------------------------------------------------------------------------|---------|
| <b>Title and abstract</b>    | 1       | (a) Indicate the study's design with a commonly used term in the title or the abstract                                                                                               | 1       |
|                              |         | (b) Provide in the abstract an informative and balanced summary of what was done and what was found                                                                                  | 1-2     |
| <b>Introduction</b>          |         |                                                                                                                                                                                      |         |
| Background/rationale         | 2       | Explain the scientific background and rationale for the investigation being reported                                                                                                 | 3       |
| Objectives                   | 3       | State specific objectives, including any prespecified hypotheses                                                                                                                     | 3-4     |
| <b>Methods</b>               |         |                                                                                                                                                                                      |         |
| Study design                 | 4       | Present key elements of study design early in the paper                                                                                                                              | 4       |
| Setting                      | 5       | Describe the setting, locations, and relevant dates, including periods of recruitment, exposure, follow-up, and data collection                                                      | 4       |
| Participants                 | 6       | (a) Give the eligibility criteria, and the sources and methods of selection of participants                                                                                          | 4       |
| Variables                    | 7       | Clearly define all outcomes, exposures, predictors, potential confounders, and effect modifiers. Give diagnostic criteria, if applicable                                             | 6       |
| Data sources/<br>measurement | 8*      | For each variable of interest, give sources of data and details of methods of assessment (measurement). Describe comparability of assessment methods if there is more than one group | 6-7     |
| Bias                         | 9       | Describe any efforts to address potential sources of bias                                                                                                                            | 5,6,7   |
| Study size                   | 10      | Explain how the study size was arrived at                                                                                                                                            | 5       |
| Quantitative variables       | 11      | Explain how quantitative variables were handled in the analyses. If applicable, describe which groupings were chosen and why                                                         | 5       |
| Statistical methods          | 12      | (a) Describe all statistical methods, including those used to control for confounding                                                                                                | 7       |
|                              |         | (b) Describe any methods used to examine subgroups and interactions                                                                                                                  | 8       |
|                              |         | (c) Explain how missing data were addressed                                                                                                                                          | 8       |

|                          |     |                                                                                                                                                                                                              |            |
|--------------------------|-----|--------------------------------------------------------------------------------------------------------------------------------------------------------------------------------------------------------------|------------|
|                          |     | (d) If applicable, describe analytical methods taking account of sampling strategy                                                                                                                           | 8          |
|                          |     | (e) Describe any sensitivity analyses                                                                                                                                                                        | 8          |
| <b>Results</b>           |     |                                                                                                                                                                                                              |            |
| Participants             | 13* | (a) Report numbers of individuals at each stage of study—eg numbers potentially eligible, examined for eligibility, confirmed eligible, included in the study, completing follow-up, and analysed            | 8          |
|                          |     | (b) Give reasons for non-participation at each stage                                                                                                                                                         | 8          |
|                          |     | (c) Consider use of a flow diagram                                                                                                                                                                           | 8          |
| Descriptive data         | 14* | (a) Give characteristics of study participants (eg demographic, clinical, social) and information on exposures and potential confounders                                                                     | 8          |
|                          |     | (b) Indicate number of participants with missing data for each variable of interest                                                                                                                          | 8          |
| Outcome data             | 15* | Report numbers of outcome events or summary measures                                                                                                                                                         | 8          |
| Main results             | 16  | (a) Give unadjusted estimates and, if applicable, confounder-adjusted estimates and their precision (eg, 95% confidence interval). Make clear which confounders were adjusted for and why they were included | 9,10, 11   |
|                          |     | (b) Report category boundaries when continuous variables were categorized                                                                                                                                    | 9,10       |
|                          |     | (c) If relevant, consider translating estimates of relative risk into absolute risk for a meaningful time period                                                                                             | 11         |
| Other analyses           | 17  | Report other analyses done—eg analyses of subgroups and interactions, and sensitivity analyses                                                                                                               | 11         |
| <b>Discussion</b>        |     |                                                                                                                                                                                                              |            |
| Key results              | 18  | Summarise key results with reference to study objectives                                                                                                                                                     | 11         |
| Limitations              | 19  | Discuss limitations of the study, taking into account sources of potential bias or imprecision. Discuss both direction and magnitude of any potential bias                                                   | 15         |
| Interpretation           | 20  | Give a cautious overall interpretation of results considering objectives, limitations, multiplicity of analyses, results from similar studies, and other relevant evidence                                   | 12, 13, 14 |
| Generalisability         | 21  | Discuss the generalisability (external validity) of the study results                                                                                                                                        | 16         |
| <b>Other information</b> |     |                                                                                                                                                                                                              |            |
| Funding                  | 22  | Give the source of funding and the role of the funders for the present study                                                                                                                                 | Title      |

1  
2  
3  
4  
5  
6  
7  
8  
9  
10  
11  
12  
13  
14  
15  
16  
17  
18  
19  
20  
21  
22  
23  
24  
25  
26  
27  
28  
29  
30  
31  
32  
33  
34  
35  
36  
37  
38  
39  
40  
41  
42  
43  
44  
45  
46  
47  
48  
49  
50  
51  
52  
53  
54  
55  
56  
57  
58  
59  
60

|                                                                                  |      |
|----------------------------------------------------------------------------------|------|
| and, if applicable, for the original study on which the present article is based | page |
|----------------------------------------------------------------------------------|------|

For peer review only

# BMJ Open

## Knowledge and Practice of Hand Hygiene Among Hospitalized Patients in a Tertiary General Hospital in China and Their Attitudes: A Cross-Sectional Survey

|                                 |                                                                                                                                                                                                                                                                                                                                        |
|---------------------------------|----------------------------------------------------------------------------------------------------------------------------------------------------------------------------------------------------------------------------------------------------------------------------------------------------------------------------------------|
| Journal:                        | <i>BMJ Open</i>                                                                                                                                                                                                                                                                                                                        |
| Manuscript ID                   | bmjopen-2018-027736.R1                                                                                                                                                                                                                                                                                                                 |
| Article Type:                   | Research                                                                                                                                                                                                                                                                                                                               |
| Date Submitted by the Author:   | 12-Jan-2019                                                                                                                                                                                                                                                                                                                            |
| Complete List of Authors:       | LI, Yunxia; Xiangya Hospital Central South University, LIU, Yaohong; Xiangya Hospital Central South University, ZENG, Li; Xiangya Hospital Central South University, CHEN, Chong; Xiangya Hospital Central South University, MO, Dan; Xiangya Hospital Central South University, YUAN, Sue; Xiangya Hospital Central South University, |
| <b>Primary Subject Heading</b>: | Public health                                                                                                                                                                                                                                                                                                                          |
| Secondary Subject Heading:      | Health services research, Infectious diseases, Medical education and training, Public health                                                                                                                                                                                                                                           |
| Keywords:                       | Infection control < INFECTIOUS DISEASES, Public health < INFECTIOUS DISEASES, Epidemiology < INFECTIOUS DISEASES                                                                                                                                                                                                                       |
|                                 |                                                                                                                                                                                                                                                                                                                                        |

SCHOLARONE™  
Manuscripts



1  
2  
3  
4  
5 **Knowledge and Practice of Hand Hygiene Among Hospitalized Patients in a**  
6 **Tertiary General Hospital in China and Their Attitudes: A Cross-Sectional**  
7 **Survey**  
8  
9  
10  
11  
12

13 LI Yunxia<sup>1,2</sup>, LIU Yaohong<sup>3</sup>, ZENG Li<sup>4</sup>, CHEN Chong<sup>5</sup>, MO Dan<sup>1</sup>, YUAN Sue<sup>1,2\*</sup>  
14  
15

16 <sup>1</sup> Infectious Diseases Department, Xiangya Hospital of Central South University, Changsha,  
17  
18 China  
19  
20

21 <sup>2</sup> Xiangya Nursing School, Central South University, Changsha, China  
22

23 <sup>3</sup> Colorectal and Anal Surgical Department, Xiangya Hospital of Central South  
24  
25 University, Changsha, China  
26  
27

28 <sup>4</sup> Burns Department, Xiangya Hospital of Central South University, Changsha, China  
29  
30

31 <sup>5</sup> Cardiology Department, Xiangya Hospital of Central South University, Changsha,  
32  
33 China  
34  
35

36 **\*Correspondence to** YUAN Sue, PhD, RN, Infectious Diseases Department, Xiangya Hospital  
37  
38 of Central South University, 87 Xiangya Rd, Changsha, Hunan 410008, P.R. China.  
39  
40

41 **Tel:** +86 13873158943; **E-mail address:** 248143918@qq.com  
42  
43  
44  
45  
46  
47  
48  
49  
50  
51  
52  
53  
54  
55  
56  
57  
58  
59  
60

## Abstract

**Objectives:** We aimed to gain a better understanding of patients' practice of hand hygiene and their knowledge and attitudes.

**Design:** A Cross-Sectional Survey.

**Setting:** A 3500-bed university-affiliated medical hospital in China.

**Participants:** Inpatients and their family members or caregivers.

**Methods:** An anonymous, self-reported questionnaire were used to collect data.

**Results:** A total of 376 questionnaires were issued, and 310 respondents completed it. Of the 310 respondents, 47.4% had received hand hygiene education, and 13.5% had a completing understanding of hand hygiene. A majority of patients believed that handwashing was important for disease recovery, and that it could prevent infection development. A total of 62.3% of patients washed their hands less than 5 times a day and 49.0% spent less than 1 minute every time. With regards to the seven steps of handwashing, 96.45% of the respondents adhered to the first step (washing the palms), but only 20.6% adhered to the fifth step (thumbs) and 17.7% to the sixth step (fingertips). Most respondents washed their hands only when visibly dirty. Few patients washed their hands before drinking fluids, and before and after interacting with visitors. Hand hygiene compliance was lower among ICU patients than medical patients.

**Conclusions:** In conclusion, this study demonstrated that patients had a positive attitude towards hand hygiene. However, their levels of knowledge and practice were unsatisfactory. A

1  
2  
3  
4  
5  
6  
7  
8  
9  
10  
11  
12  
13  
14  
15  
16  
17  
18  
19  
20  
21  
22  
23  
24  
25  
26  
27  
28  
29  
30  
31  
32  
33  
34  
35  
36  
37  
38  
39  
40  
41  
42  
43  
44  
45  
46  
47  
48  
49  
50  
51  
52  
53  
54  
55  
56  
57  
58  
59  
60

systematical education about patient hand hygiene is needed in future to correct this knowledge and behavior.

**Keywords:** Patient hand hygiene, Inpatient, Health care-associated infection, China

### Strengths and limitations of this study

- We measured the hand hygiene knowledge, attitude, and performance from the prospects of patient view.
- We designed the questionnaire combines both WHO and CDC patient hand hygiene related policies.
- A stratified random sampling method was used in order to make the sample representative.
- This is a single-center cross-sectional survey, our results may not be applicable to all other institutions.
- There is a need for further observational studies including quantitative hand bacterial cultures to verify the results of this study.

## INTRODUCTION

Health care-associated infections (HCAIs) are major risk factors for the development of sepsis,<sup>1</sup> which affects more than 30 million patients every year worldwide, leading to 6 million potential deaths.<sup>2</sup> Both the Centers for Disease Control and Prevention (CDC) and World Health Organization (WHO) consider hand hygiene (HH) to be the most important factor in the prevention of HCAIs and the spread of pathogens.<sup>3,4</sup> The practice of effective HH plays a key role in the prevention of healthcare-associated sepsis.<sup>5</sup> Great efforts have been made to improve the performance of “My 5 moments for hand hygiene” among healthcare workers (HCWs), and this has had a global improvement. However, the role of patient hand hygiene (PHH) has been underestimated. Emerging evidence suggests that most infections occur as a result of bacteria present within a patient’s own flora as well as bacteria present on surfaces within the healthcare environment;<sup>6-8</sup> improving the hand hygiene of patients has important clinical significance in reducing nosocomial infection, improving the quality of life of patients and reducing the rate of hospitalization and mortality.<sup>9</sup> The CDC has therefore proposed nine moments for patients to practice hand hygiene in clinical institutions.<sup>10</sup> However, PHH has been neglected in most medical institutions in China, there were no information provided for patient when they admitted. And also there were few studies have investigated PHH in China, with some of them only focusing on the role of patients as monitors or auditors in the improvement of HCW HH compliance.<sup>11</sup> Thus, the purpose of this cross-sectional study was to investigate inpatient

1  
2  
3  
4  
5 knowledge, as well as the attitudes towards and practice of PHH during hospital stay with  
6  
7  
8 non-provision of PHH information. We also aim to characterize and identify some factors  
9  
10 influencing practice compliance, which may contribute to the design of effective patient hand  
11  
12 hygiene promotion strategies.  
13  
14

## 15 **METHODS**

16  
17  
18 This cross-sectional, single-center study was performed at a 3500-bed university-affiliated  
19  
20 medical hospital between November 2017 and December 2017. The study was approved by the  
21  
22 hospital's institutional review board (No. 201708955).  
23  
24

25  
26 In this study, PHH was defined as HH practices performed by a patient on his or her own  
27  
28 hands, including handwashing, and the use of alcohol-based hand rubs (ABHRs) and disinfecting  
29  
30 wipes.<sup>9</sup> In certain situations, this care may have to be provided to patients by professional  
31  
32 caregivers or family members.  
33  
34  
35

## 36 **Participants**

37  
38  
39 The study was conducted in 71 clinical wards, including the departments of internal  
40  
41 medicine, surgery, obstetrics and gynecology, pediatrics and infectious diseases, and intensive  
42  
43 care units (ICUs). Outpatient wards, operating rooms, psychiatric wards, isolation wards, and  
44  
45 emergency rooms were excluded.  
46  
47  
48

49  
50 Patients were enrolled through a random sampling method using a random number table.  
51  
52 Firstly, data on the number of beds in each ward were obtained from the hospital management  
53  
54  
55  
56  
57  
58  
59  
60

1  
2  
3  
4  
5 department, and a total of 3,000 of these beds met our inclusion criteria in terms of ward type.  
6

7  
8 Secondly, according to the largest sample size formula of simple random sampling, with values  
9  
10 of  $\Pi=0.5$ ,  $\alpha=0.05$ , and  $\delta=0.05$ , a total sample size of 385 was obtained. After correction, the  
11  
12 required sample size was 342, but taking into consideration a no-response rate of 10%, a total of  
13  
14 376 patients were required. Finally, patients from each ward were randomly selected using an 8:1  
15  
16 proportion.  
17  
18  
19

20  
21 Hospitalized patients who provided verbal informed consent and agreed to voluntarily  
22  
23 participate in this study were included. Exclusion criteria were: patients with an admission time  
24  
25 less than 24 hours, patients who did not return to their bed due to surgery or transfer to the ICU,  
26  
27 and those with mental status changes. Family members or caregivers were enrolled to provide  
28  
29 patients' demographic information, attitude and the HH care they have provided to patients in the  
30  
31 case of patients with impaired consciousness, who were critically ill, or who were under the age  
32  
33 of 14 years. Only family members who stayed with the patients in the wards for more than 1 day  
34  
35 were enrolled. Visitors, friends, and family members who had only short visits with the patients  
36  
37 were excluded. The nurses who were in charge of the eligible patients were selected.  
38  
39  
40  
41  
42  
43

#### 44 **Questionnaires**

45  
46  
47 In this study, the survey instrument was a self-designed structured questionnaire that was  
48  
49 based on "When should you wash your hands" released by the CDC in 2016,<sup>10</sup> and the "Standard  
50  
51 for hand hygiene for health care workers in health care settings" issued by the National Health  
52  
53  
54  
55  
56  
57  
58  
59  
60

1  
2  
3  
4  
5 Commission of the People's Republic of China in 2009.<sup>12</sup> Experts from the Department of  
6  
7  
8 Infectious Diseases were also consulted in this regard. The questionnaire comprised two parts.  
9  
10 The first part was designed to allow for the primary nurse to assess the elicited patient disease  
11  
12 information, such as diagnosis, whether surgery was performed, or if there was any infection  
13  
14 during the hospital stay.  
15  
16

17  
18 The second part pertaining to PHH was designed for patients and their families or  
19  
20 caregivers, and comprises 4 sections. Section 1 pertained to patients' demographic data,  
21  
22 including ward type, bed number, place of residence, income, and number of hospitalizations.  
23  
24 Section 2 pertained to caregiver information, such as if the respondent is a family member or  
25  
26 caregiver, his/her relationship with the patient, length of hospital stay, education, and occupation.  
27  
28 Section 3 addressed PHH knowledge and attitudes, while Section 4 evaluated patients' practice  
29  
30 of HH, including handwashing moments, steps, number of wash times daily, minutes taken every  
31  
32 time, and ways in which hands were dried. The PHH moments were scaled as 'seldom',  
33  
34 'sometimes', 'often', and 'always'. 'Not applicable' was selected for those who reported that  
35  
36 they did not perform the procedure and therefore did not encounter that moment.  
37  
38  
39  
40  
41  
42  
43

#### 44 **Implementation**

45  
46 The survey was conducted by eight research assistants, all of whom were team members  
47  
48 who participated in all study meetings and discussions, who had knowledge on HH and its  
49  
50 association with HCAI, and who had received unified training on how to fill out the  
51  
52  
53  
54  
55  
56  
57  
58  
59  
60

1  
2  
3  
4  
5 questionnaire. The research assistants first obtained approval from the head nurses in the study  
6  
7  
8 wards, and then obtained informed consent from the participants who were selected according to  
9  
10 our design. Participants were informed that the questionnaire content would not involve invasive  
11  
12 measurements or invade privacy, and would not cause injury to the body or mind. All eligible  
13  
14 patients and their families/caregivers were informed that participation in the study was  
15  
16 voluntarily, and that refusal to participate or withdrawal from the study at any point for any  
17  
18 reason would not influence medical decisions. The participants were assured that their  
19  
20 information would only be used for research and that strict confidentiality would be maintained,  
21  
22 as well as that their data would not be used for business or other purposes without their  
23  
24 permission. The questionnaires were distributed to patients who were agreed to voluntary  
25  
26 participation in research, and were completed by respondents themselves under the instructions  
27  
28 of researchers. The questionnaires were distributed and collected on the spot through SO JUMP  
29  
30 (a professional online questionnaire platform). A small gift (a piece of soap) valued at  
31  
32 approximately \$0.50 was given to each respondent who completed the questionnaire.  
33  
34  
35  
36  
37  
38  
39  
40

### 41 **Patient and public involvement**

42  
43  
44 The current study did not include patient and public involvement.  
45  
46

### 47 **Statistical analysis**

48  
49 Questionnaire data are presented as the number of participants and percentages. A  
50  
51 Kruskal-Wallis H test was applied to analyze the PHH implementation rate in the different  
52  
53  
54  
55  
56  
57  
58  
59  
60



1  
2  
3  
4  
5 departments. Binary logistic regression analysis was used to identify the demographic predictors  
6  
7  
8 for the respondents who had performed HH in the moment “after using the toilet, bedpan, or  
9  
10 commode”. Only those who responded “always” were included in the analysis. Univariate  
11  
12 analysis by non-conditional logistic regression was used to compare each demographic variable  
13  
14 in the different groups. Variables with a *P* value <.10 were further tested in the multivariate  
15  
16 logistic regression analysis by the enter method. A 2-tailed *P* value of 0.05 was considered  
17  
18 statistically significant.  
19  
20  
21  
22

## 23 RESULTS

### 24 Population characteristics

25  
26 A total of 376 questionnaires were issued, and 310 respondents, including 242 patients  
27  
28 (78.1%) and 68 family members/ caregivers (21.9%), completed the questionnaire. The total  
29  
30 response rate was 82.4% (310 of 376). The Cronbach’s alpha of the questionnaire is 0.867,  
31  
32 which indicate a good reliability of this self-designed questionnaire. The respondents’  
33  
34 characteristics are summarized in Table 1. A total of 46.8% of the participants were women, and  
35  
36 most of them (86.8%) were married. The majority (79.7%) had a high school education or lower.  
37  
38 More than half of the participants (64.5%) were urban or town dwellers, and a similar proportion  
39  
40 (66.5%) had an annual income <50,000 RMB (~US\$7,987). Most respondents (62.3%) had been  
41  
42 hospitalized previously, and 27.7% reported having an infection at present.  
43  
44  
45  
46  
47  
48  
49  
50

### 51 Patients’ performance of hand hygiene and their knowledge and attitudes

1  
2  
3  
4  
5 Most of the participants (72.2%) reported that they did not know about HH knowledge or  
6 knew very little about it. Less than half (47.4%) of the respondents had received HH education  
7 before; of them, HCWs (95, 35.6%) and television (76, 28.5%) were the main resources. A  
8 majority (94.2%) of the participants believed that handwashing was important for disease  
9 recovery, and almost the same percentage (93.2%) of them believed that handwashing could  
10 prevent infection spread among patients.  
11  
12  
13  
14  
15  
16  
17  
18  
19  
20

21 More than half (62.2%) of the patients washed their hands less than 5 times a day, and  
22 approximately half (49.0%) of them spent less than 1 minute washing their hands every time.  
23 Washing hands under flowing water (64.7%) was the main route of washing, compared to  
24 washing in a basin or using ABHRs; however, only 13.4% and 25.6% of the patients used hand  
25 sanitizers and soap, respectively. A total of 41.9% of the respondents reported that they had a  
26 dedicated hand towel, but only 20.0% and 21.6%, respectively, chose a dedicated hand towel or  
27 tissue to wipe their hands (Table 2).  
28  
29  
30  
31  
32  
33  
34  
35  
36  
37  
38

### 39 **Patients' practice of the '7 steps to handwashing'**

40  
41 The results of patients' practice of the '7 steps to handwashing' are displayed in  
42 Supplemental figure 1. Most respondents washed their hands with adherence to the first step (rub  
43 palms together: 96.45%, 299 of 310). More than half of them practiced the second step (rub the  
44 back of both hands: 66.13%, 205 of 310) and third step (interlace fingers and rub hands together:  
45 66.77%, 207 of 310). A slightly lower number of participants (56.77%, 176 of 310) adhered to  
46  
47  
48  
49  
50  
51  
52  
53  
54  
55  
56  
57  
58  
59  
60

1  
2  
3  
4  
5 the seventh step (rub both wrists in a rotating manner). The implementation rates of the fourth  
6  
7  
8 step (interlock fingers and rub the back of fingers of both hands: 26.77%, 83 of 310), and sixth  
9  
10  
11 step (rub fingers on palm for both hands: 20.65%, 64 of 310) were lower. However, the fifth step  
12  
13 (rub thumb in a rotating manner followed by the area between index finger and thumb for both  
14  
15  
16 hands) had the worst execution rate (17.74%, 55 of 310).

### 17 18 **Patient hand hygiene moments**

19  
20  
21 Three-quarters (75.8%; 235 of 310) of the respondents washed their hands after using the  
22  
23  
24 toilet/bedpan/commode, and 86.1% washed their hands when they were visibly dirty (Table 3).  
25  
26  
27 Approximately half (47.7%) of the patients washed their hands before touching any breaks in the  
28  
29  
30 skin, whereas the implementation rates before any care procedures (19.0%, 59 of 310) and  
31  
32  
33 dialysis/contact with IV lines or other tubes (19.7%, 61 of 310) were low. The performance of  
34  
35  
36 handwashing before drinking fluids (11.0%, 34 of 310), as well as before and after interacting  
37  
38  
39 with visitors (11.9%, 37 of 310 vs 13.2%, 41 of 310) was also very low.

### 40 41 **Patient hand hygiene moments in different departments**

42  
43  
44 Participants in the Department of Internal Medicine had a relatively high execution rate of  
45  
46  
47 HH when their hands were visibly dirty (96.4%, 106 of 110), before eating (82.7%, 91 of 110),  
48  
49  
50 and before touching any breaks in the skin (71.8%, 79 of 110). Those in the Department of  
51  
52  
53 Surgery tended to wash their hands after using the toilet/bedpan/commode (94.4%, 136 of 144)  
54  
55  
56 and after coughing, sneezing, or touching the nose or mouth (50.7%, 73 of 144). Those in the  
57  
58  
59  
60

1  
2  
3  
4  
5 Department of Infectious Diseases had good performance rates of handwashing before  
6  
7  
8 interacting with visitors (40.0%, 6 of 15) (Table 4). There were significant differences in this  
9  
10  
11 regard between the different departments in the Kruskal-Wallis H test ( $H=19.838$ ,  $P=0.001$ ).

### 12 13 **Significant predictors of PHH moments**

14  
15  
16 A majority of the respondents (75.8%, 235 of 310) “Always” performed HH after using the  
17  
18 toilet/ bedpan/commode (Table 5), and the univariate analysis identified one significant predictor:  
19  
20  
21 very few ICU patients practiced HH compared to medical patients (odds ratio [OR]= 0.08, 95%  
22  
23 confidence interval [CI]: 0.02-0.41,  $P = 0.002$ ). In the multivariate analysis, we found two  
24  
25  
26 significant variables: being a farmer rather than a clerk (adjusted OR= 0.18, 95% CI: 0.05-0.61,  
27  
28  $P =0.004$ ) and being a freelancer (adjusted OR=0.18, 95% CI: (0.05-0.62,  $P =0.007$ ). Medical  
29  
30  
31 patients had a higher HH performance rate than those in the Department of  
32  
33  
34 Obstetrics-Gynecology (adjusted OR= 0.18, 95% CI: 0.04-0.80,  $P =0.02$ ) and ICU (adjusted  
35  
36  
37 OR= 0.06, 95% CI: 0.01-0.45,  $P =0.006$ ).

### 38 39 **DISCUSSION**

40  
41  
42 In the present study, we examined hospitalized patients’ knowledge of, attitudes towards,  
43  
44  
45 and practice of HH. Our findings demonstrate that although patients had a positive attitude  
46  
47  
48 towards HH, their knowledge was insufficient, consisting with Cheng VC et al’s research<sup>13</sup>.  
49  
50  
51 The social desirability factor might be operating, the hospital we involved attaches great  
52  
53  
54 importance to HCW HH and has implemented the WHO’s multimodal HH improvement  
55  
56  
57  
58  
59  
60

1  
2  
3  
4  
5 strategies;<sup>14</sup> therefore, the participants were in an atmosphere in which the importance of HH is  
6 highlighted daily, leading them to believe in its importance. However, due to non-provision of  
7 any PHH information in daily life, nor in hospital after admitted, they were unaware of when and  
8 how to wash their hands in clinical practice.  
9  
10  
11  
12  
13  
14

15 Patients' performance of HH is poor, and the existing facilities and products are routinely  
16 underutilized, consistent with the findings of previous studies.<sup>15</sup> Although the WHO's  
17 multimodal HH improvement strategies have been implemented by our hospital's Infection  
18 Control Committee with the provision of sinks and wash basins for the performance of  
19 soap-and-water cleaning in every patient's room, and the provision of ABHR for waterless hand  
20 cleaning in the rooms and corridors for all HCWs and patients,<sup>14</sup> the frequency and duration of  
21 handwashing were not satisfactory in this study. A systematical education about PHH seems  
22 necessary, not only for medical staff, but also for patients themselves. It is of great significance  
23 for patients to realize their own behavior for the prevention and control of nosocomial infection  
24 and the promotion of their own safety. Staff should receive education on the importance of PHH  
25 in the prevention of hospital-acquired infection; and staff need to be instructed to provide verbal  
26 PHH education to all newly admitted patients, and to provide reminders, assistance, and  
27 encouragement for PHH practice.<sup>16-17</sup> In addition, it is also important to ensure that HH  
28 products—such as alcohol-based hand wipes or ABHR—are accessible to patients who are  
29  
30  
31  
32  
33  
34  
35  
36  
37  
38  
39  
40  
41  
42  
43  
44  
45  
46  
47  
48  
49  
50  
51  
52  
53  
54  
55  
56  
57  
58  
59  
60

1  
2  
3  
4  
5 bedridden and are unable to get to the sink.<sup>18,19</sup> Staff or family members should be instructed to  
6  
7  
8 provide assistance to improve PHH opportunities.<sup>18</sup>  
9

10 Hands were washed most frequently when they were visibly dirty and after using the toilet,  
11  
12 but less frequently before drinking fluids and taking medicine, which would be the optimal time  
13  
14 for the prevention of fecal-oral transmission. In this study, 75.8% of the participants washed their  
15  
16 hands after using the toilet/bedpan/commode, but only 11.0% of them washed their hands before  
17  
18 drinking fluids. Similar results have been observed in other study on patients in transplant  
19  
20 units.<sup>20</sup> Hospital environments are often contaminated with hospital-acquired pathogens,<sup>16-18</sup>  
21  
22 therefore, there is a need for education campaigns aimed at patient-initiated HH and HH that is  
23  
24 directly observed before meals and the intake of medications during hospitalization.<sup>21,22</sup>  
25  
26  
27  
28  
29  
30

31 Our results also revealed that only 11.9% of the patients washed their hands before  
32  
33 interacting with visitors and 13.2% washed their hands after the visitors left. Visitors may be  
34  
35 vectors of pathogenic organisms that are potentially dangerous, particularly to  
36  
37 immunocompromised patients.<sup>23</sup> If visitors carry certain pathogenic organisms on their hands  
38  
39 and do not perform HH upon entry to the hospital, vulnerable patient populations may be at an  
40  
41 increased risk for infection if they do not wash their hands after the visitors leave.<sup>24</sup> Thus, to win  
42  
43 the battle against HCAs, there is a need for coordinated effort to enforce HH that includes  
44  
45 patients, as well as their families, and visitors.<sup>25</sup> In addition to providing better signage and  
46  
47 education among care providers<sup>26,27</sup>, other hospital approaches, such as the installation of more  
48  
49  
50  
51  
52  
53  
54  
55  
56  
57  
58  
59  
60

1  
2  
3  
4  
5 strict visiting infrastructure (i.e., ICU doors that will not open if ABHR is not used) might be  
6  
7  
8 considered.<sup>23</sup>  
9

10 This study resulted in some significant findings. patients' performance about PHH are  
11 differences in different departments. Patients in 'Medical department' showed significantly  
12  
13 higher PHH performance compared with those in 'Department of Obstetrics/ Gynecology'.  
14  
15 Patients activity and severity of illness may be working, patients in 'medical department' are  
16  
17 mostly treated conservatively, their activity are less restricted than those in 'Department of  
18  
19 Obstetrics/ Gynecology', who may need absolute bed rest because of gynecological surgery or  
20  
21 give birth to a child just now; In addition, chinese traditional concept may be another factor,  
22  
23 which holds that women should not be exposed to cold water after surgery or after childbirth,  
24  
25 which may also reduce the practice of hand washing.  
26  
27  
28  
29  
30  
31  
32  
33

34 The most significant findings being that ICU patients rarely practice HH compared to those  
35  
36 in other departments. This is not surprising as patients in the ICU are generally critically ill or  
37  
38 unconsciousness, they cannot wash their hands by themselves. Even the assistance of  
39  
40 professional caregivers does not seem to work. This suggests the importance of the role of  
41  
42 caregivers in ensuring adequate HH in such functionally dependent patients. To the best of our  
43  
44 knowledge, this study is the first to provide data on ICU PHH, since most previous studies on  
45  
46 ICU HH focused on HCWs or patients' families.<sup>23,28</sup> Considering that multidrug-resistant  
47  
48 acinetobacter baumannii infection are highly in ICU <sup>29</sup> and ICU patients are the most susceptible  
49  
50  
51  
52  
53  
54  
55  
56  
57  
58  
59  
60

1  
2  
3  
4  
5 populations to nosocomial infections,<sup>30</sup> attention must be given to improving their adherence to  
6  
7  
8 HH rules to reduce hospital infections.  
9

10 Our study also identified occupation such as ‘farmer’ showed good PHH performance  
11  
12 compared with ‘clerk’ or ‘freelancer’. We did not find the similar findings in other studies, the  
13  
14 reasons for which may be need to be further explored.  
15  
16

17  
18 Our study has several limitations. First, since this is a single-center cross-sectional survey,  
19  
20 our results may not be applicable to all other institutions. Thus, it is recommended that a  
21  
22 multi-center study with a large sample size be conducted in the future. Second, our inclusion of  
23  
24 certain patients and wards may have resulted in selection bias. Physically weak patients were  
25  
26 also recruited in the present study, and their families or caregivers filled out the questionnaire;  
27  
28 therefore, there is a possibility that the family members of caregivers may have provided  
29  
30 information on their own HH situation rather than that of the patients. Therefore, there is a need  
31  
32 for further observational studies including quantitative hand bacterial cultures to verify the  
33  
34 results of this study. Nonetheless, we believe that this study included a representative sample of  
35  
36 inpatients. Third, the study was conducted using a convenience sampling method in the category  
37  
38 of family members. Finally, although the survey findings are interesting, the patients appear to  
39  
40 know that HH is important even though they know little about HH knowledge, the social  
41  
42 desirability factor might be operating, the results are not an indicator of how patients may  
43  
44 actually behave in real life.  
45  
46  
47  
48  
49  
50  
51  
52  
53  
54  
55  
56  
57  
58  
59  
60



## CONCLUSIONS

In conclusion, this study demonstrated that patients had a positive attitude towards HH. However, their levels of knowledge and practice were unsatisfactory. These results suggest that A systematical education about PHH is needed in future to correct this knowledge and behavior. In addition, special attention should be given to those HH moments the compliance rates to which were the lowest, such as before drinking fluids, as well as before interacting with visitors and after they leave.

## Acknowledgments

The authors thank Li Hao RN, Luo Zi-zhao RN, Zhong Xu RN, Luo Yan RN and Hu Chun-Ping RN for their assistance with data collection, as well as the ward nurse leaders, nursing staff, and patients of the hospital for their willingness to participate. We also would like to thank Editage [www.editage.cn] for English language editing.

## Footnotes

**Contributors:** LYX and YSE contributed to the study conception and design, data collection, analysis, interpretation and drafting the manuscript. LYH and ZL contributed to questionnaire design and data collection. LYH and CC contributed to the data collection and data management. MD contributed to the study design, data acquisition and interpretation. All authors contributed to drafting the manuscript and critically revised the manuscript and approved the final version.

**Competing interests:** None declared.

**Funding:** This research did not receive any specific grant from funding agencies in the public, commercial, or not-for-profit sectors.

**Ethics approval:** The study was approved by the Institutional Review Board of Xiangya Hospital, Central South University (No. 201708955).

**Data sharing statement:** Extra data can be extracted by emailing the corresponding author YSE.

## References

1. Seymour CW, Liu VX, Iwashyna TJ, Brunkhorst FM, Rea TD, Scherag A, et al. Assessment of clinical criteria for sepsis: For the Third International Consensus Definitions for Sepsis and Septic Shock (Sepsis-3). *JAMA* 2016;315:762-74. doi: 10.1001/jama.2016.0288
2. Fleischmann C, Scherag A, Adhikari NK, Hartog CS, Tsaganos T, Schlattmann P, et al. Assessment of Global incidence and mortality of hospital-treated sepsis. Current estimates and limitations. *Am J Respir Crit Care Med* 2016;193:259-72. doi: 10.1164/rccm.201504-0781OC.
3. Boyce J M, Didier P. Guideline for hand hygiene in health-care settings: Recommendations of the Healthcare Infection Control Practices Advisory Committee and the HICPAC/ SHEA/ APIC/ IDSA Hand Hygiene Task Force. *Infect Control Hosp Epidemiol* 2002;30:S3-S40.
4. Pittet D, Allegranzi B, Boyce J. The World Health Organization Guidelines on Hand Hygiene in Health Care and Their Consensus Recommendations. *Infect Control Hosp Epidemiol* 2009;30:611-22. doi: 10.1086/600379.2009;30:611-22.
5. Saito H, Borzykowski T, Kilpatrick C, Pires D, Allegranzi B, Pittet D. "It's in your hands - prevent sepsis in health care"; 5 May 2018 World Health Organization (WHO) SAVE LIVES: Clean Your Hands campaign. *Am J Infect Control* 2018;39:1-2. doi: 10.1016/j.ajic.2018.02.006.
6. Meng X, Liu S, Duan J, et al. Risk factors and medical costs for healthcare-associated carbapenem-resistant *Escherichia coli* infection among hospitalized patients in a Chinese teaching hospital. *Bmc Infectious Diseases* 2017; 17(1): 82. doi:10.1186/s12879-016-2176-9.

- 1  
2  
3  
4  
5  
6  
7  
8  
9  
10  
11  
12  
13  
14  
15  
16  
17  
18  
19  
20  
21  
22  
23  
24  
25  
26  
27  
28  
29  
30  
31  
32  
33  
34  
35  
36  
37  
38  
39  
40  
41  
42  
43  
44  
45  
46  
47  
48  
49  
50  
51  
52  
53  
54  
55  
56  
57  
58  
59  
60
7. Li C, Duan J, Liu S, et al. Assessing the risk and disease burden of *Clostridium difficile* infection among patients with hospital-acquired pneumonia at a University Hospital in Central China. *Infection* 2017; 45(5): 621-628. doi: 10.1007/s15010-017-1024-1.
  8. Cao W, Zhou R, Ou X, et al. Prevalence of hepatitis B virus, hepatitis C virus, human immunodeficiency virus and *Treponema pallidum* infections in hospitalized patients before transfusion in Xiangya hospital Central South University, China from 2011 to 2016. *BMC Infectious Diseases* 2018; 18: 145. doi: 10.1186/s12879-018-3051-7.
  9. Landers T, Abusalem S, Coty MB, Bingham J. Patient-centered hand hygiene: the next step in infection prevention. *Am J Infect Control* 2012;40:S11-S17. doi: 10.1016/j.ajic.2012.02.006.
  10. <https://www.cdc.gov/handwashing/when-how-handwashing.html>
  11. Alzyood M, Jackson D, Brooke J, Aveyard H. An integrative review exploring the perceptions of patients and healthcare professionals towards patient involvement in promoting hand hygiene compliance in the hospital setting. *J Clin Nurs* 2018;27:1329-45. doi: 10.1111/jocn.14305.
  12. National Health Commission of the People's Republic of China. "Standard for hand hygiene for healthcare workers in healthcare settings" [S]. [2009-04-01/ 2009-12-01]. <http://www.nhfpc.gov.cn/zhuz/s9496/200904/40118/files/5fe4afce5b874512a9780c724a4d5be0.pdf>

- 1  
2  
3  
4  
5  
6  
7  
8  
9  
10  
11  
12  
13  
14  
15  
16  
17  
18  
19  
20  
21  
22  
23  
24  
25  
26  
27  
28  
29  
30  
31  
32  
33  
34  
35  
36  
37  
38  
39  
40  
41  
42  
43  
44  
45  
46  
47  
48  
49  
50  
51  
52  
53  
54  
55  
56  
57  
58  
59  
60
13. Cheng VC, Tai JW, Li WS. Implementation of directly observed patient hand hygiene for hospitalized patients by hand hygiene ambassadors in Hong Kong[J]. *Am J Infect Control* 2016; 44(6):621-624. doi: 10.1016/j.ajic.2015.11.024.
14. World Health Organization. A guide to the implementation of the WHO multimodal hand hygiene improvement strategy. Geneva, Switzerland: World Health Organization; 2009.
15. Taylor LJ. An evaluation of hand washing techniques. *Nurs Times* 1978;74:108-10.
16. Ardizzone LL, Smolowitz J, Kline N, Thorn B, Larson EL. Patient hand hygiene practices in surgical patients. *Am J Infect Control* 2013;41:487-91. doi: 10.1016/j.ajic.2012.05.029
17. Pokrywka M, Buraczewski M, Frank D, Dixon H, Ferrelli J, Shutt K, et al. Can improving patient hand hygiene impact *Clostridium difficile* infection events at an academic medical center? *Am J Infect Control* 2017;45:959-63. doi: 10.1016/j.ajic.2017.06.019
18. Huang GKL, Stewardson AJ, Grayson ML. Back to basics: hand hygiene and isolation. *Curr Opin Infect Dis* 2014;27:379-89. doi: 10.1097/QCO.0000000000000080
19. Mac W, Kiernan M, Wilson J, Loveday H, Bradley C. Assessment of the efficacy of a patient hand wipe: development of a test method. *J Hosp Infect* 2017;98:339-44. doi: 10.1016/j.jhin.2017.08.013
20. Srigley JA, Furness CD, Gardam M. Measurement of patient hand hygiene in multi-organ transplant units using a novel technology: an observational study. *Infect Control Hosp Epidemiol* 2014;35:1336-41. doi: 10.1086/678419.

- 1  
2  
3  
4  
5  
6 21. Knighton SC, Dolansky M, Donskey C, Warner C, Rai H, Higgins PA. Use of a verbal  
7  
8 electronic audio reminder with a patient hand hygiene bundle to increase independent patient  
9  
10 hand hygiene practices of older adults in an acute care setting. *Am J Infect Control*  
11  
12 2018;46:610-6. doi: 10.1016/j.ajic.2018.01.005  
13  
14  
15  
16 22. Rai H, Knighton S, Zabarsky TF, Donskey CJ. Comparison of ethanol hand sanitizer versus  
17  
18 moist towelette packets for mealtime patient hand hygiene. *Am J Infect Control* 2017;45:1033-4.  
19  
20 doi: 10.1016/j.ajic.2017.03.018.  
21  
22  
23  
24 23. Birnbach DJ, Rosen LF, Fitzpatrick M, Arheart KL, Munoz-Price LS. An evaluation of hand  
25  
26 hygiene in an intensive care unit: Are visitors a potential vector for pathogens? *J Infect Public*  
27  
28 *Health* 2015;8:570-4. doi: 10.1016/j.jiph.2015.04.027.  
29  
30  
31  
32 24. Okada J, Yamamizu Y, Fukai K. Effectiveness of hand hygiene depends on the patient's  
33  
34 health condition and care environment. *Jpn J Nurs Sci* 2016;13:413-23.  
35  
36 doi: 10.1111/jjns.12122  
37  
38  
39 25. Randle J, Arthur A, Vaughan N. Twenty-four hour observational study of hospital hand  
40  
41 hygiene compliance. *J Hosp Infect* 2010;76:252-5. doi: 10.1016/j.jhin.2010.06.027  
42  
43  
44 26. Lei J H, Guo Y J, Chen Z, et al. Problem/case-based learning with competition introduced in  
45  
46 severe infection education: an exploratory study. *Springerplus* 2016; 5(1):1821. doi:  
47  
48 10.1186/s40064-016-3532-3.  
49  
50  
51  
52  
53  
54  
55  
56  
57  
58  
59  
60

1  
2  
3  
4  
5 27. Xie J, Ming Y, Ding S, et al. Rising Need for Health Education Among Renal Transplant  
6 Patients and Caregiving Competence in Care Providers. *Progress in Transplantation* 2017;  
7  
8 27(2):180. doi: 10.1177/1526924817699962.  
9  
10

11  
12  
13 28. Scheithauer S, Oude-Aost J, Heimann K, Haefner H, Schwanz T, Waitschies B, et al. Hand  
14 hygiene in pediatric and neonatal intensive care unit patients: daily opportunities and indication-  
15 and profession-specific analyses of compliance. *Am J Infect Control* 2011;39:732-7.  
16  
17 doi:10.1016/j.ajic.2010.12.020.  
18  
19

20  
21 29. He L, Meng J, Huang D, et al. Multidrug-resistant *Acinetobacter Baumannii* infection in  
22 Intensive Care Unit: A retrospective analysis. *Zhong nan da xue xue bao. Yi xue ban = Journal*  
23 of Central South University. *Medical sciences* 2015; 40(12):1327-1332. doi:  
24  
25 10.11817/j.issn.1672-7347.2015.12.007.  
26  
27

28  
29 30. Zhou P, Xiong X, Li C, Wu A. Association of Length of Stay With Contamination of  
30 Multidrug-Resistant Organisms in the Environment and Colonization in the Rectum of Intensive  
31 Care Unit Patients in China. *Infect Control Hosp Epidemiol* 2016; 37(1):120-1.  
32  
33 doi: 10.1017/ice.2015.282.  
34  
35  
36  
37  
38  
39  
40  
41  
42  
43  
44  
45  
46  
47  
48  
49  
50  
51  
52  
53  
54  
55  
56  
57  
58  
59  
60

**Table 1** Demographic characteristics of the 310 patients and their family members or caregivers.

| Characteristic             | Participants (%) |
|----------------------------|------------------|
| Identity                   |                  |
| Patient                    | 242 (78.1)       |
| Family members/caregivers  | 68 (21.9)        |
| Sex                        |                  |
| Female                     | 145 (46.8)       |
| Male                       | 165 (53.2)       |
| Age, years                 |                  |
| <30                        | 57 (18.4)        |
| 30-39                      | 34 (11.0)        |
| 40-49                      | 56 (18.1)        |
| 50-59                      | 72 (23.2)        |
| ≥60                        | 91 (29.4)        |
| Education level            |                  |
| Primary or below           | 77 (24.8)        |
| Junior high school         | 88 (28.4)        |
| Senior high school         | 62 (20.0)        |
| Technical secondary school | 20 (6.5)         |
| College                    | 34 (11.0)        |
| Undergraduate              | 28 (9.0)         |
| Postgraduate or above      | 1 (0.3)          |
| Occupation                 |                  |
| Farmer                     | 67 (21.6)        |
| Workman                    | 27 (8.7)         |
| Clerk                      | 47 (15.2)        |
| Medical staff              | 2 (0.6)          |
| Teacher                    | 3 (1.0)          |
| Student                    | 13 (4.2)         |
| Freelancer                 | 34 (11.0)        |
| Unemployed                 | 45 (14.5)        |
| Retiree                    | 72 (23.2)        |
| Place of residence         |                  |
| Urban                      | 147 (47.4)       |
| Town                       | 53 (17.1)        |
| Village                    | 110 (35.5)       |
| Income (RMB/year)†         |                  |
| <50,000                    | 206 (66.5)       |



1  
2  
3  
4  
5  
6  
7  
8  
9  
10  
11  
12  
13  
14  
15  
16  
17  
18  
19  
20  
21  
22  
23  
24  
25  
26  
27  
28  
29  
30  
31  
32  
33  
34  
35  
36  
37  
38  
39  
40  
41  
42  
43  
44  
45  
46  
47  
48  
49  
50  
51  
52  
53  
54  
55  
56  
57  
58  
59  
60

|                                                                                |            |
|--------------------------------------------------------------------------------|------------|
| 50,000~100,000                                                                 | 80 (25.8)  |
| 100,000~200,000                                                                | 18 (5.8)   |
| >200,000                                                                       | 6 (1.9)    |
| Number of hospitalizations                                                     |            |
| 1                                                                              | 117 (37.7) |
| 2                                                                              | 74 (23.9)  |
| ≥3                                                                             | 119 (38.4) |
| The length of hospital stay at the time the questionnaire was completed (days) |            |
| 1-3                                                                            | 67 (21.6)  |
| 4-6                                                                            | 107 (34.5) |
| 7-9                                                                            | 49 (15.8)  |
| 10-13                                                                          | 51 (16.5)  |
| ≥14                                                                            | 36 (11.6)  |
| Ward                                                                           |            |
| Medical ward                                                                   | 110 (35.5) |
| Surgical ward                                                                  | 144 (46.5) |
| Obstetrics/gynecology ward                                                     | 23 (7.4)   |
| Pediatric ward                                                                 | 9 (2.9)    |
| Infectious diseases ward                                                       | 15 (4.8)   |
| Intensive care unit                                                            | 9 (2.9)    |
| Was surgery performed this time?                                               |            |
| Yes                                                                            | 132 (42.6) |
| No                                                                             | 178 (57.4) |
| Is there any infection?                                                        |            |
| Yes                                                                            | 86 (27.7)  |
| No                                                                             | 224 (72.3) |

---

† 50,000 RMB ≈ US\$7,209

**Table 2** Performance of hand hygiene and knowledge and attitudes among the 310 patients and their family members or caregivers.

| Items                                                    | Total n(%) |
|----------------------------------------------------------|------------|
| <b>Knowledge and attitude</b>                            |            |
| Have you received any education related to hand hygiene? |            |
| Yes                                                      | 147 (47.4) |
| No                                                       | 163 (52.6) |
| Hand hygiene knowledge sources                           |            |
| Television                                               | 76 (28.5)  |
| Newspaper                                                | 20 (7.5)   |
| Magazine                                                 | 18 (6.7)   |
| Internet                                                 | 37 (13.9)  |
| Medical staff                                            | 95 (35.6)  |
| Other                                                    | 21 (7.9)   |
| Do you know anything about hand hygiene?                 |            |
| Don't know                                               | 126 (40.6) |
| A little                                                 | 98 (31.6)  |
| Most                                                     | 44 (14.2)  |
| All                                                      | 42 (13.5)  |
| Is handwashing important for recovery from disease?      |            |
| Yes                                                      | 292 (94.2) |
| No                                                       | 18 (5.8)   |
| Can handwashing prevent infection in patients?           |            |
| Yes                                                      | 289 (93.2) |
| No                                                       | 21 (6.8)   |
| <b>Performance</b>                                       |            |
| How many times do you wash your hands every day?         |            |
| ≤2                                                       | 48 (15.5)  |
| 3~5                                                      | 145 (46.8) |
| 6~10                                                     | 69 (22.3)  |
| >10                                                      | 48 (15.5)  |
| How long does it take to wash your hands every time?     |            |
| <1 min                                                   | 152 (49.0) |
| 1~2 min                                                  | 135 (43.5) |
| ≥ 2 min                                                  | 23 (7.4)   |
| Handwashing ways <sup>†</sup>                            |            |
| Wash basin                                               | 560(18.9)  |
| Flowing water                                            | 1913(64.7) |

1  
2  
3  
4  
5  
6  
7  
8  
9  
10  
11  
12  
13  
14  
15  
16  
17  
18  
19  
20  
21  
22  
23  
24  
25  
26  
27  
28  
29  
30  
31  
32  
33  
34  
35  
36  
37  
38  
39  
40  
41  
42  
43  
44  
45  
46  
47  
48  
49  
50  
51  
52  
53  
54  
55  
56  
57  
58  
59  
60

|                                                |            |
|------------------------------------------------|------------|
| Alcohol-based hand rub                         | 484(16.4)  |
| Handwashing products <sup>†</sup>              |            |
| Tap water only                                 | 1797(46.6) |
| Hand sanitizer                                 | 516(13.4)  |
| Soap                                           | 987(25.6)  |
| Alcohol-based hand rub                         | 555(14.4)  |
| Ways in which you wipe your hands <sup>†</sup> |            |
| Hand towel                                     | 976(20.0)  |
| Any towel                                      | 819(17.5)  |
| Disposable tissues                             | 1012(21.6) |
| Clothes on my body                             | 410(8.8)   |
| Wave hands in the air                          | 873(18.7)  |
| Face towel                                     | 588(12.6)  |
| Do you have a dedicated hand towel?            |            |
| Yes                                            | 130 (41.9) |
| No                                             | 180 (58.1) |
| Times of hand towel washes every day           |            |
| 0                                              | 10(7.7)    |
| 1                                              | 32(24.6)   |
| 2                                              | 29(22.3)   |
| 3                                              | 25(19.2)   |
| 4                                              | 27(20.8)   |
| Wash once every few days                       | 7(5.4)     |

<sup>†</sup> ‘Handwashing ways’, ‘Handwashing products’, and ‘Ways in which you wipe your hands’ these three items are multiple topics, so each number of respondents is over the total number of respondents.

**Table 3** Patient hand hygiene moments.

| <b>Moments</b>                                                                         | <b>Seldom<br/>n(%)</b> | <b>Sometimes<br/>n(%)</b> | <b>Often<br/>n(%)</b> | <b>Always<br/>n(%)</b> | <b>Not<br/>applicable†</b> |
|----------------------------------------------------------------------------------------|------------------------|---------------------------|-----------------------|------------------------|----------------------------|
| 1. After using the toilet, bedpan, or commode                                          | 21(6.8)                | 15(4.8)                   | 39(12.6)              | 235(75.8)              | 0(0.0)                     |
| 2. When returning to the room after a test or procedure                                | 91(29.4)               | 43(13.8)                  | 54(17.4)              | 120(38.7)              | 0(0.0)                     |
| 3. Before eating                                                                       | 41(13.2)               | 37(11.9)                  | 68(21.9)              | 164(52.9)              | 0(0.0)                     |
| 4. Before drinking fluids                                                              | 160(51.6)              | 63(20.3)                  | 53(17.1)              | 34(11.0)               | 0(0.0)                     |
| 5. Before taking medicine                                                              | 130(41.9)              | 49(15.8)                  | 62(20.0)              | 66(21.3)               | 3(0.9)                     |
| 6. When visibly dirty                                                                  | 11(3.5)                | 9(2.9)                    | 23(7.4)               | 267(86.1)              | 0(0.0)                     |
| 7. Before touching any breaks in the skin<br>(e.g., wounds, dressing, tubes)           | 56(18.1)               | 36(11.6)                  | 61(19.7)              | 147(47.4)              | 10(3.1)                    |
| 8. Before any care procedures<br>(e.g., dialysis, IV‡ drug administration, injections) | 145(46.8)              | 54(17.4)                  | 52(16.8)              | 59(19.0)               | 0(0.0)                     |
| 9. Before dialysis, contact with IV lines or other tubes                               | 139(44.8)              | 60(19.4)                  | 44(14.2)              | 61(19.7)               | 6(1.9)                     |
| 10. After coughing, sneezing, or touching nose or mouth                                | 102(32.9)              | 61(19.7)                  | 61(19.7)              | 86(27.7)               | 0(0.0)                     |
| 11. Before interacting with visitors                                                   | 198(63.8)              | 37(11.9)                  | 38(12.3)              | 37(11.9)               | 0(0.0)                     |
| 12. After visitors leave                                                               | 190(61.3)              | 46(14.8)                  | 33(10.6)              | 41(13.2)               | 0(0.0)                     |
| 13. When there is concern about whether hands are clean                                | 78(25.1)               | 57(18.4)                  | 83(26.8)              | 87(28.1)               | 5(1.5%)                    |

† “Not applicable” represents patients who reported that they did not perform the procedure and therefore did not encounter that moment.

‡ “IV” intravenous.

**Table 4** Patients who “always” or “often” practiced hand hygiene in the different departments.

| Moments                                                                             | Medical<br>Wards<br>n/N(%) | Surgical<br>Wards<br>n/N(%) | Obstetrics/<br>gynecology<br>wards<br>n/N(%) | Pediatric<br>wards<br>n/N(%) | Infectious<br>diseases<br>wards<br>n/N(%) | ICU†<br>n/N(%) | Total<br>n/N(%) |
|-------------------------------------------------------------------------------------|----------------------------|-----------------------------|----------------------------------------------|------------------------------|-------------------------------------------|----------------|-----------------|
| 1. After using the toilet, bedpan, or commode                                       | 99/110(90.0)               | 136/144(94.4)               | 19/23(82.6)                                  | 7/9(77.8)                    | 10/15(66.7)                               | 3/9(33.3)      | 274/310(88.4)   |
| 2. When returning to the room after a test or procedure                             | 71/110(64.5)               | 75/144(52.1)                | 12/23(52.2)                                  | 7/9(77.8)                    | 7/15(46.7)                                | 2/9(22.2)      | 174/310(56.1)   |
| 3. Before eating                                                                    | 91/110(82.7)               | 108/144(75.0)               | 15/23(65.2)                                  | 7/9(77.8)                    | 9/15(60.0)                                | 2/9(22.2)      | 232/310(74.8)   |
| 4. Before drinking fluids                                                           | 35/110(31.8)               | 38/144(26.4)                | 4/23(17.4)                                   | 4/9(44.4)                    | 5/15(33.3)                                | 1/9(11.1)      | 87/310(28.1)    |
| 5. Before taking medicine                                                           | 45/110(40.9)               | 59/144(41.0)                | 12/23(52.2)                                  | 6/9(66.7)                    | 4/15(26.7)                                | 2/9(22.2)      | 128/310(41.3)   |
| 6. When visibly dirty                                                               | 106/110(96.4)              | 138/144(95.8)               | 22/23(95.7)                                  | 7/9(77.8)                    | 12/15(80.0)                               | 5/9(55.6)      | 290/310(93.5)   |
| 7. Before touching any breaks in the skin (e.g., wounds, dressing, tubes)           | 79/110(71.8)               | 98/144(68.1)                | 15/23(65.2)                                  | 5/9(55.6)                    | 9/15(60.0)                                | 2/9(22.2)      | 75/310(24.2)    |
| 8. Before any care procedures (e.g., dialysis, IV‡ drug administration, injections) | 41/110(37.3)               | 51/144(35.4)                | 8/23(34.8)                                   | 4/9(44.4)                    | 5/15(33.3)                                | 2/9(22.2)      | 111/310(35.8)   |
| 9. Before dialysis, contact with IV lines or other tubes                            | 37/110(33.6)               | 49/144(34.0)                | 9/23(39.1)                                   | 4/9(44.4)                    | 4/15(26.7)                                | 2/9(22.2)      | 105/310(33.9)   |
| 10. After coughing, sneezing, or touching the nose or mouth                         | 51/110(46.4)               | 73/144(50.7)                | 10/23(43.5)                                  | 4/9(44.4)                    | 7/15(46.7)                                | 2/9(22.2)      | 147/310(47.4)   |
| 11. Before interacting with visitors                                                | 23/110(20.9)               | 34/144(23.6)                | 8/23(34.8)                                   | 3/9(33.3)                    | 6/15(40.0)                                | 1/9(11.1)      | 75/310(24.2)    |
| 12. After visitors leave                                                            | 25/110(22.7)               | 32/144(22.2)                | 5/23(21.7)                                   | 4/9(44.4)                    | 6/15(40.0)                                | 2/9(22.2)      | 74/310(23.9)    |
| 13. When there is concern about whether hands are clean                             | 66/110(60.0)               | 72/144(50.0)                | 13/23(56.5)                                  | 6/9(66.7)                    | 9/15(60.0)                                | 4/9(44.4)      | 170/310(54.8)   |
| Kruskal-Wallis H                                                                    | 574.47                     | 556.01                      | 548.99                                       | 669.5                        | 535.47                                    | 196.56         | 19.838          |
| P-value                                                                             |                            |                             |                                              |                              |                                           |                | 0.001           |

† ICU, intensive care unit; ‡ IV, intravenous.

**Table 5** Identity of participants who “always” performed hand hygiene after using the toilet, bedpan, or commode using the characteristics of the patients and their family members of caregivers.

| Characteristic             | “Always” perform hand hygiene n/N (%) | Unadjusted OR <sup>†</sup> |         | Adjusted OR     |         |
|----------------------------|---------------------------------------|----------------------------|---------|-----------------|---------|
|                            |                                       | OR (95%CI <sup>‡</sup> )   | P-value | OR (95% CI)     | P-value |
| Identity                   |                                       |                            |         |                 |         |
| Patient                    | 186/242(76.9)                         | 1                          |         |                 |         |
| Family members/caregivers  | 49/68(72.1)                           | 0.78(0.42-1.43)            | 0.42    |                 |         |
| Sex                        |                                       |                            |         |                 |         |
| Male                       | 125/165(75.8)                         | 1                          |         |                 |         |
| Female                     | 110/145(75.9)                         | 0.99(0.59-1.67)            | 0.98    |                 |         |
| Age, years                 |                                       |                            |         |                 |         |
| <30                        | 39/57(68.4)                           | 1                          |         |                 |         |
| 30-39                      | 28/34(82.4)                           | 2.15(0.76-6.12)            | 0.15    |                 |         |
| 40-49                      | 43/56(76.8)                           | 1.53(0.66-3.52)            | 0.32    |                 |         |
| 50-59                      | 54/72(75.0)                           | 1.39(0.64-3.00)            | 0.41    |                 |         |
| ≥60                        | 71/91(78.9)                           | 1.64(0.78-3.46)            | 0.20    |                 |         |
| Education level            |                                       |                            |         |                 |         |
| Primary or below           | 59/77(76.6)                           | 1                          |         |                 |         |
| Junior high school         | 59/88(67.0)                           | 0.62(0.31-1.24)            | 0.18    |                 |         |
| Senior high school         | 51/62(82.3)                           | 1.41(0.61-3.27)            | 0.42    |                 |         |
| Technical secondary school | 14/20(70.0)                           | 0.71(0.24-2.12)            | 0.54    |                 |         |
| College                    | 28/34(82.4)                           | 1.42(0.51-3.98)            | 0.50    |                 |         |
| Undergraduate              | 23/28(82.1)                           | 1.40(0.47-4.22)            | 0.55    |                 |         |
| Postgraduate or above      | 1/1(100)                              | /                          | 1.00    |                 |         |
| Occupation                 |                                       |                            |         |                 |         |
| Farmer                     | 56/67(83.6)                           | 1                          |         | 1               |         |
| Workman                    | 23/27(85.2)                           | 1.13(0.33-3.92)            | 0.85    | 0.85(0.21-3.39) | 0.82    |
| Clerk                      | 34/47(72.3)                           | 0.51(0.21-1.28)            | 0.15    | 0.18(0.05-0.61) | 0.006   |

1  
2  
3  
4  
5  
6  
7  
8  
9  
10  
11  
12  
13  
14  
15  
16  
17  
18  
19  
20  
21  
22  
23  
24  
25  
26  
27  
28  
29  
30  
31  
32  
33  
34  
35  
36  
37  
38  
39  
40  
41  
42  
43  
44  
45  
46  
47

|                                                                                |               |                  |      |                 |       |
|--------------------------------------------------------------------------------|---------------|------------------|------|-----------------|-------|
| Medical staff                                                                  | 2/2(100)      | /                | 1.00 | /               | 1.00  |
| Teacher                                                                        | 2/3(66.7)     | 0.39(0.03-4.72)  | 0.46 | 0.15(0.01-2.26) | 0.17  |
| Student                                                                        | 8/13(61.5)    | 0.31(0.09-1.14)  | 0.08 | 0.22(0.04-1.24) | 0.09  |
| Freelancers                                                                    | 23/34(67.6)   | 0.41(0.16-1.08)  | 0.07 | 0.18(0.05-0.62) | 0.007 |
| Unemployed                                                                     | 34/45(75.6)   | 0.61(0.24-1.55)  | 0.30 | 0.58(0.21-1.61) | 0.29  |
| Retiree                                                                        | 53/72(73.6)   | 0.55(0.24-1.26)  | 0.16 | 0.36(0.12-1.08) | 0.07  |
| Place of residence                                                             |               |                  |      |                 |       |
| Urban                                                                          | 117/147(79.6) | 1                |      |                 |       |
| Town                                                                           | 37/53(69.8)   | 0.59(0.29-1.21)  | 0.15 |                 |       |
| Village                                                                        | 81/110(73.6)  | 0.72(0.40-1.28)  | 0.26 |                 |       |
| Income (RMB/year)                                                              |               |                  |      |                 |       |
| <50,000                                                                        | 153/206(74.3) | 1                |      |                 |       |
| 50,000~100,000                                                                 | 61/80(76.3)   | 1.11(0.61-2.03)  | 0.73 |                 |       |
| 100,000~200,000                                                                | 16/18(88.9)   | 2.77(0.62-12.46) | 0.18 |                 |       |
| >200,000                                                                       | 5/6(83.3)     | 1.73(0.20-15.16) | 0.62 |                 |       |
| Number of hospitalizations                                                     |               |                  |      |                 |       |
| 1                                                                              | 87/117(74.4)  | 1                |      |                 |       |
| 2                                                                              | 59/74(79.7)   | 1.36(0.67-2.74)  | 0.40 |                 |       |
| ≥3                                                                             | 89/119(74.8)  | 1.02(0.57-1.84)  | 0.94 |                 |       |
| The length of hospital stay at the time the questionnaire was completed (days) |               |                  |      |                 |       |
| 1-3                                                                            | 22/67(32.8)   | 1                |      |                 |       |
| 4-6                                                                            | 32/107(29.9)  | 0.87(0.45-1.68)  | 0.69 |                 |       |
| 7-9                                                                            | 13/49(26.5)   | 0.74(0.33-1.67)  | 0.47 |                 |       |
| 10-13                                                                          | 15/51(29.4)   | 0.85(0.39-1.88)  | 0.69 |                 |       |
| ≥14                                                                            | 9/36(25.0)    | 0.68(0.27-1.70)  | 0.41 |                 |       |
| Ward                                                                           |               |                  |      |                 |       |
| Medical ward                                                                   | 86/110(78.2)  | 1                |      | 1               |       |
| Surgical ward                                                                  | 117/144(81.3) | 1.21(0.65-2.24)  | 0.55 | 1.27(0.58-2.80) | 0.55  |
| Obstetrics/gynecology ward                                                     | 14/23(60.9)   | 0.43(0.17 -1.13) | 0.09 | 0.18(0.04-0.80) | 0.02  |

|    |                                  |               |                 |       |                 |       |
|----|----------------------------------|---------------|-----------------|-------|-----------------|-------|
| 1  |                                  |               |                 |       |                 |       |
| 2  |                                  |               |                 |       |                 |       |
| 3  | Pediatric ward                   | 6/9(66.7)     | 0.56(0.13-3.40) | 0.43  | 0.95(0.12-7.39) | 0.96  |
| 4  | Infectious diseases ward         | 10/15(66.7)   | 0.56(0.17-1.79) | 0.33  | 0.51(0.13-2.04) | 0.34  |
| 5  | ICU <sup>§</sup>                 | 2/9(22.2)     | 0.08(0.02-0.41) | 0.002 | 0.06(0.01-0.45) | 0.006 |
| 6  |                                  |               |                 |       |                 |       |
| 7  | Was surgery performed this time? |               |                 |       |                 |       |
| 8  |                                  |               |                 |       |                 |       |
| 9  | No                               | 135/178(75.8) | 1               |       |                 |       |
| 10 | Yes                              | 100/132(75.8) | 1.01(0.59-1.70) | 0.99  |                 |       |
| 11 |                                  |               |                 |       |                 |       |
| 12 | Is there any infection?          |               |                 |       |                 |       |
| 13 | No                               | 171/224(76.3) | 1               |       |                 |       |
| 14 | Yes                              | 64/86(74.4)   | 1.11(0.63-1.97) | 0.72  |                 |       |
| 15 |                                  |               |                 |       |                 |       |

† OR, odds ratio; ‡ CI, confidence interval; § ICU, intensive care unit.



1  
2  
3  
4  
5 **Figure legends**  
6

7 **Supplemental figure 1. Seven-steps to handwashing**  
8

- 9 1. Rub palms together  
10 2. Rub the back of both hands  
11 3. Interlace fingers and rub hands together  
12 4. Interlock fingers and rub the back of fingers of both hands  
13 5. Rub thumb in a rotating manner followed by the area between index finger and  
14 thumb for both hands  
15 6. Rub fingers on palm for both hands  
16 7. Rub both wrists in a rotating manner  
17  
18  
19  
20  
21  
22  
23  
24  
25  
26  
27  
28  
29  
30  
31  
32  
33  
34  
35  
36  
37  
38  
39  
40  
41  
42  
43  
44  
45  
46  
47  
48  
49  
50  
51  
52  
53  
54  
55  
56  
57  
58  
59  
60

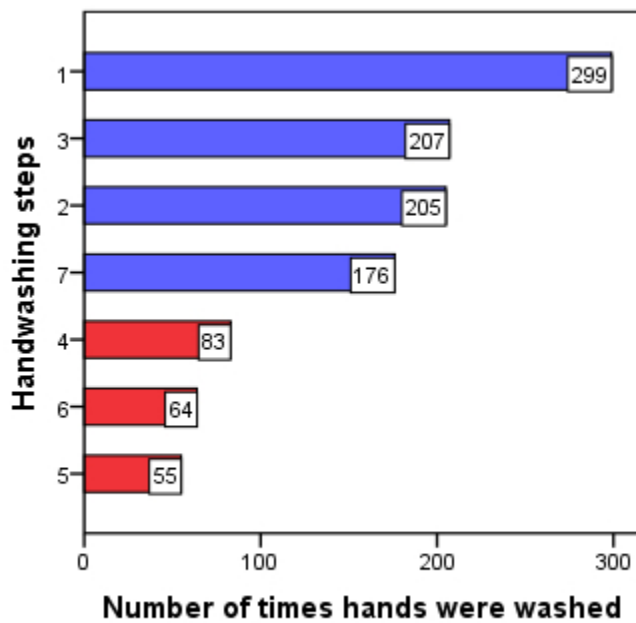

28x28mm (300 x 300 DPI)

## Supplementary File 1

STROBE Statement—Checklist of items that should be included in reports of *cross-sectional studies*

|                              | Item No | Recommendation                                                                                                                                                                                    | Page No |
|------------------------------|---------|---------------------------------------------------------------------------------------------------------------------------------------------------------------------------------------------------|---------|
| <b>Title and abstract</b>    | 1       | (a) Indicate the study's design with a commonly used term in the title or the abstract                                                                                                            | 1       |
|                              |         | (b) Provide in the abstract an informative and balanced summary of what was done and what was found                                                                                               | 1-2     |
| <b>Introduction</b>          |         |                                                                                                                                                                                                   |         |
| Background/rationale         | 2       | Explain the scientific background and rationale for the investigation being reported                                                                                                              | 4       |
| Objectives                   | 3       | State specific objectives, including any prespecified hypotheses                                                                                                                                  | 4-5     |
| <b>Methods</b>               |         |                                                                                                                                                                                                   |         |
| Study design                 | 4       | Present key elements of study design early in the paper                                                                                                                                           | 5       |
| Setting                      | 5       | Describe the setting, locations, and relevant dates, including periods of recruitment, exposure, follow-up, and data collection                                                                   | 5       |
| Participants                 | 6       | (a) Give the eligibility criteria, and the sources and methods of selection of participants                                                                                                       | 5       |
| Variables                    | 7       | Clearly define all outcomes, exposures, predictors, potential confounders, and effect modifiers. Give diagnostic criteria, if applicable                                                          | 6-7     |
| Data sources/<br>measurement | 8*      | For each variable of interest, give sources of data and details of methods of assessment (measurement). Describe comparability of assessment methods if there is more than one group              | 6-8     |
| Bias                         | 9       | Describe any efforts to address potential sources of bias                                                                                                                                         | 6,7,8   |
| Study size                   | 10      | Explain how the study size was arrived at                                                                                                                                                         | 6       |
| Quantitative variables       | 11      | Explain how quantitative variables were handled in the analyses. If applicable, describe which groupings were chosen and why                                                                      | 6-7     |
| Statistical methods          | 12      | (a) Describe all statistical methods, including those used to control for confounding                                                                                                             | 8-9     |
|                              |         | (b) Describe any methods used to examine subgroups and interactions                                                                                                                               | 9       |
|                              |         | (c) Explain how missing data were addressed                                                                                                                                                       | 9       |
|                              |         | (d) If applicable, describe analytical methods taking account of sampling strategy                                                                                                                | 9       |
|                              |         | (e) Describe any sensitivity analyses                                                                                                                                                             | 9       |
| <b>Results</b>               |         |                                                                                                                                                                                                   |         |
| Participants                 | 13*     | (a) Report numbers of individuals at each stage of study—eg numbers potentially eligible, examined for eligibility, confirmed eligible, included in the study, completing follow-up, and analysed | 9       |
|                              |         | (b) Give reasons for non-participation at each stage                                                                                                                                              | 9       |
|                              |         | (c) Consider use of a flow diagram                                                                                                                                                                | 9       |
| Descriptive data             | 14*     | (a) Give characteristics of study participants (eg demographic, clinical, social) and information on exposures and potential confounders                                                          | 9       |
|                              |         | (b) Indicate number of participants with missing data for each variable of interest                                                                                                               | 9       |
| Outcome data                 | 15*     | Report numbers of outcome events or summary measures                                                                                                                                              | 9       |

|    |                          |    |                                                                                     |
|----|--------------------------|----|-------------------------------------------------------------------------------------|
| 1  |                          |    |                                                                                     |
| 2  | Main results             | 16 | (a) Give unadjusted estimates and, if applicable, confounder-adjusted               |
| 3  |                          |    | estimates and their precision (eg, 95% confidence interval). Make clear             |
| 4  |                          |    | which confounders were adjusted for and why they were included                      |
| 5  |                          |    |                                                                                     |
| 6  |                          |    | (b) Report category boundaries when continuous variables were categorized           |
| 7  |                          |    |                                                                                     |
| 8  |                          |    | (c) If relevant, consider translating estimates of relative risk into absolute risk |
| 9  |                          |    | for a meaningful time period                                                        |
| 10 |                          |    |                                                                                     |
| 11 | Other analyses           | 17 | Report other analyses done—eg analyses of subgroups and interactions, and           |
| 12 |                          |    | sensitivity analyses                                                                |
| 13 |                          |    |                                                                                     |
| 14 | <b>Discussion</b>        |    |                                                                                     |
| 15 | Key results              | 18 | Summarise key results with reference to study objectives                            |
| 16 | Limitations              | 19 | Discuss limitations of the study, taking into account sources of potential bias     |
| 17 |                          |    | or imprecision. Discuss both direction and magnitude of any potential bias          |
| 18 |                          |    |                                                                                     |
| 19 | Interpretation           | 20 | Give a cautious overall interpretation of results considering objectives,           |
| 20 |                          |    | limitations, multiplicity of analyses, results from similar studies, and other      |
| 21 |                          |    | relevant evidence                                                                   |
| 22 |                          |    |                                                                                     |
| 23 | Generalisability         | 21 | Discuss the generalisability (external validity) of the study results               |
| 24 |                          |    |                                                                                     |
| 25 | <b>Other information</b> |    |                                                                                     |
| 26 | Funding                  | 22 | Give the source of funding and the role of the funders for the present study        |
| 27 |                          |    | and, if applicable, for the original study on which the present article is based    |
| 28 |                          |    |                                                                                     |
| 29 |                          |    |                                                                                     |
| 30 |                          |    |                                                                                     |
| 31 |                          |    |                                                                                     |
| 32 |                          |    |                                                                                     |
| 33 |                          |    |                                                                                     |
| 34 |                          |    |                                                                                     |
| 35 |                          |    |                                                                                     |
| 36 |                          |    |                                                                                     |
| 37 |                          |    |                                                                                     |
| 38 |                          |    |                                                                                     |
| 39 |                          |    |                                                                                     |
| 40 |                          |    |                                                                                     |
| 41 |                          |    |                                                                                     |
| 42 |                          |    |                                                                                     |
| 43 |                          |    |                                                                                     |
| 44 |                          |    |                                                                                     |
| 45 |                          |    |                                                                                     |
| 46 |                          |    |                                                                                     |
| 47 |                          |    |                                                                                     |
| 48 |                          |    |                                                                                     |
| 49 |                          |    |                                                                                     |
| 50 |                          |    |                                                                                     |
| 51 |                          |    |                                                                                     |
| 52 |                          |    |                                                                                     |
| 53 |                          |    |                                                                                     |
| 54 |                          |    |                                                                                     |
| 55 |                          |    |                                                                                     |
| 56 |                          |    |                                                                                     |
| 57 |                          |    |                                                                                     |
| 58 |                          |    |                                                                                     |
| 59 |                          |    |                                                                                     |
| 60 |                          |    |                                                                                     |

# BMJ Open

## Knowledge and Practice of Hand Hygiene Among Hospitalized Patients in a Tertiary General Hospital in China and Their Attitudes: A Cross-Sectional Survey

|                                 |                                                                                                                                                                                                                                                                                                                                        |
|---------------------------------|----------------------------------------------------------------------------------------------------------------------------------------------------------------------------------------------------------------------------------------------------------------------------------------------------------------------------------------|
| Journal:                        | <i>BMJ Open</i>                                                                                                                                                                                                                                                                                                                        |
| Manuscript ID                   | bmjopen-2018-027736.R2                                                                                                                                                                                                                                                                                                                 |
| Article Type:                   | Research                                                                                                                                                                                                                                                                                                                               |
| Date Submitted by the Author:   | 26-Feb-2019                                                                                                                                                                                                                                                                                                                            |
| Complete List of Authors:       | LI, Yunxia; Xiangya Hospital Central South University, LIU, Yaohong; Xiangya Hospital Central South University, ZENG, Li; Xiangya Hospital Central South University, CHEN, Chong; Xiangya Hospital Central South University, MO, Dan; Xiangya Hospital Central South University, YUAN, Sue; Xiangya Hospital Central South University, |
| <b>Primary Subject Heading</b>: | Public health                                                                                                                                                                                                                                                                                                                          |
| Secondary Subject Heading:      | Health services research, Infectious diseases, Medical education and training, Public health                                                                                                                                                                                                                                           |
| Keywords:                       | Infection control < INFECTIOUS DISEASES, Public health < INFECTIOUS DISEASES, Epidemiology < INFECTIOUS DISEASES                                                                                                                                                                                                                       |
|                                 |                                                                                                                                                                                                                                                                                                                                        |

SCHOLARONE™  
Manuscripts

1  
2  
3  
4  
5 **Knowledge and Practice of Hand Hygiene Among Hospitalized Patients in a**  
6 **Tertiary General Hospital in China and Their Attitudes: A Cross-Sectional**  
7 **Survey**  
8  
9  
10  
11  
12

13 LI Yunxia<sup>1,2</sup>, LIU Yaohong<sup>3</sup>, ZENG Li<sup>4</sup>, CHEN Chong<sup>5</sup>, MO Dan<sup>1</sup>, YUAN Sue<sup>1,2\*</sup>  
14  
15

16 <sup>1</sup> Infectious Diseases Department, Xiangya Hospital of Central South University, Changsha,  
17  
18 China  
19  
20

21 <sup>2</sup> Xiangya Nursing School, Central South University, Changsha, China  
22

23 <sup>3</sup> Colorectal and Anal Surgical Department, Xiangya Hospital of Central South  
24  
25 University, Changsha, China  
26  
27

28 <sup>4</sup> Burns Department, Xiangya Hospital of Central South University, Changsha, China  
29  
30

31 <sup>5</sup> Cardiology Department, Xiangya Hospital of Central South University, Changsha,  
32  
33 China  
34  
35

36 **\*Correspondence to** YUAN Sue, PhD, RN, Infectious Diseases Department, Xiangya Hospital  
37  
38 of Central South University, 87 Xiangya Rd, Changsha, Hunan 410008, P.R. China.  
39  
40

41 **Tel:** +86 13873158943; **E-mail address:** 248143918@qq.com  
42  
43  
44  
45  
46  
47  
48  
49  
50  
51  
52  
53  
54  
55  
56  
57  
58  
59  
60

## Abstract

**Objectives:** We aimed to gain a better understanding of patients' practice of hand hygiene and their knowledge and attitudes.

**Design:** A Cross-Sectional Survey.

**Setting:** A 3500-bed university-affiliated medical hospital in China.

**Participants:** Inpatients and their family members or caregivers.

**Methods:** An anonymous, self-reported questionnaire were used to collect data.

**Results:** A total of 376 questionnaires were issued, and 310 respondents completed it. Of the 310 respondents, 47.4% had received hand hygiene education, and 13.5% had a completing understanding of hand hygiene. A majority of patients believed that handwashing was important for disease recovery, and that it could prevent infection development. A total of 62.3% of patients washed their hands less than 5 times a day and 49.0% spent less than 1 minute every time. With regards to the seven steps of handwashing, 96.45% of the respondents adhered to the first step (washing the palms), but only 20.6% adhered to the fifth step (thumbs) and 17.7% to the sixth step (fingertips). Most respondents washed their hands only when visibly dirty. Few patients washed their hands before drinking fluids, and before and after interacting with visitors. Hand hygiene compliance was lower among ICU patients than medical patients.

**Conclusions:** In conclusion, this study demonstrated that patients had a positive attitude towards hand hygiene. However, their levels of knowledge and practice were unsatisfactory. A

1  
2  
3  
4  
5  
6  
7  
8  
9  
10  
11  
12  
13  
14  
15  
16  
17  
18  
19  
20  
21  
22  
23  
24  
25  
26  
27  
28  
29  
30  
31  
32  
33  
34  
35  
36  
37  
38  
39  
40  
41  
42  
43  
44  
45  
46  
47  
48  
49  
50  
51  
52  
53  
54  
55  
56  
57  
58  
59  
60

systematical education about patient hand hygiene is needed in future to correct this knowledge and behavior.

**Keywords:** Patient hand hygiene, Inpatient, Health care-associated infection, China

### Strengths and limitations of this study

- We measured the hand hygiene knowledge, attitude, and performance from the prospects of patient view.
- We designed the questionnaire combines both WHO and CDC patient hand hygiene related policies.
- A stratified random sampling method was used in order to make the sample representative.
- This is a single-center cross-sectional survey, our results may not be applicable to all other institutions.
- There is a need for further observational studies including quantitative hand bacterial cultures to verify the results of this study.



## INTRODUCTION

Health care-associated infections (HCAIs) are major risk factors for the development of sepsis,<sup>1</sup> which affects more than 30 million patients every year worldwide, leading to 6 million potential deaths.<sup>2</sup> Both the Centers for Disease Control and Prevention (CDC) and World Health Organization (WHO) consider hand hygiene (HH) to be the most important factor in the prevention of HCAIs and the spread of pathogens.<sup>3,4</sup> The practice of effective HH plays a key role in the prevention of health-care-associated sepsis.<sup>5</sup> Great efforts have been made to improve the performance of “My 5 moments for hand hygiene” among health-care workers (HCWs), and this has had a global improvement. However, the role of patient hand hygiene (PHH) has been underestimated. Emerging evidence suggests that most infections occur as a result of bacteria present within a patient’s own flora as well as bacteria present on surfaces within the health-care environment;<sup>6-8</sup> improving the hand hygiene of patients has important clinical significance in reducing nosocomial infection, improving the quality of life of patients and reducing the rate of hospitalization and mortality.<sup>9</sup> The CDC has therefore proposed nine moments for patients to practice hand hygiene in clinical institutions.<sup>10</sup> However, PHH has been neglected in most medical institutions in China, there were no information provided for patient when they admitted. And also there were few studies have investigated PHH in China, with some of them only focusing on the role of patients as monitors or auditors in the improvement of HCW HH compliance.<sup>11</sup> Thus, the purpose of this cross-sectional study was to investigate inpatient

1  
2  
3  
4  
5 knowledge, as well as the attitudes towards and practice of PHH during hospital stay with  
6  
7  
8 non-provision of PHH information. We also aim to characterize and identify some factors  
9  
10 influencing practice compliance, which may contribute to the design of effective patient hand  
11  
12 hygiene promotion strategies.  
13  
14

## 15 **METHODS**

16  
17  
18 This cross-sectional, single-center study was performed at a 3500-bed university-affiliated  
19  
20 medical hospital between November 2017 and December 2017. The study was approved by the  
21  
22 hospital's institutional review board (No. 201708955).  
23  
24

25  
26 In this study, PHH was defined as HH practices performed by a patient on his or her own  
27  
28 hands, including handwashing, and the use of alcohol-based hand rubs (ABHRs) and disinfecting  
29  
30 wipes.<sup>9</sup> In certain situations, this care may have to be provided to patients by professional  
31  
32 caregivers or family members.  
33  
34  
35

### 36 **Participants**

37  
38  
39 The study was conducted in 71 clinical wards, including the departments of internal  
40  
41 medicine, surgery, obstetrics and gynecology, pediatrics and infectious diseases, and intensive  
42  
43 care units (ICUs). Outpatient wards, operating rooms, psychiatric wards, isolation wards, and  
44  
45 emergency rooms were excluded.  
46  
47  
48

49  
50 Patients were enrolled through a random sampling method using a random number table.  
51  
52 Firstly, data on the number of beds in each ward were obtained from the hospital management  
53  
54  
55  
56  
57  
58  
59  
60

1  
2  
3  
4  
5 department, and a total of 3,000 of these beds met our inclusion criteria in terms of ward type.  
6  
7  
8 Secondly, according to the largest sample size formula of simple random sampling, with values  
9  
10 of  $\Pi=0.5$ ,  $\alpha=0.05$ , and  $\delta=0.05$ , a total sample size of 385 was obtained. After correction, the  
11  
12 required sample size was 342, but taking into consideration a no-response rate of 10%, a total of  
13  
14 376 patients were required. Finally, patients from each ward were randomly selected using an 8:1  
15  
16 proportion.  
17  
18  
19

20  
21 Hospitalized patients who provided verbal informed consent and agreed to voluntarily  
22  
23 participate in this study were included. Exclusion criteria were: patients with an admission time  
24  
25 less than 24 hours, patients who did not return to their bed due to surgery or transfer to the ICU,  
26  
27 and those with mental status changes. Family members or caregivers were enrolled to represent  
28  
29 patients to provide patients' demographic information, attitude and the HH care they have  
30  
31 provided to patients in the case of patients with impaired consciousness, who were critically ill,  
32  
33 or who were under the age of 14 years. Only family members who stayed with the patients in the  
34  
35 wards for more than 1 day were enrolled. Visitors, friends, and family members who had only  
36  
37 short visits with the patients were excluded. The nurses who were in charge of the eligible  
38  
39 patients were selected.  
40  
41  
42  
43  
44  
45

## 46 47 **Questionnaires**

48  
49 In this study, the survey instrument was a self-designed structured questionnaire that was  
50  
51 based on "When should you wash your hands" released by the CDC in 2016,<sup>10</sup> and the "Standard  
52  
53  
54  
55  
56  
57  
58  
59  
60

1  
2  
3  
4  
5 for hand hygiene for health care workers in health care settings” issued by the National Health  
6  
7  
8 Commission of the People's Republic of China in 2009.<sup>12</sup> Experts from the Department of  
9  
10  
11 Infectious Diseases were also consulted in this regard. The questionnaire comprised two parts.  
12  
13 The first part was designed to allow for the primary nurse to assess the elicited patient disease  
14  
15 information, such as diagnosis, whether surgery was performed, or if there was any infection  
16  
17 during the hospital stay.  
18  
19

20  
21 The second part pertaining to PHH was designed for patients and their families or  
22  
23 caregivers, and comprises 4 sections. Section 1 pertained to patients’ demographic data,  
24  
25 including ward type, bed number, place of residence, income, and number of hospitalizations.  
26  
27 Section 2 pertained to caregiver information, such as if the respondent is a family member or  
28  
29 caregiver, his/her relationship with the patient, length of hospital stay, education, and occupation.  
30  
31 Section 3 addressed PHH knowledge and attitudes, while Section 4 evaluated patients’ practice  
32  
33 of HH, including handwashing moments, steps, number of wash times daily, minutes taken every  
34  
35 time, and ways in which hands were dried. The PHH moments were scaled as ‘seldom’,  
36  
37 ‘sometimes’, ‘often’, and ‘always’. ‘Not applicable’ was selected for those who reported that  
38  
39 they did not perform the procedure and therefore did not encounter that moment.  
40  
41  
42  
43  
44  
45

## 46 47 **Implementation**

48  
49 The survey was conducted by eight research assistants, all of whom were team members  
50  
51 who participated in all study meetings and discussions, who had knowledge on HH and its  
52  
53  
54  
55  
56  
57  
58  
59  
60

1  
2  
3  
4  
5 association with HCAI, and who had received unified training on how to fill out the  
6  
7  
8 questionnaire. The research assistants first obtained approval from the head nurses in the study  
9  
10  
11 wards, and then obtained informed consent from the participants who were selected according to  
12  
13 our design. Participants were informed that the questionnaire content would not involve invasive  
14  
15 measurements or invade privacy, and would not cause injury to the body or mind. All eligible  
16  
17 patients and their families/caregivers were informed that participation in the study was  
18  
19 voluntarily, and that refusal to participate or withdrawal from the study at any point for any  
20  
21 reason would not influence medical decisions. The participants were assured that their  
22  
23 information would only be used for research and that strict confidentiality would be maintained,  
24  
25 as well as that their data would not be used for business or other purposes without their  
26  
27 permission. The questionnaires were distributed to patients who were agreed to voluntary  
28  
29 participation in research, and were completed by respondents themselves under the instructions  
30  
31 of researchers. The questionnaires were distributed and collected on the spot through SO JUMP  
32  
33 (a professional online questionnaire platform). A small gift (a piece of soap) valued at  
34  
35 approximately \$0.50 was given to each respondent who completed the questionnaire.  
36  
37  
38  
39  
40  
41  
42  
43

#### 44 **Patient and public involvement**

45  
46  
47 The current study did not include patient and public involvement.  
48

#### 49 **Statistical analysis**

50  
51  
52  
53  
54  
55  
56  
57  
58  
59  
60

1  
2  
3  
4  
5  
6  
7  
8  
9  
10  
11  
12  
13  
14  
15  
16  
17  
18  
19  
20  
21  
22  
23  
24  
25  
26  
27  
28  
29  
30  
31  
32  
33  
34  
35  
36  
37  
38  
39  
40  
41  
42  
43  
44  
45  
46  
47  
48  
49  
50  
51  
52  
53  
54  
55  
56  
57  
58  
59  
60

Questionnaire data are presented as the number of participants and percentages. A Kruskal-Wallis H test was applied to analyze the PHH implementation rate in the different departments. Binary logistic regression analysis was used to identify the demographic predictors for the respondents who had performed HH in the moment “after using the toilet, bedpan, or commode”. Only those who responded “always” were included in the analysis. Univariate analysis by non-conditional logistic regression was used to compare each demographic variable in the different groups. Variables with a *P* value <.10 were further tested in the multivariate logistic regression analysis by the enter method. A 2-tailed *P* value of 0.05 was considered statistically significant.

## RESULTS

### Population characteristics

A total of 376 questionnaires were issued, and 310 respondents, including 242 patients (78.1%) and 68 family members/ caregivers (21.9%), completed the questionnaire. The total response rate was 82.4% (310 of 376). The Cronbach’s alpha of the questionnaire is 0.867, which indicate a good reliability of this self-designed questionnaire. The respondents’ characteristics are summarized in Table 1. A total of 46.8% of the participants were women, and most of them (86.8%) were married. The majority (79.7%) had a high school education or lower. More than half of the participants (64.5%) were urban or town dwellers, and a similar proportion

1  
2  
3  
4  
5 (66.5%) had an annual income <50,000 RMB (~US\$7,987). Most respondents (62.3%) had been  
6  
7  
8 hospitalized previously, and 27.7% reported having an infection at present.  
9

### 10 **Patients' performance of hand hygiene and their knowledge and attitudes**

11  
12  
13 Most of the participants (72.2%) reported that they did not know about HH knowledge or  
14  
15 knew very little about it. Less than half (47.4%) of the respondents had received HH education  
16  
17 before; of them, HCWs (95, 35.6%) and television (76, 28.5%) were the main resources. A  
18  
19 majority (94.2%) of the participants believed that handwashing was important for disease  
20  
21 recovery, and almost the same percentage (93.2%) of them believed that handwashing could  
22  
23 prevent infection spread among patients.  
24  
25  
26  
27

28  
29 More than half (62.2%) of the patients washed their hands less than 5 times a day, and  
30  
31 approximately half (49.0%) of them spent less than 1 minute washing their hands every time.  
32  
33  
34 Washing hands under flowing water (64.7%) was the main route of washing, compared to  
35  
36 washing in a basin or using ABHRs; however, only 13.4% and 25.6% of the patients used hand  
37  
38 sanitizers and soap, respectively. A total of 41.9% of the respondents reported that they had a  
39  
40 dedicated hand towel, but only 20.0% and 21.6%, respectively, chose a dedicated hand towel or  
41  
42 tissue to wipe their hands (Table 2).  
43  
44  
45  
46

### 47 **Patients' practice of the '7 steps to handwashing'**

48  
49 The results of patients' practice of the '7 steps to handwashing' are displayed in  
50  
51 Supplemental figure 1. Most respondents washed their hands with adherence to the first step (rub  
52  
53  
54  
55  
56  
57  
58  
59  
60

1  
2  
3  
4  
5 palms together: 96.45%, 299 of 310). More than half of them practiced the second step (rub the  
6  
7  
8 back of both hands: 66.13%, 205 of 310) and third step (interlace fingers and rub hands together:  
9  
10 66.77%, 207 of 310). A slightly lower number of participants (56.77%, 176 of 310) adhered to  
11  
12 the seventh step (rub both wrists in a rotating manner). The implementation rates of the fourth  
13  
14 step (interlock fingers and rub the back of fingers of both hands: 26.77%, 83 of 310), and sixth  
15  
16 step (rub fingers on palm for both hands: 20.65%, 64 of 310) were lower. However, the fifth step  
17  
18 (rub thumb in a rotating manner followed by the area between index finger and thumb for both  
19  
20 hands) had the worst execution rate (17.74%, 55 of 310).

### 26 **Patient hand hygiene moments**

27  
28  
29 Three-quarters (75.8%; 235 of 310) of the respondents washed their hands after using the  
30  
31 toilet/bedpan/commode, and 86.1% washed their hands when they were visibly dirty (Table 3).  
32  
33  
34 Approximately half (47.7%) of the patients washed their hands before touching any breaks in the  
35  
36 skin, whereas the implementation rates before any care procedures (19.0%, 59 of 310) and  
37  
38 dialysis/contact with IV lines or other tubes (19.7%, 61 of 310) were low. The performance of  
39  
40 handwashing before drinking fluids (11.0%, 34 of 310), as well as before and after interacting  
41  
42 with visitors (11.9%, 37 of 310 vs 13.2%, 41 of 310) was also very low.  
43  
44  
45

### 47 **Patient hand hygiene moments in different departments**

48  
49  
50 Participants in the Department of Internal Medicine had a relatively high execution rate of  
51  
52 HH when their hands were visibly dirty (96.4%, 106 of 110), before eating (82.7%, 91 of 110),  
53  
54  
55  
56  
57  
58  
59  
60



1  
2  
3  
4  
5 and before touching any breaks in the skin (71.8%, 79 of 110). Those in the Department of  
6  
7  
8 Surgery tended to wash their hands after using the toilet/bedpan/commode (94.4%, 136 of 144)  
9  
10 and after coughing, sneezing, or touching the nose or mouth (50.7%, 73 of 144). Those in the  
11  
12 Department of Infectious Diseases had good performance rates of handwashing before  
13  
14 interacting with visitors (40.0%, 6 of 15) (Table 4). There were significant differences in this  
15  
16 regard between the different departments in the Kruskal-Wallis H test ( $H=19.838$ ,  $P=0.001$ ).  
17  
18  
19  
20

### 21 **Significant predictors of PHH moments**

22  
23  
24 A majority of the respondents (75.8%, 235 of 310) “Always” performed HH after using the  
25  
26 toilet/ bedpan/commode (Table 5), and the univariate analysis identified one significant predictor:  
27  
28 very few ICU patients practiced HH compared to medical patients (odds ratio [OR]= 0.08, 95%  
29  
30 confidence interval [CI]: 0.02-0.41,  $P = 0.002$ ). In the multivariate analysis, we found two  
31  
32 significant variables: being a farmer rather than a clerk (adjusted OR= 0.18, 95% CI: 0.05-0.61,  
33  
34  $P =0.004$ ) and being a freelancer (adjusted OR=0.18, 95% CI: (0.05-0.62,  $P =0.007$ ). Medical  
35  
36 patients had a higher HH performance rate than those in the Department of  
37  
38 Obstetrics-Gynecology (adjusted OR= 0.18, 95% CI: 0.04-0.80,  $P =0.02$ ) and ICU (adjusted  
39  
40 OR= 0.06, 95% CI: 0.01-0.45,  $P =0.006$ ).  
41  
42  
43  
44  
45  
46

### 47 **DISCUSSION**

48  
49 In the present study, we examined hospitalized patients’ knowledge of, attitudes towards,  
50  
51 and practice of HH. Our findings demonstrate that although patients had a positive attitude  
52  
53  
54  
55  
56  
57  
58  
59  
60

1  
2  
3  
4  
5 towards HH, their knowledge was insufficient, consistent with Cheng VC et al's research<sup>13</sup>.  
6  
7  
8 The social desirability factor might be operating, the hospital we involved attaches great  
9  
10 importance to HCW HH and has implemented the WHO's multimodal HH improvement  
11  
12 strategies;<sup>14</sup> therefore, the participants were in an atmosphere in which the importance of HH is  
13  
14 highlighted daily, leading them to believe in its importance. However, due to non-provision of  
15  
16 any PHH information in daily life, nor in hospital after admitted, they were unaware of when and  
17  
18 how to wash their hands in clinical practice.  
19  
20  
21  
22

23  
24 Patients' performance of HH is poor, and the existing facilities and products are routinely  
25  
26 underutilized, consistent with the findings of previous studies.<sup>15</sup> Although the WHO's  
27  
28 multimodal HH improvement strategies have been implemented by our hospital's Infection  
29  
30 Control Committee with the provision of sinks and wash basins for the performance of  
31  
32 soap-and-water cleaning in every patient's room, and the provision of ABHR for waterless hand  
33  
34 cleaning in the rooms and corridors for all HCWs and patients,<sup>14</sup> the frequency and duration of  
35  
36 handwashing were not satisfactory in this study. A systematical education about PHH seems  
37  
38 necessary, not only for medical staff, but also for patients themselves. It is of great significance  
39  
40 for patients to realize their own behavior for the prevention and control of nosocomial infection  
41  
42 and the promotion of their own safety. Staff should receive education on the importance of PHH  
43  
44 in the prevention of hospital-acquired infection; and staff need to be instructed to provide verbal  
45  
46 PHH education to all newly admitted patients, and to provide reminders, assistance, and  
47  
48  
49  
50  
51  
52  
53  
54  
55  
56  
57  
58  
59  
60

1  
2  
3  
4  
5 encouragement for PHH practice.<sup>16-17</sup> In addition, it is also important to ensure that HH  
6  
7 products—such as alcohol-based hand wipes or ABHR—are accessible to patients who are  
8  
9 bedridden and are unable to get to the sink.<sup>18,19</sup> Staff or family members should be instructed to  
10  
11 provide assistance to improve PHH opportunities.<sup>18</sup>  
12  
13  
14

15  
16 Hands were washed most frequently when they were visibly dirty and after using the toilet,  
17  
18 but less frequently before drinking fluids and taking medicine, which would be the optimal time  
19  
20 for the prevention of fecal-oral transmission. In this study, 75.8% of the participants washed their  
21  
22 hands after using the toilet/bedpan/commode, but only 11.0% of them washed their hands before  
23  
24 drinking fluids. Similar results have been observed in other study on patients in transplant  
25  
26 units.<sup>20</sup> Hospital environments are often contaminated with hospital-acquired pathogens,<sup>16-18</sup>  
27  
28 therefore, there is a need for education campaigns aimed at patient-initiated HH and HH that is  
29  
30 directly observed before meals and the intake of medications during hospitalization.<sup>21,22</sup>  
31  
32  
33  
34  
35

36  
37 Our results also revealed that only 11.9% of the patients washed their hands before  
38  
39 interacting with visitors and 13.2% washed their hands after the visitors left. Visitors may be  
40  
41 vectors of pathogenic organisms that are potentially dangerous, particularly to  
42  
43 immunocompromised patients.<sup>23</sup> If visitors carry certain pathogenic organisms on their hands  
44  
45 and do not perform HH upon entry to the hospital, vulnerable patient populations may be at an  
46  
47 increased risk for infection if they do not wash their hands after the visitors leave.<sup>24</sup> Thus, to win  
48  
49 the battle against HCAs, there is a need for coordinated effort to enforce HH that includes  
50  
51  
52  
53  
54  
55  
56  
57  
58  
59  
60

1  
2  
3  
4  
5 patients, as well as their families, and visitors.<sup>25</sup> In addition to providing better signage and  
6  
7  
8 education among care providers<sup>26,27</sup>, other hospital approaches, such as the installation of more  
9  
10  
11 strict visiting infrastructure (i.e., ICU doors that will not open if ABHR is not used) might be  
12  
13 considered.<sup>23</sup>  
14  
15

16 This study resulted in some significant findings. patients' performance about PHH are  
17  
18 differences in different departments. Patients in 'Medical department' showed significantly  
19  
20 higher PHH performance compared with those in 'Department of Obstetrics/ Gynecology'.  
21  
22 Patients activity and severity of illness may be working, patients in 'medical department' are  
23  
24 mostly treated conservatively, their activity are less restricted than those in 'Department of  
25  
26 Obstetrics/ Gynecology', who may need absolute bed rest because of gynecological surgery or  
27  
28 give birth to a child just now; In addition, Chinese traditional concept may be another factor,  
29  
30 which holds that women should not be exposed to cold water after surgery or after childbirth,  
31  
32 which may also reduce the practice of hand washing.  
33  
34  
35  
36  
37  
38

39 The most significant findings being that ICU patients rarely practice HH compared to those  
40  
41 in other departments. This is not surprising as patients in the ICU are generally critically ill or  
42  
43 unconsciousness, they cannot wash their hands by themselves. Even the assistance of  
44  
45 professional caregivers does not seem to work. This suggests the importance of the role of  
46  
47 caregivers in ensuring adequate HH in such functionally dependent patients. To the best of our  
48  
49 knowledge, this study is the first to provide data on ICU PHH, since most previous studies on  
50  
51  
52  
53  
54  
55  
56  
57  
58  
59  
60

1  
2  
3  
4  
5 ICU HH focused on HCWs or patients' families.<sup>23,28</sup> Considering that multidrug-resistant  
6  
7  
8 acinetobacter baumannii infection are highly in ICU <sup>29</sup> and ICU patients are the most susceptible  
9  
10  
11 populations to nosocomial infections,<sup>30</sup> attention must be given to improving their adherence to  
12  
13 HH rules to reduce hospital infections.

14  
15  
16 Our study also identified occupation such as 'farmer' showed good PHH performance  
17  
18 compared with 'clerk' or 'freelancer'. We did not found the similar findings in other studies, the  
19  
20 reasons for which may be need to be further explored.

21  
22  
23 Our study has several limitations. First, since this is a single-center cross-sectional survey,  
24  
25 our results may not be applicable to all other institutions. Thus, it is recommended that a  
26  
27 multi-center study with a large sample size be conducted in the future. Second, our inclusion of  
28  
29 certain patients and wards may have resulted in selection bias. Physically weak patients were  
30  
31 also recruited in the present study, and their families or caregivers filled out the questionnaire;  
32  
33 therefore, there is a possibility that the family members of caregivers may have provided  
34  
35 information on their own HH situation rather than that of the patients. Therefore, there is a need  
36  
37 for further observational studies including quantitative hand bacterial cultures to verify the  
38  
39 results of this study. Nonetheless, we believe that this study included a representative sample of  
40  
41 inpatients. Third, the study was conducted using a convenience sampling method in the category  
42  
43 of family members. Finally, although the survey findings are interesting, the patients appear to  
44  
45 know that HH is important even though they know little about HH knowledge, the social  
46  
47  
48  
49  
50  
51  
52  
53  
54  
55  
56  
57  
58  
59  
60

1  
2  
3  
4  
5 desirability factor might be operating, the results are not an indicator of how patients may  
6  
7  
8 actually behave in real life.  
9

## 10 **CONCLUSIONS**

11  
12  
13 In conclusion, this study demonstrated that patients had a positive attitude towards HH.  
14  
15 However, their levels of knowledge and practice were unsatisfactory. These results suggest that  
16  
17 A systematical education about PHH is needed in future to correct this knowledge and behavior.  
18  
19  
20 In addition, special attention should be given to those HH moments the compliance rates to  
21  
22  
23 which were the lowest, such as before drinking fluids, as well as before interacting with visitors  
24  
25  
26 and after they leave.  
27  
28  
29  
30

## 31 **Acknowledgments**

32  
33  
34 The authors thank Li Hao RN, Luo Zi-zhao RN, Zhong Xu RN, Luo Yan RN and Hu Chun-Ping  
35  
36 RN for their assistance with data collection, as well as the ward nurse leaders, nursing staff, and  
37  
38 patients of the hospital for their willingness to participate. We also would like to thank Editage  
39  
40  
41 [www.editage.cn] for English language editing.  
42  
43  
44  
45  
46  
47  
48  
49  
50  
51  
52  
53  
54  
55  
56  
57  
58  
59  
60

## Footnotes

**Contributors:** LYX and YSE contributed to the study conception and design, data collection, analysis, interpretation and drafting the manuscript. LYH and ZL contributed to questionnaire design and data collection. LYH and CC contributed to the data collection and data management. MD contributed to the study design, data acquisition and interpretation. All authors contributed to drafting the manuscript and critically revised the manuscript and approved the final version.

**Competing interests:** None declared.

**Funding:** This research did not receive any specific grant from funding agencies in the public, commercial, or not-for-profit sectors.

**Ethics approval:** The study was approved by the Institutional Review Board of Xiangya Hospital, Central South University (No. 201708955).

**Data sharing statement:** Extra data can be extracted by emailing the corresponding author YSE.

## References

1. Seymour CW, Liu VX, Iwashyna TJ, Brunkhorst FM, Rea TD, Scherag A, et al. Assessment of clinical criteria for sepsis: For the Third International Consensus Definitions for Sepsis and Septic Shock (Sepsis-3). *JAMA* 2016;315:762-74. doi: 10.1001/jama.2016.0288
2. Fleischmann C, Scherag A, Adhikari NK, Hartog CS, Tsaganos T, Schlattmann P, et al. Assessment of Global incidence and mortality of hospital-treated sepsis. Current estimates and limitations. *Am J Respir Crit Care Med* 2016;193:259-72. doi: 10.1164/rccm.201504-0781OC.
3. Boyce J M, Didier P. Guideline for hand hygiene in health-care settings: Recommendations of the Healthcare Infection Control Practices Advisory Committee and the HICPAC/ SHEA/ APIC/ IDSA Hand Hygiene Task Force. *Infect Control Hosp Epidemiol* 2002;30:S3-S40.
4. Pittet D, Allegranzi B, Boyce J. The World Health Organization Guidelines on Hand Hygiene in Health Care and Their Consensus Recommendations. *Infect Control Hosp Epidemiol* 2009;30:611-22. doi: 10.1086/600379.2009;30:611-22.
5. Saito H, Borzykowski T, Kilpatrick C, Pires D, Allegranzi B, Pittet D. "It's in your hands - prevent sepsis in health care"; 5 May 2018 World Health Organization (WHO) SAVE LIVES: Clean Your Hands campaign. *Am J Infect Control* 2018;39:1-2. doi: 10.1016/j.ajic.2018.02.006.
6. Meng X, Liu S, Duan J, et al. Risk factors and medical costs for healthcare-associated carbapenem-resistant *Escherichia coli* infection among hospitalized patients in a Chinese teaching hospital. *Bmc Infectious Diseases* 2017; 17(1): 82. doi:10.1186/s12879-016-2176-9.



- 1  
2  
3  
4  
5  
6  
7  
8  
9  
10  
11  
12  
13  
14  
15  
16  
17  
18  
19  
20  
21  
22  
23  
24  
25  
26  
27  
28  
29  
30  
31  
32  
33  
34  
35  
36  
37  
38  
39  
40  
41  
42  
43  
44  
45  
46  
47  
48  
49  
50  
51  
52  
53  
54  
55  
56  
57  
58  
59  
60
7. Li C, Duan J, Liu S, et al. Assessing the risk and disease burden of *Clostridium difficile* infection among patients with hospital-acquired pneumonia at a University Hospital in Central China. *Infection* 2017; 45(5): 621-628. doi: 10.1007/s15010-017-1024-1.
8. Cao W, Zhou R, Ou X, et al. Prevalence of hepatitis B virus, hepatitis C virus, human immunodeficiency virus and *Treponema pallidum* infections in hospitalized patients before transfusion in Xiangya hospital Central South University, China from 2011 to 2016. *BMC Infectious Diseases* 2018; 18: 145. doi: 10.1186/s12879-018-3051-7.
9. Landers T, Abusalem S, Coty MB, Bingham J. Patient-centered hand hygiene: the next step in infection prevention. *Am J Infect Control* 2012;40:S11-S17. doi: 10.1016/j.ajic.2012.02.006.
10. <https://www.cdc.gov/handwashing/when-how-handwashing.html>
11. Alzyood M, Jackson D, Brooke J, Aveyard H. An integrative review exploring the perceptions of patients and healthcare professionals towards patient involvement in promoting hand hygiene compliance in the hospital setting. *J Clin Nurs* 2018;27:1329-45. doi: 10.1111/jocn.14305.
12. National Health Commission of the People's Republic of China. "Standard for hand hygiene for healthcare workers in healthcare settings" [S]. [2009-04-01/ 2009-12-01]. <http://www.nhfpc.gov.cn/zhuz/s9496/200904/40118/files/5fe4afce5b874512a9780c724a4d5be0.pdf>

- 1  
2  
3  
4  
5  
6  
7  
8  
9  
10  
11  
12  
13  
14  
15  
16  
17  
18  
19  
20  
21  
22  
23  
24  
25  
26  
27  
28  
29  
30  
31  
32  
33  
34  
35  
36  
37  
38  
39  
40  
41  
42  
43  
44  
45  
46  
47  
48  
49  
50  
51  
52  
53  
54  
55  
56  
57  
58  
59  
60
13. Cheng VC, Tai JW, Li WS. Implementation of directly observed patient hand hygiene for hospitalized patients by hand hygiene ambassadors in Hong Kong[J]. *Am J Infect Control* 2016; 44(6):621-624. doi: 10.1016/j.ajic.2015.11.024.
14. World Health Organization. A guide to the implementation of the WHO multimodal hand hygiene improvement strategy. Geneva, Switzerland: World Health Organization; 2009.
15. Taylor LJ. An evaluation of hand washing techniques. *Nurs Times* 1978;74:108-10.
16. Ardizzone LL, Smolowitz J, Kline N, Thorn B, Larson EL. Patient hand hygiene practices in surgical patients. *Am J Infect Control* 2013;41:487-91. doi: 10.1016/j.ajic.2012.05.029
17. Pokrywka M, Buraczewski M, Frank D, Dixon H, Ferrelli J, Shutt K, et al. Can improving patient hand hygiene impact *Clostridium difficile* infection events at an academic medical center? *Am J Infect Control* 2017;45:959-63. doi: 10.1016/j.ajic.2017.06.019
18. Huang GKL, Stewardson AJ, Grayson ML. Back to basics: hand hygiene and isolation. *Curr Opin Infect Dis* 2014;27:379-89. doi: 10.1097/QCO.0000000000000080
19. Mac W, Kiernan M, Wilson J, Loveday H, Bradley C. Assessment of the efficacy of a patient hand wipe: development of a test method. *J Hosp Infect* 2017;98:339-44. doi: 10.1016/j.jhin.2017.08.013
20. Srigley JA, Furness CD, Gardam M. Measurement of patient hand hygiene in multi-organ transplant units using a novel technology: an observational study. *Infect Control Hosp Epidemiol* 2014;35:1336-41. doi: 10.1086/678419.

- 1  
2  
3  
4  
5  
6 21. Knighton SC, Dolansky M, Donskey C, Warner C, Rai H, Higgins PA. Use of a verbal  
7  
8 electronic audio reminder with a patient hand hygiene bundle to increase independent patient  
9  
10 hand hygiene practices of older adults in an acute care setting. *Am J Infect Control*  
11  
12 2018;46:610-6. doi: 10.1016/j.ajic.2018.01.005  
13  
14  
15  
16 22. Rai H, Knighton S, Zabarsky TF, Donskey CJ. Comparison of ethanol hand sanitizer versus  
17  
18 moist towelette packets for mealtime patient hand hygiene. *Am J Infect Control* 2017;45:1033-4.  
19  
20 doi: 10.1016/j.ajic.2017.03.018.  
21  
22  
23  
24 23. Birnbach DJ, Rosen LF, Fitzpatrick M, Arheart KL, Munoz-Price LS. An evaluation of hand  
25  
26 hygiene in an intensive care unit: Are visitors a potential vector for pathogens? *J Infect Public*  
27  
28 *Health* 2015;8:570-4. doi: 10.1016/j.jiph.2015.04.027.  
29  
30  
31  
32 24. Okada J, Yamamizu Y, Fukai K. Effectiveness of hand hygiene depends on the patient's  
33  
34 health condition and care environment. *Jpn J Nurs Sci* 2016;13:413-23.  
35  
36 doi: 10.1111/jjns.12122  
37  
38  
39 25. Randle J, Arthur A, Vaughan N. Twenty-four hour observational study of hospital hand  
40  
41 hygiene compliance. *J Hosp Infect* 2010;76:252-5. doi: 10.1016/j.jhin.2010.06.027  
42  
43  
44 26. Lei J H, Guo Y J, Chen Z, et al. Problem/case-based learning with competition introduced in  
45  
46 severe infection education: an exploratory study. *Springerplus* 2016; 5(1):1821. doi:  
47  
48 10.1186/s40064-016-3532-3.  
49  
50  
51  
52  
53  
54  
55  
56  
57  
58  
59  
60

1  
2  
3  
4  
5 27. Xie J, Ming Y, Ding S, et al. Rising Need for Health Education Among Renal Transplant  
6 Patients and Caregiving Competence in Care Providers. *Progress in Transplantation* 2017;  
7  
8 27(2):180. doi: 10.1177/1526924817699962.  
9  
10

11  
12  
13 28. Scheithauer S, Oude-Aost J, Heimann K, Haefner H, Schwanz T, Waitschies B, et al. Hand  
14 hygiene in pediatric and neonatal intensive care unit patients: daily opportunities and indication-  
15 and profession-specific analyses of compliance. *Am J Infect Control* 2011;39:732-7.  
16  
17 doi:10.1016/j.ajic.2010.12.020.  
18  
19

20  
21 29. He L, Meng J, Huang D, et al. Multidrug-resistant *Acinetobacter Baumannii* infection in  
22 Intensive Care Unit: A retrospective analysis. *Zhong nan da xue xue bao. Yi xue ban = Journal*  
23 of Central South University. *Medical sciences* 2015; 40(12):1327-1332. doi:  
24  
25 10.11817/j.issn.1672-7347.2015.12.007.  
26  
27

28  
29 30. Zhou P, Xiong X, Li C, Wu A. Association of Length of Stay With Contamination of  
30 Multidrug-Resistant Organisms in the Environment and Colonization in the Rectum of Intensive  
31 Care Unit Patients in China. *Infect Control Hosp Epidemiol* 2016; 37(1):120-1.  
32  
33 doi: 10.1017/ice.2015.282.  
34  
35  
36  
37  
38  
39  
40  
41  
42  
43  
44  
45  
46  
47  
48  
49  
50  
51  
52  
53  
54  
55  
56  
57  
58  
59  
60

**Table 1** Demographic characteristics of the 310 included patients.

| Characteristic              | Participants (%) |
|-----------------------------|------------------|
| Identity of the respondents |                  |
| Patients                    | 242 (78.1)       |
| Family members/caregivers   | 68 (21.9)        |
| Sex                         |                  |
| Female                      | 145 (46.8)       |
| Male                        | 165 (53.2)       |
| Age, years                  |                  |
| <30                         | 57 (18.4)        |
| 30-39                       | 34 (11.0)        |
| 40-49                       | 56 (18.1)        |
| 50-59                       | 72 (23.2)        |
| ≥60                         | 91 (29.4)        |
| Education level             |                  |
| Primary or below            | 77 (24.8)        |
| Junior high school          | 88 (28.4)        |
| Senior high school          | 62 (20.0)        |
| Technical secondary school  | 20 (6.5)         |
| College                     | 34 (11.0)        |
| Undergraduate               | 28 (9.0)         |
| Postgraduate or above       | 1 (0.3)          |
| Occupation                  |                  |
| Farmer                      | 67 (21.6)        |
| Workman                     | 27 (8.7)         |
| Clerk                       | 47 (15.2)        |
| Medical staff               | 2 (0.6)          |
| Teacher                     | 3 (1.0)          |
| Student                     | 13 (4.2)         |
| Freelancer                  | 34 (11.0)        |
| Unemployed                  | 45 (14.5)        |
| Retiree                     | 72 (23.2)        |
| Place of residence          |                  |
| Urban                       | 147 (47.4)       |
| Town                        | 53 (17.1)        |
| Village                     | 110 (35.5)       |
| Income (RMB/year)†          |                  |
| <50,000                     | 206 (66.5)       |

1  
2  
3  
4  
5  
6  
7  
8  
9  
10  
11  
12  
13  
14  
15  
16  
17  
18  
19  
20  
21  
22  
23  
24  
25  
26  
27  
28  
29  
30  
31  
32  
33  
34  
35  
36  
37  
38  
39  
40  
41  
42  
43  
44  
45  
46  
47  
48  
49  
50  
51  
52  
53  
54  
55  
56  
57  
58  
59  
60

|                                                                                |            |
|--------------------------------------------------------------------------------|------------|
| 50,000~100,000                                                                 | 80 (25.8)  |
| 100,000~200,000                                                                | 18 (5.8)   |
| >200,000                                                                       | 6 (1.9)    |
| Number of hospitalizations                                                     |            |
| 1                                                                              | 117 (37.7) |
| 2                                                                              | 74 (23.9)  |
| ≥3                                                                             | 119 (38.4) |
| The length of hospital stay at the time the questionnaire was completed (days) |            |
| 1-3                                                                            | 67 (21.6)  |
| 4-6                                                                            | 107 (34.5) |
| 7-9                                                                            | 49 (15.8)  |
| 10-13                                                                          | 51 (16.5)  |
| ≥14                                                                            | 36 (11.6)  |
| Ward                                                                           |            |
| Medical ward                                                                   | 110 (35.5) |
| Surgical ward                                                                  | 144 (46.5) |
| Obstetrics/gynecology ward                                                     | 23 (7.4)   |
| Pediatric ward                                                                 | 9 (2.9)    |
| Infectious diseases ward                                                       | 15 (4.8)   |
| Intensive care unit                                                            | 9 (2.9)    |
| Was surgery performed this time?                                               |            |
| Yes                                                                            | 132 (42.6) |
| No                                                                             | 178 (57.4) |
| Is there any infection?                                                        |            |
| Yes                                                                            | 86 (27.7)  |
| No                                                                             | 224 (72.3) |

---

† 50,000 RMB ≈ US\$7,209

**Table 2** Performance of hand hygiene and knowledge and attitudes among the 310 included patients.

| Items                                                    | Total n(%) |
|----------------------------------------------------------|------------|
| <b>Knowledge and attitude</b>                            |            |
| Have you received any education related to hand hygiene? |            |
| Yes                                                      | 147 (47.4) |
| No                                                       | 163 (52.6) |
| Hand hygiene knowledge sources                           |            |
| Television                                               | 76 (28.5)  |
| Newspaper                                                | 20 (7.5)   |
| Magazine                                                 | 18 (6.7)   |
| Internet                                                 | 37 (13.9)  |
| Medical staff                                            | 95 (35.6)  |
| Other                                                    | 21 (7.9)   |
| Do you know anything about hand hygiene?                 |            |
| Don't know                                               | 126 (40.6) |
| A little                                                 | 98 (31.6)  |
| Most                                                     | 44 (14.2)  |
| All                                                      | 42 (13.5)  |
| Is handwashing important for recovery from disease?      |            |
| Yes                                                      | 292 (94.2) |
| No                                                       | 18 (5.8)   |
| Can handwashing prevent infection in patients?           |            |
| Yes                                                      | 289 (93.2) |
| No                                                       | 21 (6.8)   |
| <b>Performance</b>                                       |            |
| How many times do you wash your hands every day?         |            |
| ≤2                                                       | 48 (15.5)  |
| 3~5                                                      | 145 (46.8) |
| 6~10                                                     | 69 (22.3)  |
| >10                                                      | 48 (15.5)  |
| How long does it take to wash your hands every time?     |            |
| <1 min                                                   | 152 (49.0) |
| 1~2 min                                                  | 135 (43.5) |
| ≥ 2 min                                                  | 23 (7.4)   |
| Handwashing ways <sup>†</sup>                            |            |
| Wash basin                                               | 560(18.9)  |
| Flowing water                                            | 1913(64.7) |

1  
2  
3  
4  
5  
6  
7  
8  
9  
10  
11  
12  
13  
14  
15  
16  
17  
18  
19  
20  
21  
22  
23  
24  
25  
26  
27  
28  
29  
30  
31  
32  
33  
34  
35  
36  
37  
38  
39  
40  
41  
42  
43  
44  
45  
46  
47  
48  
49  
50  
51  
52  
53  
54  
55  
56  
57  
58  
59  
60

|                                                |            |
|------------------------------------------------|------------|
| Alcohol-based hand rub                         | 484(16.4)  |
| Handwashing products <sup>†</sup>              |            |
| Tap water only                                 | 1797(46.6) |
| Hand sanitizer                                 | 516(13.4)  |
| Soap                                           | 987(25.6)  |
| Alcohol-based hand rub                         | 555(14.4)  |
| Ways in which you wipe your hands <sup>†</sup> |            |
| Hand towel                                     | 976(20.0)  |
| Any towel                                      | 819(17.5)  |
| Disposable tissues                             | 1012(21.6) |
| Clothes on my body                             | 410(8.8)   |
| Wave hands in the air                          | 873(18.7)  |
| Face towel                                     | 588(12.6)  |
| Do you have a dedicated hand towel?            |            |
| Yes                                            | 130 (41.9) |
| No                                             | 180 (58.1) |
| Times of hand towel washes every day           |            |
| 0                                              | 10(7.7)    |
| 1                                              | 32(24.6)   |
| 2                                              | 29(22.3)   |
| 3                                              | 25(19.2)   |
| 4                                              | 27(20.8)   |
| Wash once every few days                       | 7(5.4)     |

<sup>†</sup> ‘Handwashing ways’, ‘Handwashing products’, and ‘Ways in which you wipe your hands’ these three items are multiple topics, so each number of respondents is over the total number of respondents.



**Table 3** Patient hand hygiene moments.

| <b>Moments</b>                                                                         | <b>Seldom<br/>n(%)</b> | <b>Sometimes<br/>n(%)</b> | <b>Often<br/>n(%)</b> | <b>Always<br/>n(%)</b> | <b>Not<br/>applicable†</b> |
|----------------------------------------------------------------------------------------|------------------------|---------------------------|-----------------------|------------------------|----------------------------|
| 1. After using the toilet, bedpan, or commode                                          | 21(6.8)                | 15(4.8)                   | 39(12.6)              | 235(75.8)              | 0(0.0)                     |
| 2. When returning to the room after a test or procedure                                | 91(29.4)               | 43(13.8)                  | 54(17.4)              | 120(38.7)              | 0(0.0)                     |
| 3. Before eating                                                                       | 41(13.2)               | 37(11.9)                  | 68(21.9)              | 164(52.9)              | 0(0.0)                     |
| 4. Before drinking fluids                                                              | 160(51.6)              | 63(20.3)                  | 53(17.1)              | 34(11.0)               | 0(0.0)                     |
| 5. Before taking medicine                                                              | 130(41.9)              | 49(15.8)                  | 62(20.0)              | 66(21.3)               | 3(0.9)                     |
| 6. When visibly dirty                                                                  | 11(3.5)                | 9(2.9)                    | 23(7.4)               | 267(86.1)              | 0(0.0)                     |
| 7. Before touching any breaks in the skin<br>(e.g., wounds, dressing, tubes)           | 56(18.1)               | 36(11.6)                  | 61(19.7)              | 147(47.4)              | 10(3.1)                    |
| 8. Before any care procedures<br>(e.g., dialysis, IV‡ drug administration, injections) | 145(46.8)              | 54(17.4)                  | 52(16.8)              | 59(19.0)               | 0(0.0)                     |
| 9. Before dialysis, contact with IV lines or other tubes                               | 139(44.8)              | 60(19.4)                  | 44(14.2)              | 61(19.7)               | 6(1.9)                     |
| 10. After coughing, sneezing, or touching nose or mouth                                | 102(32.9)              | 61(19.7)                  | 61(19.7)              | 86(27.7)               | 0(0.0)                     |
| 11. Before interacting with visitors                                                   | 198(63.8)              | 37(11.9)                  | 38(12.3)              | 37(11.9)               | 0(0.0)                     |
| 12. After visitors leave                                                               | 190(61.3)              | 46(14.8)                  | 33(10.6)              | 41(13.2)               | 0(0.0)                     |
| 13. When there is concern about whether hands are clean                                | 78(25.1)               | 57(18.4)                  | 83(26.8)              | 87(28.1)               | 5(1.5%)                    |

† “Not applicable” represents patients who reported that they did not perform the procedure and therefore did not encounter that moment.

‡ “IV” intravenous.

**Table 4** Patients who “always” or “often” practiced hand hygiene in the different departments.

| Moments                                                                             | Medical<br>Wards<br>n/N(%) | Surgical<br>Wards<br>n/N(%) | Obstetrics/<br>gynecology<br>wards<br>n/N(%) | Pediatric<br>wards<br>n/N(%) | Infectious<br>diseases<br>wards<br>n/N(%) | ICU†<br>n/N(%) | Total<br>n/N(%) |
|-------------------------------------------------------------------------------------|----------------------------|-----------------------------|----------------------------------------------|------------------------------|-------------------------------------------|----------------|-----------------|
| 1. After using the toilet, bedpan, or commode                                       | 99/110(90.0)               | 136/144(94.4)               | 19/23(82.6)                                  | 7/9(77.8)                    | 10/15(66.7)                               | 3/9(33.3)      | 274/310(88.4)   |
| 2. When returning to the room after a test or procedure                             | 71/110(64.5)               | 75/144(52.1)                | 12/23(52.2)                                  | 7/9(77.8)                    | 7/15(46.7)                                | 2/9(22.2)      | 174/310(56.1)   |
| 3. Before eating                                                                    | 91/110(82.7)               | 108/144(75.0)               | 15/23(65.2)                                  | 7/9(77.8)                    | 9/15(60.0)                                | 2/9(22.2)      | 232/310(74.8)   |
| 4. Before drinking fluids                                                           | 35/110(31.8)               | 38/144(26.4)                | 4/23(17.4)                                   | 4/9(44.4)                    | 5/15(33.3)                                | 1/9(11.1)      | 87/310(28.1)    |
| 5. Before taking medicine                                                           | 45/110(40.9)               | 59/144(41.0)                | 12/23(52.2)                                  | 6/9(66.7)                    | 4/15(26.7)                                | 2/9(22.2)      | 128/310(41.3)   |
| 6. When visibly dirty                                                               | 106/110(96.4)              | 138/144(95.8)               | 22/23(95.7)                                  | 7/9(77.8)                    | 12/15(80.0)                               | 5/9(55.6)      | 290/310(93.5)   |
| 7. Before touching any breaks in the skin (e.g., wounds, dressing, tubes)           | 79/110(71.8)               | 98/144(68.1)                | 15/23(65.2)                                  | 5/9(55.6)                    | 9/15(60.0)                                | 2/9(22.2)      | 75/310(24.2)    |
| 8. Before any care procedures (e.g., dialysis, IV‡ drug administration, injections) | 41/110(37.3)               | 51/144(35.4)                | 8/23(34.8)                                   | 4/9(44.4)                    | 5/15(33.3)                                | 2/9(22.2)      | 111/310(35.8)   |
| 9. Before dialysis, contact with IV lines or other tubes                            | 37/110(33.6)               | 49/144(34.0)                | 9/23(39.1)                                   | 4/9(44.4)                    | 4/15(26.7)                                | 2/9(22.2)      | 105/310(33.9)   |
| 10. After coughing, sneezing, or touching the nose or mouth                         | 51/110(46.4)               | 73/144(50.7)                | 10/23(43.5)                                  | 4/9(44.4)                    | 7/15(46.7)                                | 2/9(22.2)      | 147/310(47.4)   |
| 11. Before interacting with visitors                                                | 23/110(20.9)               | 34/144(23.6)                | 8/23(34.8)                                   | 3/9(33.3)                    | 6/15(40.0)                                | 1/9(11.1)      | 75/310(24.2)    |
| 12. After visitors leave                                                            | 25/110(22.7)               | 32/144(22.2)                | 5/23(21.7)                                   | 4/9(44.4)                    | 6/15(40.0)                                | 2/9(22.2)      | 74/310(23.9)    |
| 13. When there is concern about whether hands are clean                             | 66/110(60.0)               | 72/144(50.0)                | 13/23(56.5)                                  | 6/9(66.7)                    | 9/15(60.0)                                | 4/9(44.4)      | 170/310(54.8)   |
| Kruskal-Wallis H                                                                    | 574.47                     | 556.01                      | 548.99                                       | 669.5                        | 535.47                                    | 196.56         | 19.838          |
| P-value                                                                             |                            |                             |                                              |                              |                                           |                | 0.001           |

† ICU, intensive care unit; ‡ IV, intravenous.

**Table 5** Identity of participants who “always” performed hand hygiene after using the toilet, bedpan, or commode using the characteristics of the patients and their family members of caregivers.

| Characteristic              | “Always” perform hand hygiene n/N (%) | Unadjusted OR <sup>†</sup> |         | Adjusted OR     |         |
|-----------------------------|---------------------------------------|----------------------------|---------|-----------------|---------|
|                             |                                       | OR (95%CI <sup>‡</sup> )   | P-value | OR (95% CI)     | P-value |
| Identity of the respondents |                                       |                            |         |                 |         |
| Patient                     | 186/242(76.9)                         | 1                          |         |                 |         |
| Family members/caregivers   | 49/68(72.1)                           | 0.78(0.42-1.43)            | 0.42    |                 |         |
| Sex                         |                                       |                            |         |                 |         |
| Male                        | 125/165(75.8)                         | 1                          |         |                 |         |
| Female                      | 110/145(75.9)                         | 0.99(0.59-1.67)            | 0.98    |                 |         |
| Age, years                  |                                       |                            |         |                 |         |
| <30                         | 39/57(68.4)                           | 1                          |         |                 |         |
| 30-39                       | 28/34(82.4)                           | 2.15(0.76-6.12)            | 0.15    |                 |         |
| 40-49                       | 43/56(76.8)                           | 1.53(0.66-3.52)            | 0.32    |                 |         |
| 50-59                       | 54/72(75.0)                           | 1.39(0.64-3.00)            | 0.41    |                 |         |
| ≥60                         | 71/91(78.9)                           | 1.64(0.78-3.46)            | 0.20    |                 |         |
| Education level             |                                       |                            |         |                 |         |
| Primary or below            | 59/77(76.6)                           | 1                          |         |                 |         |
| Junior high school          | 59/88(67.0)                           | 0.62(0.31-1.24)            | 0.18    |                 |         |
| Senior high school          | 51/62(82.3)                           | 1.41(0.61-3.27)            | 0.42    |                 |         |
| Technical secondary school  | 14/20(70.0)                           | 0.71(0.24-2.12)            | 0.54    |                 |         |
| College                     | 28/34(82.4)                           | 1.42(0.51-3.98)            | 0.50    |                 |         |
| Undergraduate               | 23/28(82.1)                           | 1.40(0.47-4.22)            | 0.55    |                 |         |
| Postgraduate or above       | 1/1(100)                              | /                          | 1.00    |                 |         |
| Occupation                  |                                       |                            |         |                 |         |
| Farmer                      | 56/67(83.6)                           | 1                          |         | 1               |         |
| Workman                     | 23/27(85.2)                           | 1.13(0.33-3.92)            | 0.85    | 0.85(0.21-3.39) | 0.82    |
| Clerk                       | 34/47(72.3)                           | 0.51(0.21-1.28)            | 0.15    | 0.18(0.05-0.61) | 0.006   |

1  
2  
3  
4  
5  
6  
7  
8  
9  
10  
11  
12  
13  
14  
15  
16  
17  
18  
19  
20  
21  
22  
23  
24  
25  
26  
27  
28  
29  
30  
31  
32  
33  
34  
35  
36  
37  
38  
39  
40  
41  
42  
43  
44  
45  
46  
47

|                                                                                |               |                  |      |                 |       |
|--------------------------------------------------------------------------------|---------------|------------------|------|-----------------|-------|
| Medical staff                                                                  | 2/2(100)      | /                | 1.00 | /               | 1.00  |
| Teacher                                                                        | 2/3(66.7)     | 0.39(0.03-4.72)  | 0.46 | 0.15(0.01-2.26) | 0.17  |
| Student                                                                        | 8/13(61.5)    | 0.31(0.09-1.14)  | 0.08 | 0.22(0.04-1.24) | 0.09  |
| Freelancers                                                                    | 23/34(67.6)   | 0.41(0.16-1.08)  | 0.07 | 0.18(0.05-0.62) | 0.007 |
| Unemployed                                                                     | 34/45(75.6)   | 0.61(0.24-1.55)  | 0.30 | 0.58(0.21-1.61) | 0.29  |
| Retiree                                                                        | 53/72(73.6)   | 0.55(0.24-1.26)  | 0.16 | 0.36(0.12-1.08) | 0.07  |
| Place of residence                                                             |               |                  |      |                 |       |
| Urban                                                                          | 117/147(79.6) | 1                |      |                 |       |
| Town                                                                           | 37/53(69.8)   | 0.59(0.29-1.21)  | 0.15 |                 |       |
| Village                                                                        | 81/110(73.6)  | 0.72(0.40-1.28)  | 0.26 |                 |       |
| Income (RMB/year)                                                              |               |                  |      |                 |       |
| <50,000                                                                        | 153/206(74.3) | 1                |      |                 |       |
| 50,000~100,000                                                                 | 61/80(76.3)   | 1.11(0.61-2.03)  | 0.73 |                 |       |
| 100,000~200,000                                                                | 16/18(88.9)   | 2.77(0.62-12.46) | 0.18 |                 |       |
| >200,000                                                                       | 5/6(83.3)     | 1.73(0.20-15.16) | 0.62 |                 |       |
| Number of hospitalizations                                                     |               |                  |      |                 |       |
| 1                                                                              | 87/117(74.4)  | 1                |      |                 |       |
| 2                                                                              | 59/74(79.7)   | 1.36(0.67-2.74)  | 0.40 |                 |       |
| ≥3                                                                             | 89/119(74.8)  | 1.02(0.57-1.84)  | 0.94 |                 |       |
| The length of hospital stay at the time the questionnaire was completed (days) |               |                  |      |                 |       |
| 1-3                                                                            | 22/67(32.8)   | 1                |      |                 |       |
| 4-6                                                                            | 32/107(29.9)  | 0.87(0.45-1.68)  | 0.69 |                 |       |
| 7-9                                                                            | 13/49(26.5)   | 0.74(0.33-1.67)  | 0.47 |                 |       |
| 10-13                                                                          | 15/51(29.4)   | 0.85(0.39-1.88)  | 0.69 |                 |       |
| ≥14                                                                            | 9/36(25.0)    | 0.68(0.27-1.70)  | 0.41 |                 |       |
| Ward                                                                           |               |                  |      |                 |       |
| Medical ward                                                                   | 86/110(78.2)  | 1                |      | 1               |       |
| Surgical ward                                                                  | 117/144(81.3) | 1.21(0.65-2.24)  | 0.55 | 1.27(0.58-2.80) | 0.55  |
| Obstetrics/gynecology ward                                                     | 14/23(60.9)   | 0.43(0.17 -1.13) | 0.09 | 0.18(0.04-0.80) | 0.02  |

For peer review only

|    |                                  |               |                 |       |                 |       |
|----|----------------------------------|---------------|-----------------|-------|-----------------|-------|
| 1  |                                  |               |                 |       |                 |       |
| 2  |                                  |               |                 |       |                 |       |
| 3  | Pediatric ward                   | 6/9(66.7)     | 0.56(0.13-3.40) | 0.43  | 0.95(0.12-7.39) | 0.96  |
| 4  | Infectious diseases ward         | 10/15(66.7)   | 0.56(0.17-1.79) | 0.33  | 0.51(0.13-2.04) | 0.34  |
| 5  | ICU <sup>§</sup>                 | 2/9(22.2)     | 0.08(0.02-0.41) | 0.002 | 0.06(0.01-0.45) | 0.006 |
| 6  |                                  |               |                 |       |                 |       |
| 7  | Was surgery performed this time? |               |                 |       |                 |       |
| 8  |                                  |               |                 |       |                 |       |
| 9  | No                               | 135/178(75.8) | 1               |       |                 |       |
| 10 | Yes                              | 100/132(75.8) | 1.01(0.59-1.70) | 0.99  |                 |       |
| 11 |                                  |               |                 |       |                 |       |
| 12 | Is there any infection?          |               |                 |       |                 |       |
| 13 | No                               | 171/224(76.3) | 1               |       |                 |       |
| 14 | Yes                              | 64/86(74.4)   | 1.11(0.63-1.97) | 0.72  |                 |       |
| 15 |                                  |               |                 |       |                 |       |

† OR, odds ratio; ‡ CI, confidence interval; § ICU, intensive care unit.

1  
2  
3  
4  
5 **Figure legends**  
6

7 **Supplemental figure 1. Seven-steps to handwashing**  
8

- 9 1. Rub palms together  
10 2. Rub the back of both hands  
11 3. Interlace fingers and rub hands together  
12 4. Interlock fingers and rub the back of fingers of both hands  
13 5. Rub thumb in a rotating manner followed by the area between index finger and  
14 thumb for both hands  
15 6. Rub fingers on palm for both hands  
16 7. Rub both wrists in a rotating manner  
17  
18  
19  
20  
21  
22  
23  
24  
25  
26  
27  
28  
29  
30  
31  
32  
33  
34  
35  
36  
37  
38  
39  
40  
41  
42  
43  
44  
45  
46  
47  
48  
49  
50  
51  
52  
53  
54  
55  
56  
57  
58  
59  
60



28x28mm (300 x 300 DPI)

## Supplementary File 1

STROBE Statement—Checklist of items that should be included in reports of *cross-sectional studies*

|                              | Item No | Recommendation                                                                                                                                                                                    | Page No |
|------------------------------|---------|---------------------------------------------------------------------------------------------------------------------------------------------------------------------------------------------------|---------|
| <b>Title and abstract</b>    | 1       | (a) Indicate the study's design with a commonly used term in the title or the abstract                                                                                                            | 1       |
|                              |         | (b) Provide in the abstract an informative and balanced summary of what was done and what was found                                                                                               | 1-2     |
| <b>Introduction</b>          |         |                                                                                                                                                                                                   |         |
| Background/rationale         | 2       | Explain the scientific background and rationale for the investigation being reported                                                                                                              | 4       |
| Objectives                   | 3       | State specific objectives, including any prespecified hypotheses                                                                                                                                  | 4-5     |
| <b>Methods</b>               |         |                                                                                                                                                                                                   |         |
| Study design                 | 4       | Present key elements of study design early in the paper                                                                                                                                           | 5       |
| Setting                      | 5       | Describe the setting, locations, and relevant dates, including periods of recruitment, exposure, follow-up, and data collection                                                                   | 5       |
| Participants                 | 6       | (a) Give the eligibility criteria, and the sources and methods of selection of participants                                                                                                       | 5       |
| Variables                    | 7       | Clearly define all outcomes, exposures, predictors, potential confounders, and effect modifiers. Give diagnostic criteria, if applicable                                                          | 6-7     |
| Data sources/<br>measurement | 8*      | For each variable of interest, give sources of data and details of methods of assessment (measurement). Describe comparability of assessment methods if there is more than one group              | 6-8     |
| Bias                         | 9       | Describe any efforts to address potential sources of bias                                                                                                                                         | 6,7,8   |
| Study size                   | 10      | Explain how the study size was arrived at                                                                                                                                                         | 6       |
| Quantitative variables       | 11      | Explain how quantitative variables were handled in the analyses. If applicable, describe which groupings were chosen and why                                                                      | 6-7     |
| Statistical methods          | 12      | (a) Describe all statistical methods, including those used to control for confounding                                                                                                             | 8-9     |
|                              |         | (b) Describe any methods used to examine subgroups and interactions                                                                                                                               | 9       |
|                              |         | (c) Explain how missing data were addressed                                                                                                                                                       | 9       |
|                              |         | (d) If applicable, describe analytical methods taking account of sampling strategy                                                                                                                | 9       |
|                              |         | (e) Describe any sensitivity analyses                                                                                                                                                             | 9       |
| <b>Results</b>               |         |                                                                                                                                                                                                   |         |
| Participants                 | 13*     | (a) Report numbers of individuals at each stage of study—eg numbers potentially eligible, examined for eligibility, confirmed eligible, included in the study, completing follow-up, and analysed | 9       |
|                              |         | (b) Give reasons for non-participation at each stage                                                                                                                                              | 9       |
|                              |         | (c) Consider use of a flow diagram                                                                                                                                                                | 9       |
| Descriptive data             | 14*     | (a) Give characteristics of study participants (eg demographic, clinical, social) and information on exposures and potential confounders                                                          | 9       |
|                              |         | (b) Indicate number of participants with missing data for each variable of interest                                                                                                               | 9       |
| Outcome data                 | 15*     | Report numbers of outcome events or summary measures                                                                                                                                              | 9       |



|    |                          |    |                                                                                     |
|----|--------------------------|----|-------------------------------------------------------------------------------------|
| 1  |                          |    |                                                                                     |
| 2  | Main results             | 16 | (a) Give unadjusted estimates and, if applicable, confounder-adjusted               |
| 3  |                          |    | estimates and their precision (eg, 95% confidence interval). Make clear             |
| 4  |                          |    | which confounders were adjusted for and why they were included                      |
| 5  |                          |    |                                                                                     |
| 6  |                          |    | (b) Report category boundaries when continuous variables were categorized           |
| 7  |                          |    |                                                                                     |
| 8  |                          |    | (c) If relevant, consider translating estimates of relative risk into absolute risk |
| 9  |                          |    | for a meaningful time period                                                        |
| 10 |                          |    |                                                                                     |
| 11 | Other analyses           | 17 | Report other analyses done—eg analyses of subgroups and interactions, and           |
| 12 |                          |    | sensitivity analyses                                                                |
| 13 |                          |    |                                                                                     |
| 14 | <b>Discussion</b>        |    |                                                                                     |
| 15 | Key results              | 18 | Summarise key results with reference to study objectives                            |
| 16 | Limitations              | 19 | Discuss limitations of the study, taking into account sources of potential bias     |
| 17 |                          |    | or imprecision. Discuss both direction and magnitude of any potential bias          |
| 18 |                          |    |                                                                                     |
| 19 | Interpretation           | 20 | Give a cautious overall interpretation of results considering objectives,           |
| 20 |                          |    | limitations, multiplicity of analyses, results from similar studies, and other      |
| 21 |                          |    | relevant evidence                                                                   |
| 22 |                          |    |                                                                                     |
| 23 | Generalisability         | 21 | Discuss the generalisability (external validity) of the study results               |
| 24 |                          |    |                                                                                     |
| 25 | <b>Other information</b> |    |                                                                                     |
| 26 | Funding                  | 22 | Give the source of funding and the role of the funders for the present study        |
| 27 |                          |    | and, if applicable, for the original study on which the present article is based    |
| 28 |                          |    |                                                                                     |
| 29 |                          |    |                                                                                     |
| 30 |                          |    |                                                                                     |
| 31 |                          |    |                                                                                     |
| 32 |                          |    |                                                                                     |
| 33 |                          |    |                                                                                     |
| 34 |                          |    |                                                                                     |
| 35 |                          |    |                                                                                     |
| 36 |                          |    |                                                                                     |
| 37 |                          |    |                                                                                     |
| 38 |                          |    |                                                                                     |
| 39 |                          |    |                                                                                     |
| 40 |                          |    |                                                                                     |
| 41 |                          |    |                                                                                     |
| 42 |                          |    |                                                                                     |
| 43 |                          |    |                                                                                     |
| 44 |                          |    |                                                                                     |
| 45 |                          |    |                                                                                     |
| 46 |                          |    |                                                                                     |
| 47 |                          |    |                                                                                     |
| 48 |                          |    |                                                                                     |
| 49 |                          |    |                                                                                     |
| 50 |                          |    |                                                                                     |
| 51 |                          |    |                                                                                     |
| 52 |                          |    |                                                                                     |
| 53 |                          |    |                                                                                     |
| 54 |                          |    |                                                                                     |
| 55 |                          |    |                                                                                     |
| 56 |                          |    |                                                                                     |
| 57 |                          |    |                                                                                     |
| 58 |                          |    |                                                                                     |
| 59 |                          |    |                                                                                     |
| 60 |                          |    |                                                                                     |
